# Supplementary material
Source: PubMed Central journal article supplement (PMC2535794)

## *Supporting Information*

**Manuscript for:** *J. Am. Chem. Soc (Communication)*  
**Submitted:** July 24, 2006  
**Revised:** Nov 15, 2006

### **Synthesis and Biological Activity of PTEN-Resistant Analogues of Phosphatidylinositol 3,4,5-trisphosphate**

Honglu Zhang<sup>#</sup>, Nicolas Markadieu<sup>&</sup>, Renaud Beauwens<sup>&</sup>, Christophe Erneux<sup>§</sup>,  
and Glenn D. Prestwich<sup>#,\*</sup>

<sup>#</sup>Department of Medicinal Chemistry, The University of Utah, 419 Wakara Way, Suite 205, Salt Lake City, Utah 84108-1257, USA

<sup>&</sup>Department of Cell Physiology, <sup>§</sup>Institut de Recherche Interdisciplinaire (IRIBHM),  
Université Libre de Bruxelles, Campus Erasme, Route de Lennik 808, 1070 Bruxelles,  
Belgium.

Phone: +1-801-585-9051. Fax: +1-801-585-9053. Email: [gprestwich@pharm.utah.edu](mailto:gprestwich@pharm.utah.edu)

- S3 **Supplementary Figure 2. Competitive binding assay of 1b and 2b with Grp1.**
- S4 **Supplementary Figure 3. PTEN Malachite Green Assay to detect the produced free phosphate.**
- S5 **Details of Scheme 1.**
- S6 **Details of Scheme 2.**
- S7-S27 **Experimental details for chemical synthesis.**
- S27 **Experimental protocol for sodium transport ( $I_{Na^+}$ ,  $\mu A/cm^2$ ).**
- S27 **Experimental protocol for binding of analogues 1b and 2b to Grp1.**
- S28 **PTEN Malachite Green Assay Protocol.**
- S29-S93 **Spectroscopic data for typical compounds:**
- S29-S30,  $^1H$  NMR and  $^{13}C$  NMR of compound **4**.
  - S31-S33,  $^1H$  NMR,  $^{31}P$  NMR, and  $^{13}C$  NMR of compound **5**.
  - S34-S36,  $^1H$  NMR,  $^{31}P$  NMR and  $^{13}C$  NMR of compound **6**.
  - S37-S39,  $^1H$  NMR,  $^{31}P$  NMR and  $^{13}C$  NMR of compound **7**.
  - S40-S42,  $^1H$  NMR,  $^{31}P$  NMR and  $^{13}C$  NMR of compound **9a**.
  - S43-S45,  $^1H$  NMR,  $^{31}P$  NMR and  $^{13}C$  NMR of compound **9b**.
  - S46-S48,  $^1H$  NMR,  $^{31}P$  NMR and  $^{13}C$  NMR of compound **9c**.
  - S49-S51,  $^1H$  NMR,  $^{31}P$  NMR and  $^{13}C$  NMR of compound **9d**.
  - S52-S54,  $^1H$  NMR,  $^{31}P$  NMR and  $^{13}C$  NMR of compound **1a**.
  - S55-S57,  $^1H$  NMR,  $^{31}P$  NMR and  $^{13}C$  NMR of compound **1b**.
  - S58-S60,  $^1H$  NMR,  $^{31}P$  NMR and  $^{13}C$  NMR of compound **1c**.
  - S61-S63,  $^1H$  NMR,  $^{31}P$  NMR and  $^{13}C$  NMR of compound **1d**.
  - S64-S66,  $^1H$  NMR,  $^{31}P$  NMR and  $^{13}C$  NMR of compound **10**.
  - S67-S69,  $^1H$  NMR,  $^{31}P$  NMR and  $^{13}C$  NMR of compound **11**.
  - S70-S72,  $^1H$  NMR,  $^{31}P$  NMR and  $^{13}C$  NMR of compound **12a**.
  - S73-S75,  $^1H$  NMR,  $^{31}P$  NMR and  $^{13}C$  NMR of compound **12b**.
  - S76-S78,  $^1H$  NMR,  $^{31}P$  NMR and  $^{13}C$  NMR of compound **12c**.
  - S79-S81,  $^1H$  NMR,  $^{31}P$  NMR and  $^{13}C$  NMR of compound **12d**.
  - S82-S84,  $^1H$  NMR,  $^{31}P$  NMR and  $^{13}C$  NMR of compound **2a**.
  - S85-S87,  $^1H$  NMR,  $^{31}P$  NMR and  $^{13}C$  NMR of compound **2b**.
  - S88-S90,  $^1H$  NMR,  $^{31}P$  NMR and  $^{13}C$  NMR of compound **2c**.
  - S91-S93,  $^1H$  NMR,  $^{31}P$  NMR and  $^{13}C$  NMR of compound **2d**.

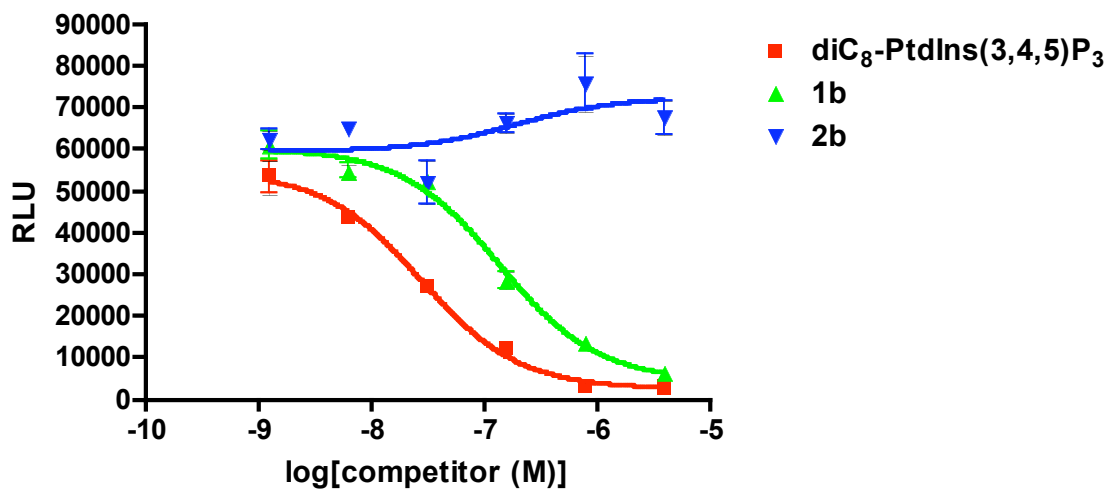

*Supplementary Figure 2.* Competitive displacement of biotinylated-PtdIns(3,4,5)P<sub>3</sub> (10 nM) from Grp1 (10 nM) binding by diC<sub>8</sub>-PtdIns(3,4,5)P<sub>3</sub> and analogues **1b** and **2b**.

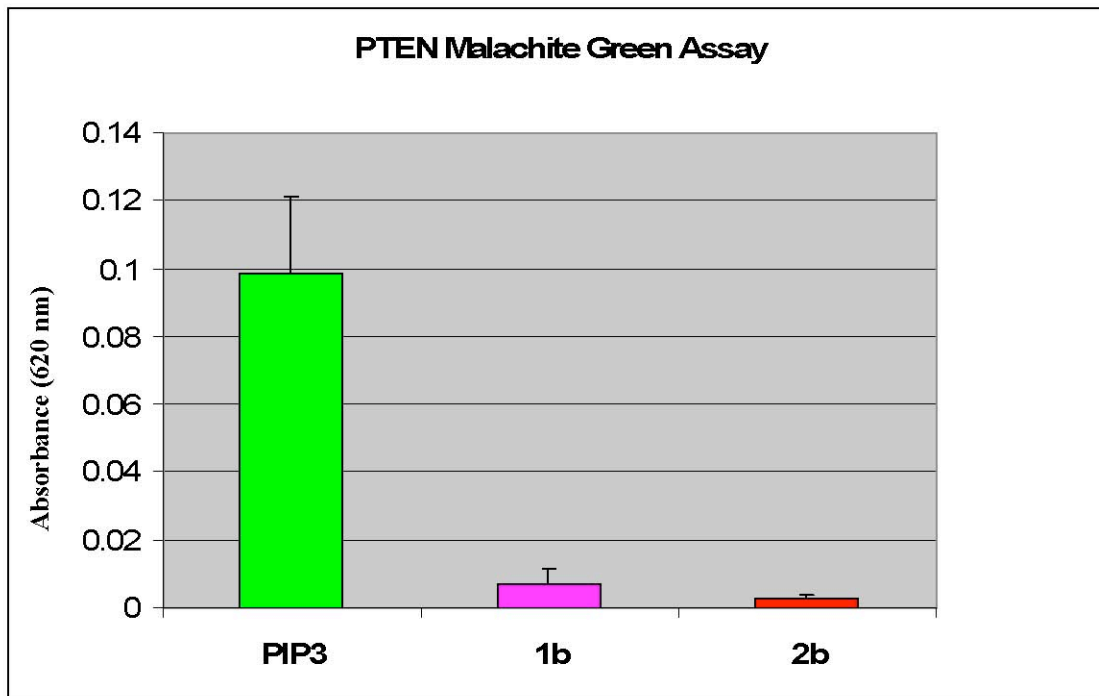

*Supplementary Figure 3.* Detection of free phosphate produced in the PTEN reactions with diC<sub>8</sub>-PI(3,4,5)P<sub>3</sub>, 1b and 2b.

### Scheme 1. Synthesis of Phosphorothioates **1**<sup>a</sup>

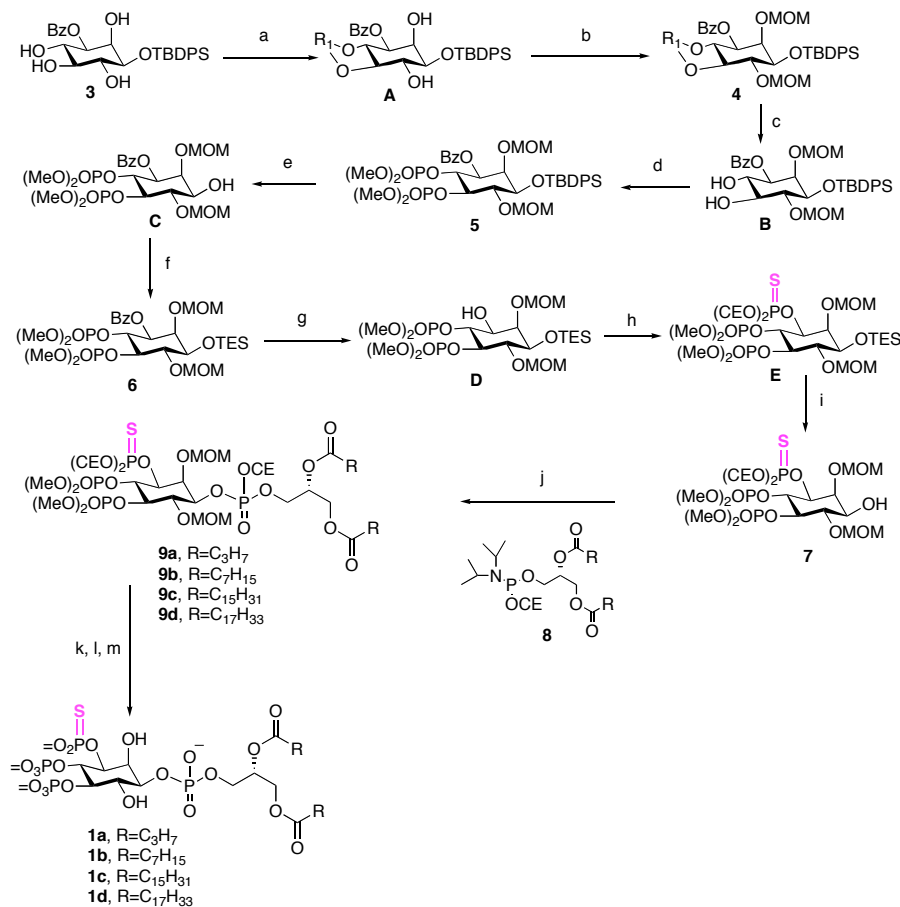

R<sub>1</sub>: TIPDS  
 CE: Cyanoethyl

<sup>a</sup> Conditions: (a) TIPDSCl<sub>2</sub>, imidazole, Py, 12 h, 88%; (b) MOMCl, DIPEA, DMF, 65 °C, 24 h, 63%; (c) TBAF, THF, 1 h, 77%; (d) *N,N*-dimethylphosphoramidite, 1*H*-tetrazole, 12 h; *m*-CPBA, 81%; (e) TBAF•3H<sub>2</sub>O, DMF, 3 h, 91%; (f) TESCl, imidazole, CH<sub>2</sub>Cl<sub>2</sub>, 12 h, 88%; (g) Dibal-H, CH<sub>2</sub>Cl<sub>2</sub>, -78 °C, 1.5 h, 84%; (h) Bis(2-cyanoethoxy)(diisopropylamino)phosphine, 1*H*-tetrazole, 12 h; phenylacetyl disulfide, 30 min, 72%; (i) NH<sub>4</sub>F, MeOH, 85%; (j) 1*H*-tetrazole, CH<sub>2</sub>Cl<sub>2</sub>, rt, 12 h; *t*-BuOOH; (k) TEA, BSTFA, CH<sub>3</sub>CN; (l) TMSBr/CH<sub>2</sub>Cl<sub>2</sub> (2:3), rt, 40 min; (m) MeOH, 1 h.

**Scheme 2. Synthesis of Methylenephosphonates 2<sup>a</sup>**

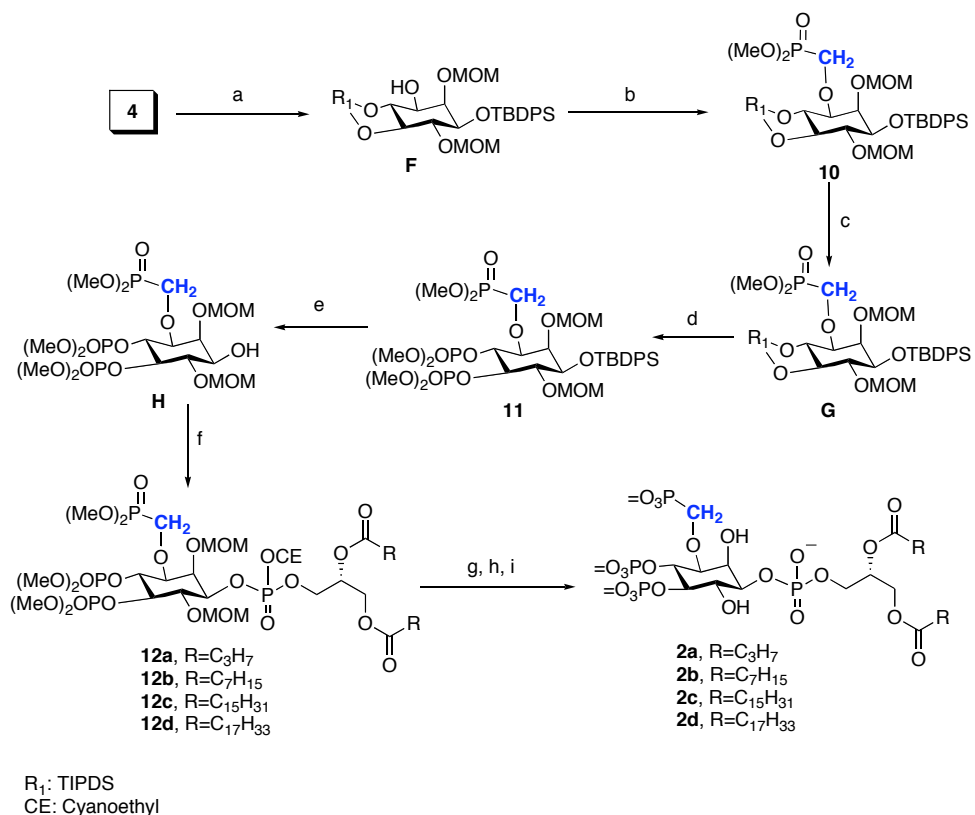

<sup>a</sup> Conditions: (a) Dibal-H, CH<sub>2</sub>Cl<sub>2</sub>, -78 °C, 1.5 h, 88%; (b) *n*-BuLi, HMPA, dimethyl phosphonomethyltriflate, THF, -78 °C to rt, 80%; (c) TBAF, THF, 1 h, 90%; (d) *N,N*-dimethylphosphoramidite, 1*H*-tetrazole, 12 h; *m*-CPBA, 95%; (e) TBAF•3H<sub>2</sub>O, DMF, 3 h, 75%; (f) **8**, 1*H*-tetrazole, CH<sub>2</sub>Cl<sub>2</sub>, rt, 12 h; *t*-BuOOH; (g) TEA, BSTFA, CH<sub>3</sub>CN; (h) TMSBr/CH<sub>2</sub>Cl<sub>2</sub> (2:3), rt, 40 min; (i) MeOH, 1 h.

## Experimental details for chemical synthesis.

**General.** Chemicals were purchased from Aldrich and Acros Chemical Corporation and used without prior purification. Solvents were reagent-grade and distilled before use: CH<sub>2</sub>Cl<sub>2</sub> was distilled from CaH<sub>2</sub> and THF was distilled from sodium wire. TLC used precoated silica gel glass sheets (EM SCIENCE silica gel 60F<sub>254</sub>). Flash chromatography (FC) employed Whatman 230~400 mesh ASTM silica gel. NMR spectra were recorded on a Varian INOVA 400 at 400 MHz (<sup>1</sup>H), 101 MHz (<sup>13</sup>C), 162 MHz (<sup>31</sup>P) and 376 MHz (<sup>19</sup>F) at 25 °C. Chemical shifts are reported in ppm with TMS as internal standard ( $\delta = 0.00$ ); <sup>31</sup>P, 85% H<sub>3</sub>PO<sub>4</sub> ( $\delta = 0.00$ ); <sup>19</sup>F, CFCl<sub>3</sub> ( $\delta = 0.00$ ). Low- and high-resolution mass spectra were obtained on HP5971A MSD and Finnigan MAT95 double focusing mass spectrometer (MS) instruments, respectively.

**1D-1-*O*-(*tert*-Butyldiphenylsilyl)-3-*O*-benzoyl-3,4-*O*-(1,1,3,3-tetraisopropylidisiloxanedi-1,3-yl)-*myo*-inositol (A).** A solution of tetrol **3** (900 mg, 1.72 mmol) and imidazole (250 mg, 3.44 mmol) in pyridine (10 mL) was treated with TIPDS-Cl<sub>2</sub> (597.8 mg, 1.9 mmol) at - 5 °C and then slowly warmed to rt. The progress of the reaction was monitored by TLC. After 12 h the mixture was concentrated and subjected to the aqueous workup. The organic phase was concentrated, and the residue was chromatographed on silica gel (hexanes/EtOAc, 10 :1) giving pure product **A** (720 mg, 88%) as a colorless glassy solid.  $[\alpha]_D^{20} = + 13.4$  (*c* 0.85, CHCl<sub>3</sub>); <sup>1</sup>H NMR (400 MHz, CDCl<sub>3</sub>)  $\delta$  8.09 (d, *J* = 8.0 Hz, 2H), 7.79-7.74 (m, 4H), 7.56-7.38 (m, 9H), 4.99 (dd, *J* = 10.4, 2.0 Hz, 1H), 4.30 (t, *J* = 9.2 Hz, 1H), 4.04 (t, *J* = 9.2 Hz, 1H), 3.98 (t, *J* = 2.8 Hz, 1H), 3.80 (dd, *J* = 9.2, 2.8 Hz, 1H), 3.48 (t, *J* = 9.2 Hz, 1H), 2.67 (s, 1H), 2.33 (s, 1H), 1.13 (s, 9H), 1.08-0.81 (m,

28H);  $^{13}\text{C}$  NMR (101 MHz,  $\text{CDCl}_3$ )  $\delta$  165.8, 136.2, 136.2, 133.4, 133.2, 133.2, 130.3, 130.1, 130.1, 128.5, 128.1, 127.9, 78.4, 74.0, 73.9, 73.3, 73.2, 71.5, 27.3, 19.7, 17.7, 17.6, 17.6, 17.5, 17.3, 17.2, 13.1, 13.0, 12.3, 12.3; MALDI-HRMS  $[\text{M} + \text{Na}]^+$  calcd for  $\text{C}_{41}\text{H}_{60}\text{O}_8\text{Si}_3\text{Na}$  787.3488, found 787.3488.

**1D-1-*O*-(*tert*-Butyldiphenylsilyl)-3-*O*-benzoyl-2,6-*O*-bis(methoxymethylene)-4,5-*O*-(1,1,3,3-tetraisopropylidisiloxanedi-1,3-yl)-*myo*-inositol (4).** To a solution of the diol **A** (700 mg, 0.92 mmol) and DIPEA (1.4 mL, 8.27 mmol) in DMF (8 mL), was added MOMCl (0.5 mL, 6.59 mmol). After 24 h at 65 °C, the solvents were removed and the residue after aqueous work-up was loaded on a silica gel column. Purification (hexanes/EtOAc, 20:1) afforded **4** (1.8 g, 63%) as a colorless glass.  $[\alpha]_{\text{D}}^{20} = +40.1$  (*c* 1.1,  $\text{CHCl}_3$ );  $^1\text{H}$  NMR (400 MHz,  $\text{CDCl}_3$ )  $\delta$  8.00 (d,  $J = 7.2$  Hz, 2H), 7.84 (d,  $J = 6.8$  Hz, 2H), 7.76 (m, 2H), 7.54-7.37 (m, 9H), 5.03 (d,  $J = 6.0$  Hz, 1H), 4.85 (d,  $J = 6.4$  Hz, 1H), 4.79 (dd,  $J = 10.0, 2.0$  Hz, 1H), 4.56 (d,  $J = 2.8$  Hz, 2H), 4.19 (t,  $J = 8.8$  Hz, 1H), 4.08 (t,  $J = 9.6$  Hz, 1H), 4.06 (s, 1H), 3.64 (t,  $J = 8.4$  Hz, 1H), 3.47 (s, 3H), 3.21 (s, 3H), 1.16 (s, 9H), 1.11-0.82 (m, 28H);  $^{13}\text{C}$  NMR (101 MHz,  $\text{CDCl}_3$ )  $\delta$  165.5, 136.5, 136.2, 134.1, 133.2, 133.0, 130.3, 130.3, 130.1, 129.9, 128.4, 128.2, 127.9, 98.8, 98.1, 78.5, 77.0, 74.6, 73.9, 73.2, 56.8, 55.9, 27.5, 19.5, 17.7, 17.6, 17.5, 17.5, 17.4, 17.3, 17.2, 13.1, 13.1, 12.2, 12.2; MALDI-HRMS  $[\text{M} + \text{Na}]^+$  calcd for  $\text{C}_{45}\text{H}_{68}\text{O}_{10}\text{Si}_3\text{Na}$  875.4013, found 875.4037.

**1D-1-*O*-(*tert*-Butyldiphenylsilyl)-3-*O*-benzoyl-2,6-*O*-bis(methoxymethylene)-*myo*-inositol (B).** At 0 °C TBAF (1 M in THF, 2 mL, 2 mmol) was added to inositol **4** (780 mg, 0.92 mmol) in 2 mL THF, then warmed to rt. The reaction mixture was stirred at rt



for 1 h, TLC showed the end of the reaction. The reaction system was diluted with EtOAc, and washed with water, 1 N HCl, then saturated aqueous NaCl solution. The organic solvents were dried with Na<sub>2</sub>SO<sub>4</sub>, then concentrated and flash chromatographed (hexanes/EtOAc, 1:1) to afford diol **B** (430 mg, 77%).  $[\alpha]_D^{20} = +18.7$  (*c* 0.97, CHCl<sub>3</sub>); <sup>1</sup>H NMR (400 MHz, CDCl<sub>3</sub>) δ 8.07 (dd, *J* = 8.0, 1.6 Hz, 2H), 7.72 (dd, *J* = 7.6, 1.6 Hz, 2H), 7.67 (dd, *J* = 7.6, 1.6 Hz, 2H), 7.55- 7.35 (m, 9H), 4.84 (d, *J* = 6.8 Hz, 1H), 4.79 (dd, *J* = 10.4, 2.4 Hz, 1H), 4.71 (d, *J* = 6.4 Hz, 1H), 4.34 (d, *J* = 7.2 Hz, 1H), 4.19-3.98 (m, 3H), 3.91 (d, *J* = 7.2 Hz, 1H), 3.86 (dd, *J* = 9.2, 2.4 Hz, 1H), 3.71 (t, *J* = 9.2 Hz, 1H), 3.34 (s, 1H), 3.21 (s, 3H), 3.18 (s, 3H), 2.99 (s, 1H), 1.04 (s, 9H); <sup>13</sup>C NMR (101 MHz, CDCl<sub>3</sub>) δ; 166.4, 136.2, 135.8, 134.6, 133.3, 133.2, 130.2, 130.1, 129.7, 128.5, 128.2, 128.0, 127.7, 98.3, 98.2, 85.6, 74.6, 73.5, 73.1, 71.1, 56.1, 55.7, 27.3, 19.6. MALDI-HRMS [*M* + Na]<sup>+</sup> calcd for C<sub>33</sub>H<sub>42</sub>O<sub>9</sub>SiNa 633.2490, found 633.2498.

**1D-1-*O*-(*tert*-Butyldiphenylsilyl)-3-*O*-benzoyl-2,6-*O*-bis(methoxymethylene)-4,5-bis(dimethylphosphate)-*myo*-inositol (**5**).** A solution of diol **B** (103 mg, 0.17 mmol) and 1-*H* tetrazole (40 mg, 0.55 mmol) in CH<sub>2</sub>Cl<sub>2</sub> (2 mL) was treated with dimethyl *N,N*-diisopropylphosphoramidite (0.16 mL, 0.68 mmol) under Ar. After 12 h the result mixture was cooled to – 20 °C and treated with *m*-CPBA (230 mg, 1mmol). After warm-up to rt, saturated aqueous Na<sub>2</sub>S<sub>2</sub>O<sub>3</sub> and NaHCO<sub>3</sub> were added and stirred for 30 min. The reaction mixture was extracted with CH<sub>2</sub>Cl<sub>2</sub> and dried with Na<sub>2</sub>SO<sub>4</sub>. The organic phase was concentrated, and the residue was chromatographed on silica gel (hexanes/acetone, 1:1) giving pure product **5** (113 mg, 81%) as an oil.  $[\alpha]_D^{20} = +39.3$  (*c* 0.70, CHCl<sub>3</sub>); <sup>1</sup>H NMR (400 MHz, CDCl<sub>3</sub>) δ 8.07 (dd, *J* = 8.0, 1.2 Hz, 2H), 7.72 (dd, *J* = 8.0, 1.6 Hz, 2H),

7.60 (dd,  $J = 8.0, 2.4$  Hz, 2H), 4.99 (d,  $J = 6.0$  Hz, 1H), 4.97 (t,  $J = 8.4$  Hz, 1H), 4.74 (d,  $J = 5.6$  Hz, 1H), 4.72 (dd,  $J = 10.4, 2.8$  Hz, 1H), 4.43-4.34 (m, 3H), 4.17 (t,  $J = 9.6$  Hz, 1H), 3.98 (dd,  $J = 9.6, 1.8$  Hz, 1H), 3.81 (d,  $J = 5.6$  Hz, 3H), 3.78 (d,  $J = 5.2$  Hz, 3H), 3.68 (d,  $J = 11.6$  Hz, 3H), 3.46 (s, 3H), 3.44 (t,  $J = 2.2$  Hz, 1H), 3.15 (d,  $J = 11.2$  Hz, 3H), 3.08 (s, 3H), 1.09 (s, 9H);  $^{13}\text{C}$  NMR (101 MHz,  $\text{CDCl}_3$ )  $\delta$  165.2, 136.2, 136.0, 133.5, 133.3, 132.5, 130.4, 130.3, 130.2, 129.6, 128.4, 128.3, 128.1, 99.0, 98.0, 78.9, 76.5, 76.2, 73.6, 71.5, 57.1, 56.1, 54.8, 54.8, 54.7, 53.8, 53.7, 27.4, 19.4;  $^{31}\text{P}$  NMR (162 MHz,  $\text{CDCl}_3$ )  $\delta$  1.71 (s, 1P), 0.86 (s, 1P). MALDI-HRMS  $[\text{M} + \text{Na}]^+$  calcd for  $\text{C}_{37}\text{H}_{52}\text{O}_{15}\text{P}_2\text{SiNa}$  849.2443, found 849.2445.

**1D-3-O-Benzoyl-2,6-O-bis(methoxymethylene)-4,5-bis(dimethylphosphate)-myo-**

**inositol (C):** Diphosphate **5** (180 mg, 0.22 mmol) was dissolved in 2.4 mL DMF, to the mixture was added TBAF•3H<sub>2</sub>O (110 mg, 0.35 mmol), stirred at room temperature for 3 h. The mixture was concentrated, diluted with EtOAc, and then washed with water, 1 N HCl, saturated aqueous NaCl solution. The organic phase dried with Na<sub>2</sub>SO<sub>4</sub>. The crude product was chromatographed on silica gel (hexanes/acetone, 1:2) to give bisphosphate **C** (118 mg, 91%) as colorless oil.  $[\alpha]_{20}^{\text{D}} = + 6.0$  ( $c$  0.65,  $\text{CHCl}_3$ );  $^1\text{H}$  NMR(400 MHz,  $\text{CDCl}_3$ )  $\delta$  8.15 – 8.13 (m, 2H), 7.52 (t,  $J = 7.6$  Hz, 1H), 7.41 (t,  $J = 7.6$  Hz, 2H), 5.08 – 5.04 (m, 2H), 4.78 (d,  $J = 6.8$  Hz, 2H), 4.70 (d,  $J = 6.8$  Hz, 1H), 4.58 (d,  $J = 6.8$  Hz, 1H), 4.48-4.42 (m, 1H), 4.26 (t,  $J = 3.0$  Hz, 2H), 3.80 (s, 6H), 3.77 (s, 6H), 3.74 (s, 1H), 3.71 (s, 1H), 3.68 (s, 1H), 3.65-3.61 (m, 2H), 3.44 (s, 3H), 3.24 (s, 1H), 3.22 (s, 1H), 3.20 (s, 3H), 3.17 (d,  $J = 2.8$  Hz, 1H);  $^{13}\text{C}$  NMR (101 MHz,  $\text{CDCl}_3$ )  $\delta$  165.8, 133.6, 130.4, 130.1, 129.4, 128.6, 128.5, 99.1, 99.2, 83.3, 79.1, 79.1, 76.8, 75.5, 71.9, 70.4, 56.5, 56.2, 54.9,

54.7, 54.5, 53.9; <sup>31</sup>P NMR (162 MHz, CDCl<sub>3</sub>) δ 1.51 (1P), 1.21 (1P); MALDI-HRMS [M + Na]<sup>+</sup> calcd for C<sub>21</sub>H<sub>34</sub>O<sub>15</sub>P<sub>2</sub>Na 611.1271, found 611.1306.

**1D-1-O-triethylsilyl-3-O-Benzoyl-2,6-O-bis(methoxymethylene)-4,5-**

**bis(dimethylphosphate)-myo-inositol (6).** A solution of alcohol obtained above **C** (60 mg, 0.10 mmol) and imidazole (68 mg, 1.0 mmol) in CH<sub>2</sub>Cl<sub>2</sub> (5 mL) was treated with TEPC1 (0.10 mL, 0.6 mmol) at rt. After 12 h the mixture was concentrated and subjected to the aqueous workup. The organic phase was concentrated, and the residue was chromatographed on silica gel (hexanes/acetone, 2:3) giving pure product **6** (63 mg, 88%) as a colorless oil. [α]<sub>20</sub><sup>D</sup> = + 27.9 (c 0.68, CHCl<sub>3</sub>); <sup>1</sup>H NMR(400 MHz, CDCl<sub>3</sub>) δ 8.15 – 8.12 (m, 2H), 7.50 (t, *J* = 7.2 Hz, 1H), 7.40 (t, *J* = 7.6 Hz, 2H), 5.05 – 4.94 (m, 2H), 4.85 (d, *J* = 6.4 Hz, 2H), 4.73 (dd, *J* = 10.4, 6.8 Hz, 2H), 4.54 (d, *J* = 6.8 Hz, 1H), 4.39 (q, *J* = 9.2 Hz, 1H), 4.06 (s, 1H), 3.99 (t, *J* = 9.6 Hz, 1H), 3.77 (d, *J* = 1.2 Hz, 3H), 3.75 (d, *J* = 1.6 Hz, 3H), 3.67 (d, *J* = 11.6 Hz, 4H), 3.41 (s, 3H), 3.17 (d, *J* = 11.6 Hz, 3 H), 3.14 (s, 3H), 0.91 (t, *J* = 7.6 Hz, 9 H), 0.60 (q, *J* = 7.6 Hz, 6H); <sup>13</sup>C NMR (101 MHz, CDCl<sub>3</sub>) δ 165.8, 133.5, 130.4, 129.5, 128.5, 98.6, 97.5, 79.0, 76.1, 75.9, 73.0, 72.0, 57.0, 56.1, 54.1, 54.8, 54.8, 54.7, 54.6, 54.6, 53.8, 53.7, 7.0, 5.0; <sup>31</sup>P NMR (162 MHz, CDCl<sub>3</sub>) δ 1.79 (1P), 1.02 (1P); MALDI-HRMS [M + Na]<sup>+</sup> calcd for C<sub>27</sub>H<sub>48</sub>O<sub>15</sub>P<sub>2</sub>Na 725.2135, found 725.2148.

**1D-1-O-triethylsilyl-2,6-O-bis(methoxymethylene)-4,5-bis(dimethylphosphate)-myo-**

**inositol (D).** A solution of diisobutylaluminium hydride (0.5 mL, 1 M in Hexanes, 0.5 mmol) was added dropwise at – 78 °C to a solution of **6** (63 mg, 0.09 mmol) in dry

CH<sub>2</sub>Cl<sub>2</sub> (3 mL). After stirring for 1.5 h at – 78 °C, methanol (5 mL) was added slowly to quench the reaction and allowed to warm to rt. The reaction mixture was poured to wet Na<sub>2</sub>SO<sub>4</sub> and stirred for a while. The solid Na<sub>2</sub>SO<sub>4</sub> was filtered off and washed with EtOAc. The filtrate was concentrated and the residue was chromatographed on silica gel (hexanes/acetone, 1:2) giving pure product **D** (45 mg, 84%) as a colorless oil.  $[\alpha]_{20}^D = +9.7$  (*c* 0.50, CHCl<sub>3</sub>); <sup>1</sup>H NMR(400 MHz, CDCl<sub>3</sub>) δ 4.82 (d, *J* = 6.0 Hz, 1H), 4.75 (d, *J* = 6.8 Hz, 2H), 4.70 (t, *J* = 6.8 Hz, 2H), 4.46 (q, *J* = 6.8 Hz, 2H), 4.26 (q, *J* = 9.2 Hz, 1H), 3.89 (t, *J* = 9.6 Hz, 1H), 3.82 (t, *J* = 2.0 Hz, 1H), 3.79 (d, *J* = 3.6 Hz, 3H), 3.77 (d, *J* = 3.6 Hz, 3H), 3.75 (d, *J* = 6.8 Hz, 3H), 3.72 (d, *J* = 6.4 Hz, 3H), 3.55 (m, 2H), 3.40 (s, 3H), 3.39 (s, 3H), 0.91 (t, *J* = 8.0 Hz, 9 H), 0.60 (q, *J* = 8.0 Hz, 6H); <sup>13</sup>C NMR (101 MHz, CDCl<sub>3</sub>) δ 98.5, 98.3, 80.6, 80.5, 80.2, 78.7, 76.4, 72.9, 70.8, 56.9, 56.3, 55.2, 55.1, 55.1, 54.7, 54.6, 54.6, 7.0, 5.0; <sup>31</sup>P NMR (162 MHz, CDCl<sub>3</sub>) δ 3.05 (1P), 2.04 (1P); CI-HRMS  $[M + H]^+$  calcd for C<sub>20</sub>H<sub>45</sub>O<sub>14</sub>P<sub>2</sub>Si 599.2053, found 599.2040.

**1D-1-*O*-triethylsilyl-3-(bis(cyanoethyl)phosphothionate)-2,6-*O*-bis (methoxymethylene)-4,5-bis(dimethylphosphate)-*myo*-inositol (E).** Bis(2-cyanoethoxy)

(diisopropylamino)phosphine (38.5 mg, 0.16 mmol) was added to a solution of inositol **D** (40 mg, 0.067 mmol) and 1*H*-tetrazole (11 mg, 0.16 mmol) in 0.5 mL mixture solvents of CH<sub>2</sub>Cl<sub>2</sub>/CH<sub>3</sub>CN (1:1). The mixture was stirred at rt under Ar for overnight. Then the phenylacetyl disulfide (140 mg, 0.4 mmol) was added and stirred for 30 min. The result mixture was diluted with 50 mL EtOAc and washed with water. After dried with Na<sub>2</sub>SO<sub>4</sub>, The organic phase was concentrated, and the residue was chromatographed on silica gel (hexanes/acetone, 1:2) to afford pure product **E** (41 mg, 72%) as a colorless oil.  $[\alpha]_{20}^D =$

+ 5.8 (*c* 0.40, CHCl<sub>3</sub>); <sup>1</sup>H NMR(400 MHz, CDCl<sub>3</sub>) δ 4.81 (d, *J* = 6.4 Hz, 1H), 4.76 (d, *J* = 6.8 Hz, 1H), 4.74-4.66 (m, 3H), 4.36-4.22 (m, 6H), 4.13 (s, 1H), 3.91 (t, *J* = 9.6 Hz, 1H), 3.78-3.75 (m, 12H), 3.54 (dd, *J* = 9.6, 1.6 Hz, 1H), 3.39 (s, 3H), 3.35 (s, 3H), 0.91 (t, *J* = 8.0 Hz, 9 H), 0.61 (q, *J* = 8.0 Hz, 6H); <sup>13</sup>C NMR (101 MHz, CDCl<sub>3</sub>) δ 116.9, 116.7, 98.6, 97.7, 78.2, 76.7, 76.6, 75.9, 72.6, 63.3, 63.2, 63.1, 63.0, 57.0, 56.3, 55.3, 55.2, 55.1, 55.0, 55.0, 55.0, 54.9, 54.9, 19.6, 19.6, 7.0, 4.9; <sup>31</sup>P NMR (162 MHz, CDCl<sub>3</sub>) δ 67.63 (1P), 1.77 (1P), 1.74 (1P); CI-HRMS [M + H]<sup>+</sup> calcd for C<sub>26</sub>H<sub>52</sub>N<sub>2</sub>O<sub>16</sub>P<sub>3</sub>SSi 801.2019, found 801.1970.

**1D-3-(bis(cyanoethyl)phosphothionate)-2,6-O-bis(methoxymethylene)-4,5-**

**bis(dimethylphosphate)-myo-inositol (7).** To a solution of **E** (10 mg, 0.012 mmol) in methanol (0.5 mL) was added NH<sub>4</sub>F (4.5 mg, 0.12 mmol). The resulting mixture was stirred at rt for 3 h, concentrated and chromatographed on silica gel (hexanes/acetone, 1:3) to afford pure product **7** (7.5 mg, 85%) as a colorless oil. [α]<sub>20</sub><sup>D</sup> = - 16.7 (*c* 0.75, CHCl<sub>3</sub>); <sup>1</sup>H NMR(400 MHz, CDCl<sub>3</sub>) δ 4.81 (d, *J* = 6.4 Hz, 1H), 4.78 (d, *J* = 6.8 Hz, 1H), 4.72 (q, *J* = 7.2 Hz, 2H), 4.64 (d, *J* = 7.2 Hz, 1H), 4.40-4.26 (m, 1H), 3.91 (t, *J* = 9.6 Hz, 1H), 3.78-3.75 (m, 12H), 3.54 (dd, *J* = 9.6, 1.6 Hz, 1H), 3.39 (s, 8H), 3.78-3.67 (m, 12H), 3.48 (dd, *J* = 9.2, 2.0 Hz, 1H), 3.40 (s, 3H), 3.39 (s, 3H), 2.75 (q, *J* = 6.0 Hz, 4H); <sup>13</sup>C NMR (101 MHz, CDCl<sub>3</sub>) δ 117.0, 116.8, 99.1, 98.3, 83.2, 78.6, 76.5, 76.3, 70.1, 63.3, 63.23, 63.1, 63.0, 56.5, 56.3, 55.3, 55.2, 55.0, 54.94, 54.9, 54.6, 54.6, 29.3, 19.7, 19.6; <sup>31</sup>P NMR (162 MHz, CDCl<sub>3</sub>) δ 67.59 (1P), 1.79 (1P), 1.54 (1P); MALDI-HRMS [M + Na]<sup>+</sup> calcd for C<sub>20</sub>H<sub>37</sub>N<sub>2</sub>NaO<sub>16</sub>P<sub>3</sub>S 709.0974, found 709.1033.

**1D-O-(1,2-Di-O-butanoyl-*sn*-(2S)-glycerol-3-O-cyanoethylphospho)-3-(bis(cyano ethyl)phosphothionate)-2,6-O-bis(methoxymethylene)-4,5-bis(dimethylphosphate)-*myo*-inositol (9a).** To a solution of alcohol **7** (20 mg, 0.029 mmol) in dry CH<sub>2</sub>Cl<sub>2</sub> (0.5 mL) was added *N,N*-diisopropyl-*O*-cyanoethyl-*O*-(di-butanoyl-*sn*-(2S)-glycerol)phosphonamidite **8a** (20 mg, 0.047 mmol) and 1*H*-tetrazole (6 mg, 0.085 mmol). The mixture was stirred at rt for 12 h. Oxidation was then performed with *t*-BuOOH (25 μL, 5.5 M in decane, 0.14 mmol) at rt for 1 h. The solution was diluted with CH<sub>2</sub>Cl<sub>2</sub> (20 mL) and washed with saturated aqueous Na<sub>2</sub>S<sub>2</sub>O<sub>4</sub>. The organic layer was concentrated and the residue purified by chromatograph (acetone/hexanes, 2:1) to give **9a** (28 mg, 93%) as a yellow oil.  $[\alpha]_{20}^D = -13.8$  (*c* 1.07, CHCl<sub>3</sub>); <sup>1</sup>H NMR(400 MHz, CDCl<sub>3</sub>) δ 5.22 (m, 1H), 4.77-4.69 (m, 5H), 4.50 (d, *J* = 10.0 Hz, 1H), 4.41-4.06 (m, 13H), 4.00 (td, *J* = 9.6, 2.4 Hz, 1H), 3.79-3.74 (m, 12H), 3.38 (s, 3H), 3.37 (s, 3H), 2.80-2.72 (m, 6H), 2.29-2.23 (m, 4H), 1.62-1.55 (m, 4H), 0.91-0.86 (m, 6H); <sup>13</sup>C NMR (101 MHz, CDCl<sub>3</sub>) δ 173.3, 173.0, 172.9, 117.1, 117.0, 116.8, 99.0, 98.3, 98.3, 77.9, 75.8, 75.2, 75.0, 69.5, 69.5, 66.5, 66.4, 63.3, 63.2, 62.7, 62.7, 62.7, 62.6, 61.7, 56.9, 56.5, 56.4, 55.3, 55.2, 55.1, 55.0, 54.99, 54.9, 54.8, 36.5, 36.2, 19.0, 19.7, 19.6, 19.5, 18.5, 13.8, 13.7; <sup>31</sup>P NMR (162 MHz, CDCl<sub>3</sub>) δ 67.45 and 67.28 (1P), 1.94 and 1.92 (1P), 1.86 and 1.83 (1P), -1.02 and -1.34 (1P); MALDI-HRMS [M + H]<sup>+</sup> calcd for C<sub>34</sub>H<sub>60</sub>N<sub>3</sub>O<sub>23</sub>P<sub>4</sub>S 1034.2288, found 1034.2270.

**1D-O-(1,2-Di-O-octanoyl-*sn*-(2S)-glycerol-3-O-cyanoethylphospho)-3-(bis(cyano ethyl)phosphothionate)-2,6-O-bis(methoxymethylene)-4,5-bis(dimethylphosphate)-*myo*-inositol (9b)** was obtained from **7** in 72% yield analogously as described for

compound **9a**.  $[\alpha]_{20}^D = -13.0$  (*c* 0.75, CHCl<sub>3</sub>); <sup>1</sup>H NMR(400 MHz, CDCl<sub>3</sub>) δ 5.20 (m, 1H), 4.77-4.68 (m, 5H), 4.50 (d, *J* = 13.2 Hz, 1H), 4.40-4.05 (m, 13H), 3.99 (td, *J* = 9.6, 2.4 Hz, 1H), 3.78-3.73 (m, 12H), 3.37 (s, 3H), 3.36 (s, 3H), 2.77-2.71 (m, 6H), 2.29-2.22 (m, 4H), 1.55-1.51 (m, 4H), 1.21 (m, 16H), 0.81 (t, *J* = 6.8 Hz, 6H); <sup>13</sup>C NMR (101 MHz, CDCl<sub>3</sub>) δ 173.5, 173.1, 173.1, 117.1, 117.09, 117.0, 116.99, 116.8, 116.8, 99.0, 98.3, 98.27, 77.9, 75.9, 75.8, 75.8, 75.2, 75.0, 69.6, 69.5, 66.5, 66.4, 66.4, 63.3, 63.3, 63.2, 63.2, 62.8, 62.7, 62.6, 62.6, 61.8, 56.9, 56.4, 56.4, 55.3, 55.2, 55.1, 55.0, 54.9, 54.8, 54.81, 34.3, 34.2, 31.8, 29.2, 29.2, 29.12, 29.1, 25.0, 22.8, 19.9, 19.88, 19.8, 19.8, 19.7, 19.6, 19.5, 14.3; <sup>31</sup>P NMR (162 MHz, CDCl<sub>3</sub>) δ 67.47 and 67.29 (1P), 1.95 and 1.93 (1P), 1.86 and 1.83 (1P), -1.02 and -1.31 (1P); MALDI-HRMS [M + H]<sup>+</sup> calcd for C<sub>42</sub>H<sub>76</sub>N<sub>3</sub>O<sub>23</sub>P<sub>4</sub>S 1146.3540, found 1146.3556.

**1D-O-(1,2-Di-O-palmitoyl-*sn*-(2S)-glycerol-3-O-cyanoethylphospho)-3-(bis(cyano ethyl)phosphothionate)-2,6-O-bis(methoxymethylene)-4,5-bis(dimethylphosphate)-*myo*-inositol (9c)** was obtained from **7** in 87% yield analogously as described for

compound **9a**.  $[\alpha]_{20}^D = -11.3$  (*c* 0.80, CHCl<sub>3</sub>); <sup>1</sup>H NMR(400 MHz, CDCl<sub>3</sub>) δ 5.21 (m, 1H), 4.78-4.69 (m, 5H), 4.50 (d, *J* = 13.6 Hz, 1H), 4.40-4.05 (m, 13H), 3.99 (td, *J* = 9.6, 2.4 Hz, 1H), 3.79-3.74 (m, 12H), 3.37 (s, 6H), 2.80-2.72 (m, 6H), 2.29-2.22 (m, 4H), 1.55-1.51 (m, 4H), 1.19 (m, 48H), 0.81 (t, *J* = 6.8 Hz, 6H); <sup>13</sup>C NMR (101 MHz, CDCl<sub>3</sub>) δ 173.4, 173.1, 173.0, 117.1, 117.0, 116.81, 116.8, 98.9, 98.3, 98.2, 77.9, 75.8, 75.6, 75.2, 75.0, 69.5, 69.46, 66.4, 63.3, 63.27, 63.2, 62.8, 62.7, 62.66, 62.6, 61.8, 56.9, 56.4, 55.2, 55.19, 55.1, 55.0, 54.97, 54.8, 54.76, 34.3, 34.2, 32.1, 29.9, 29.8, 29.7, 29.5, 29.49, 29.3, 29.27, 25.0, 22.8, 19.9, 19.8, 19.7, 19.6, 19.5, 14.3; <sup>31</sup>P NMR (162 MHz, CDCl<sub>3</sub>) δ 67.43

and 67.23 (1P), 1.94 and 1.91 (1P), 1.84 and 1.81 (1P), -1.04 and -1.35 (1P); MALDI-HRMS  $[M + Na]^+$  calcd for  $C_{58}H_{107}N_3O_{23}P_4SNa$  1392.5864, found 1392.5876.

**1D-O-(1,2-Di-O-oleoyl-*sn*-(2S)-glycerol-3-O-cyanoethylphospho)-3-(bis(cyano ethyl)phosphothionate)-2,6-O-bis(methoxymethylene)-4,5-bis(dimethylphosphate)-*myo*-inositol (9d)** was obtained from **7** in 70% yield analogously as described for compound **9a**.  $[\alpha]_{20}^D = -9.8$  (*c* 0.77,  $CHCl_3$ );  $^1H$  NMR (400 MHz,  $CDCl_3$ )  $\delta$  5.31-5.20 (m, 5H), 4.78-4.69 (m, 5H), 4.50 (d,  $J = 13.2$  Hz, 1H), 4.48-3.95 (m, 14H), 3.79-3.74 (m, 12H), 3.37 (s, 6H), 2.78-2.72 (m, 6H), 2.29-2.23 (m, 4H), 1.94 (m, 7H), 1.73 (m, 1H), 1.55 (m, 4H), 1.19 (m, 40H), 0.81 (t,  $J = 6.8$  Hz, 6H);  $^{13}C$  NMR (101 MHz,  $CDCl_3$ )  $\delta$  173.4, 173.0, 130.2, 129.9, 117.1, 117.0, 116.8, 98.9, 98.3, 98.2, 77.9, 75.8, 75.5, 75.2, 75.0, 69.6, 69.5, 66.4, 63.3, 63.28, 63.2, 62.8, 62.7, 62.66, 62.6, 61.8, 56.9, 56.4, 55.3, 55.2, 55.1, 55.0, 54.97, 54.8, 54.77, 34.3, 34.2, 32.1, 29.9, 29.9, 29.8, 29.7, 29.6, 29.5, 29.4, 29.37, 29.3, 29.2, 27.8, 27.4, 27.35, 25.0, 22.9, 19.9, 19.86, 19.8, 19.79, 19.6, 19.6, 19.5, 14.3;  $^{31}P$  NMR (162 MHz,  $CDCl_3$ )  $\delta$  67.43 and 67.24 (1P), 1.94 and 1.91 (1P), 1.84 and 1.82 (1P), -1.04 and -1.34 (1P); MALDI-HRMS  $[M + H]^+$  calcd for  $C_{62}H_{112}N_3O_{23}P_4S$  1422.6357, found 1422.6363.

**1D-O-(1,2-Di-O-butanoyl-*sn*-(2S)-glycerol-3-phospho)-3-phosphothionate-4,5-bisphosphate-*myo*-inositol (1a).** To a solution of **9a** (16 mg, 0.015 mmol) in  $CH_3CN$  (0.5 mL) under Ar was added triethylamine (0.25 mL) followed by the addition of bis(trimethylsilyl)trifluoroacetamide (0.25 mL). After 24 h, the reaction mixture was concentrated and the residue was completely dried and dissolved in  $CH_2Cl_2$  (0.3 mL). At



0 °C, TMSBr (0.2 mL) was added to the mixture and then warmed to rt for 40 min. The solvents were removed by evaporation and then dried completely to remove the excess TMSBr. The residue was stirred with methanol (1 mL) for 1 h. After concentration, the residue was washed with CHCl<sub>3</sub> at low temperature to give **1a** (10 mg, 89%) as white solid.  $[\alpha]_{20}^D = +4.1$  (*c* 1.1, CH<sub>3</sub>OH); <sup>1</sup>H NMR(400 MHz, CD<sub>3</sub>OD) δ 5.16 (m, 1H), 4.61 (q, *J* = 9.2 Hz, 1H), 4.47 (s, 1H), 4.41-4.28 (m, 2H), 4.15-3.99 (m, 5H), 3.89 (t, *J* = 9.6 Hz, 1H), 2.27-2.19 (m, 4H), 1.57-1.50 (m, 4H), 0.88-0.83 (m, 6H); <sup>13</sup>C NMR (101 MHz, CD<sub>3</sub>OD) δ 173.7, 173.3, 79.8, 77.2, 77.1, 75.7, 70.2, 70.1, 70.0, 69.5, 65.2, 62.0, 35.7, 35.5, 18.2, 12.7; <sup>31</sup>P NMR (162 MHz, CD<sub>3</sub>OD) δ 63.77 (1P), 1.07 (1P), 0.89 (1P), -0.64 (1P); MALDI-HRMS [M - H]<sup>-</sup> calcd for C<sub>17</sub>H<sub>33</sub>O<sub>21</sub>P<sub>4</sub>S 729.0185, found 729.0162.

**1D-O-(1,2-Di-O-octanoyl-sn-(2S)-glycerol-3-phospho)-3-phosphothionate-4,5-bisphosphate-myo-inositol (1b)** was obtained from **9b** in 90% yield analogously as described for compound **1a**.  $[\alpha]_{20}^D = +4.9$  (*c* 0.77, CH<sub>3</sub>OH); <sup>1</sup>H NMR(400 MHz, CD<sub>3</sub>OD) δ 5.17 (m, 1H), 4.62 (q, *J* = 8.8 Hz, 1H), 4.48 (s, 1H), 4.41-4.28 (m, 2H), 4.15-4.00 (m, 5H), 3.92 (m, 1H), 2.28-2.22 (m, 4H), 1.54-1.50 (m, 4H), 1.22 (m, 16H), 0.81 (t, *J* = 6.4 Hz, 6H); <sup>13</sup>C NMR (101 MHz, CD<sub>3</sub>OD) δ 173.8, 173.4, 79.6, 77.0, 75.7, 70.2, 69.7, 65.1, 62.1, 33.9, 33.7, 31.7, 28.9, 24.8, 22.5, 13.3; <sup>31</sup>P NMR (162 MHz, CD<sub>3</sub>OD) δ 63.20 (1P), 0.69 (1P), 0.51 (1P), -0.67 (1P); MALDI-HRMS [M - H]<sup>-</sup> calcd for C<sub>25</sub>H<sub>49</sub>O<sub>21</sub>P<sub>4</sub>S 841.1438, found 841.1443.

**1D-O-(1,2-Di-O-palmitoyl-sn-(2S)-glycerol-3-phospho)-3-phosphothionate-4,5-bisphosphate-myo-inositol (1c)** was obtained from **9c** in 95% yield analogously as

described for compound **1a**.  $[\alpha]_{20}^D = +4.7$  (*c* 0.92, CH<sub>3</sub>OH); <sup>1</sup>H NMR(400 MHz, CD<sub>3</sub>OD/CDCl<sub>3</sub> 5:1) δ 5.18 (m, 1H), 4.63 (q, *J* = 8.8 Hz, 1H), 4.47 (s, 1H), 4.41-4.27 (m, 2H), 4.18-3.95 (m, 5H), 3.82 (m, 1H), 2.30-2.20 (m, 4H), 1.58-1.50 (m, 4H), 1.19 (m, 48H), 0.78 (t, *J* = 6.4 Hz, 6H); <sup>13</sup>C NMR (101 MHz, CD<sub>3</sub>OD/CDCl<sub>3</sub> 5:1) δ 177.8, 177.5, 83.7, 81.1, 79.6, 76.2, 74.5, 74.2, 74.0, 73.9, 73.88, 73.5, 69.2, 67.2, 66.2, 38.0, 37.9, 37.83, 37.8, 35.9, 35.89, 33.66, 33.6, 33.52, 33.5, 33.46, 33.4, 33.3, 33.31, 33.24, 33.2, 33.1, 33.0, 28.9, 28.8, 26.6, 17.52, 17.5; <sup>31</sup>P NMR (162 MHz, CD<sub>3</sub>OD/CDCl<sub>3</sub> 5:1) δ 63.66 (1P), 0.92 (1P), 0.75 (1P), -0.66 (1P); MALDI-HRMS [M - H]<sup>-</sup> calcd for C<sub>41</sub>H<sub>81</sub>O<sub>21</sub>P<sub>4</sub>S 1065.3947, found 1065.3918.

**1D-O-(1,2-Di-O-oleoyl-sn-(2S)-glycerol-3-phospho)-3-phosphothionate-4,5-**

**bisphosphate-myoinositol (1d)** was obtained from **9d** in 91% yield analogously as

described for compound **1a**.  $[\alpha]_{20}^D = +6.0$  (*c* 0.86, CH<sub>3</sub>OH); <sup>1</sup>H NMR(400 MHz, CD<sub>3</sub>OD) δ 5.24 (m, 5H), 4.59 (m, 1H), 4.47 (s, 1H), 4.41-4.31 (m, 2H), 4.18-3.95 (m, 5H), 3.90 (m, 1H), 2.26-2.20 (m, 4H), 1.93 (m, 7H), 1.69 (m, 1H), 1.51 (m, 4H), 1.20 (m, 40H), 0.78 (s, br, 6H); <sup>13</sup>C NMR (101 MHz, CD<sub>3</sub>OD) δ 177.7, 177.5, 133.7, 133.6, 83.5, 80.8, 79.6, 74.2, 73.6, 69.1, 66.4, 43.3, 38.0, 37.8, 37.7, 36.0, 35.9, 33.8, 33.7, 33.7, 33.6, 33.5, 33.4, 33.37, 33.34, 33.3, 33.26, 33.2, 33.17, 33.1, 33.08, 31.2, 31.1, 28.9, 26.7, 17.7; <sup>31</sup>P NMR (162 MHz, CD<sub>3</sub>OD) δ 62.62 (1P), 0.89 (2P), -0.60 (1P); MALDI-HRMS [M - H]<sup>-</sup> calcd for C<sub>45</sub>H<sub>85</sub>O<sub>21</sub>P<sub>4</sub>S 1117.4260, found 1117.4249.

**1D-1-O-(tert-Butyldiphenylsilyl)-2,6-O-bis(methoxymethylene)-4,5-O-(1,1,3,3-**

**tetraisopropylidisiloxanedi-1,3-yl)-myoinositol (F)** was obtained from **4** in 88% yield

analogously as described for compound **D**.  $[\alpha]_D^{20} = + 11.7$  ( $c$  0.6,  $\text{CHCl}_3$ );  $^1\text{H NMR}$  (400 MHz,  $\text{CDCl}_3$ )  $\delta$  7.70 (dd,  $J = 8.0, 1.6$  Hz, 2H), 7.63 (dd,  $J = 8.0, 1.6$  Hz, 2H), 7.36-7.26 (m, 6H), 4.94 (d,  $J = 6.4$  Hz, 1H), 4.78 (d,  $J = 6.0$  Hz, 1H), 4.53 (d,  $J = 6.8$  Hz, 1H), 4.17 (d,  $J = 6.4$  Hz, 1H), 3.86 (t,  $J = 9.6$  Hz, 1H), 3.75 (dd,  $J = 9.6, 2.4$  Hz, 1H), 3.60 (t,  $J = 9.2$  Hz, 1H), 3.41 (t,  $J = 8.4$  Hz, 1H), 3.37 (s, 3H), 3.22 (s, 3H), 3.04 (s, 1H), 2.90 (dd,  $J = 9.2, 2.0$  Hz, 2H), 1.02 (s, 9H), 1.01-0.84 (m, 28H);  $^{13}\text{C NMR}$  (101 MHz,  $\text{CDCl}_3$ )  $\delta$  136.3, 136.0, 134.5, 133.3, 130.4, 130.1, 128.1, 127.9, 98.9, 98.8, 82.3, 78.9, 78.5, 77.7, 73.67, 71.3, 56.8, 56.1, 27.4, 19.5, 17.7, 17.66, 17.65, 17.5, 17.52, 17.4, 17.3, 13.2, 12.9, 12.3, 12.2; MALDI-HRMS  $[\text{M} + \text{Na}]^+$  calcd for  $\text{C}_{38}\text{H}_{64}\text{O}_9\text{Si}_3\text{Na}$  771.3755, found 771.3761.

**1D-1-O-(tert-Butyldiphenylsilyl)-3-(dimethyl methylenephosphate)-2,6-O-bis(methoxymethylene)-4,5-O-(1,1,3,3-tetraisopropylidisiloxanedi-1,3-yl)-myo-inositol (10)**. *n*-BuLi (1.6 M in THF, 0.55 mL, 0.88 mmol) was added under Ar atmosphere to a solution of **F** (540 mg, 0.72 mmol) at  $-78$  °C. The reaction mixture was stirred for 30 min at  $-78$  °C and then added 1 mL HMPA. After 15 min, dimethyl methylenephosphate (272 mg, 1.11 mmol) was added. The reaction was stirred at  $-78$  °C for 2 h and then allowed to warm to rt and then stirred at rt for 5 h. The reaction was diluted with 200 mL EtOAc and washed with Brine and water. The organic layer was dried with  $\text{Na}_2\text{SO}_4$ , concentrated and purified by flash chromatograph (hexanes/EtOAc, 3:2) to give **10** (500 mg, 80%) as an oil.  $[\alpha]_D^{20} = + 14.8$  ( $c$  1.0,  $\text{CHCl}_3$ );  $^1\text{H NMR}$  (400 MHz,  $\text{CDCl}_3$ )  $\delta$  7.75 (dd,  $J = 8.0, 1.2$  Hz, 2H), 7.65 (dd,  $J = 8.0, 1.2$  Hz, 2H), 7.39-7.29 (m, 6H), 4.93 (d,  $J = 6.0$  Hz, 1H), 4.79 (d,  $J = 6.4$  Hz, 1H), 4.50 (d,  $J = 6.4$  Hz, 1H), 4.45 (d,  $J = 6.0$  Hz, 1H), 3.89 (t,  $J = 9.6$  Hz, 1H), 3.81 (dd,  $J = 11.6, 9.2$  Hz, 1H), 3.68 (dd,  $J =$

10.0, 1.6 Hz, 1H), 3.60 (d,  $J = 10.8$  Hz, 3H), 3.57 (d,  $J = 10.8$  Hz, 3.48-3.41 (m, 2H), 3.40 (s, 3H), 3.33-3.27 (m, 1H), 3.19 (s, 3H), 3.12 (s, 1H), 2.70 (dd,  $J = 9.6, 2.0$  Hz, 2H), 1.04 (s, 9H), 1.02-0.90 (m, 28H);  $^{31}\text{P}$  NMR (162 MHz,  $\text{CDCl}_3$ )  $\delta$  24.73 (1P);  $^{13}\text{C}$  NMR (101 MHz,  $\text{CDCl}_3$ )  $\delta$  136.5, 136.2, 134.7, 130.3, 128.2, 127.9, 98.7, 97.6, 82.1, 82.0, 78.6, 78.4, 76.3, 75.1, 73.7, 64.7, 62.5, 56.8, 55.6, 52.9, 52.8, 27.4, 19.4, 17.6, 17.6, 17.5, 17.4, 13.2, 17.0, 13.1, 12.8, 12.2, 12.1; MALDI-HRMS  $[\text{M} + \text{H}]^+$  calcd for  $\text{C}_{41}\text{H}_{72}\text{O}_{12}\text{Si}_3\text{P}$  871.4069, found 871.4064.

**1D-1-*O*-(*tert*-Butyldiphenylsilyl)-3-(dimethyl methylenephosphonate)-2,6-*O*-**

**bis(methoxymethylene)-*myo*-inositol (G).** At 0 °C TBAF (1 M in THF, 1.2 mL, 1.2 mmol) was added to inositol **10** (430 mg, 0.49 mmol) in 4 mL THF, then warmed to rt. The reaction mixture was stirred at rt for 1 h, TLC showed the end of the reaction. The reaction system was diluted with EtOAc, and washed with water, 1 N HCl, then saturated aqueous NaCl solution. The organic solvents were dried with  $\text{Na}_2\text{SO}_4$ , then concentrated and flash chromatographed (hexanes/acetone, 1:4) to afford diol **G** (280 mg, 90%).

$[\alpha]_{\text{D}}^{20} = +42.9$  ( $c$  1.2,  $\text{CHCl}_3$ );  $^1\text{H}$  NMR (400 MHz,  $\text{CDCl}_3$ )  $\delta$  7.67 (td,  $J = 8.0, 1.6$  Hz, 4H), 7.42-7.32 (m, 6H), 4.75 (d,  $J = 6.4$  Hz, 1H), 4.62 (d,  $J = 6.4$  Hz, 1H), 4.50 (d,  $J = 6.4$  Hz, 1H), 4.19 (d,  $J = 7.2$  Hz, 1H), 3.87-3.57 (m, 15H), 3.32 (s, 3H), 3.25 (s, 3H), 3.11 (t,  $J = 8.4$  Hz, 1H), 3.00 (dd,  $J = 10.0, 2.4$  Hz, 1H), 1.04 (s, 9H);  $^{31}\text{P}$  NMR (162 MHz,  $\text{CDCl}_3$ )  $\delta$  25.10 (1P);  $^{13}\text{C}$  NMR (101 MHz,  $\text{CDCl}_3$ )  $\delta$  136.1, 135.9, 134.1, 133.7, 130.2, 129.8, 127.9, 127.7, 98.4, 97.7, 84.5, 82.0, 81.9, 75.1, 74.2, 73.2, 72.7, 64.3, 62.7, 55.8, 55.79, 53.4, 53.36, 53.2, 53.1, 27.2, 19.5; MALDI-HRMS  $[\text{M} + \text{Na}]^+$  calcd for  $\text{C}_{29}\text{H}_{45}\text{O}_{11}\text{PSiNa}$  651.2361, found 651.2343.

**1D-1-*O*-(*tert*-Butyldiphenylsilyl)-3-(dimethylmethylenephosphonate)-2,6-*O*-**

**bis(methoxymethylene)-4,5-bis(dimethylphosphate)-*myo*-inositol (11).** A solution of diol **G** (210 mg, 0.33 mmol) and 1-*H* tetrazole (80 mg, 1.0 mmol) in CH<sub>2</sub>Cl<sub>2</sub> (4 mL) was treated with dimethyl *N,N*-diisopropylphosphoramidite (0.3 mL, 1.38 mmol) under Ar. After 12 h the result mixture was cooled to – 20 °C and treated with *m*-CPBA (460 mg). After warm-up to rt, saturated aqueous Na<sub>2</sub>S<sub>2</sub>O<sub>3</sub> and NaHCO<sub>3</sub> were added and stirred for 30 min. The reaction mixture was extracted with CH<sub>2</sub>Cl<sub>2</sub> and dried with Na<sub>2</sub>SO<sub>4</sub>. The organic phase was concentrated, and the residue was chromatographed on silica gel (MeOH/acetone, 1:2) giving pure product **11** (270 mg, 95%) as a liquid.  $[\alpha]_D^{20} = + 13.8$  (*c* 1.1, CHCl<sub>3</sub>); <sup>1</sup>H NMR (400 MHz, CDCl<sub>3</sub>) δ 7.67 (dd, *J* = 8.0, 1.6 Hz, 2H), 7.62 (dd, *J* = 8.0, 1.6 Hz, 2H), 7.38-7.28 (m, 6H), 4.97 (d, *J* = 6.0 Hz, 1H), 4.76 (d, *J* = 6.4 Hz, 1H), 4.55 (t, *J* = 9.2 Hz, 1H), 4.50 (d, *J* = 6.4 Hz, 1H), 4.40 (d, *J* = 6.8 Hz, 1H), 4.22-4.16 (m, 1H), 4.04 (t, *J* = 9.6 Hz, 1H), 3.77-3.57 (m, 18H), 3.42 (s, 3H), 3.21-3.14 (m, 5H), 3.10 (s, 1H), 2.84 (dd, *J* = 10.0, 2.0 Hz, 1H), 1.04 (s, 9H); <sup>31</sup>P NMR (162 MHz, CDCl<sub>3</sub>) δ 23.27 (1P), 1.67 (1P), 1.09 (1P); <sup>13</sup>C NMR (101 MHz, CDCl<sub>3</sub>) δ 136.2, 136.1, 134.2, 132.5, 130.5, 130.2, 128.3, 128.0, 98.9, 97.6, 80.0, 79.8, 79.0, 78.9, 78.89, 78.0, 76.1, 73.5, 73.2, 63.6, 62.0, 57.2, 55.9, 54.8, 54.7, 54.6, 54.5, 54.46, 54.4, 53.43, 53.36, 53.0, 52.9, 27.4, 19.3; MALDI-HRMS [M + Na]<sup>+</sup> calcd for C<sub>33</sub>H<sub>55</sub>O<sub>17</sub>P<sub>3</sub>SiNa 867.2314, found 867.2324.

**1D-3-(dimethylmethylenephosphonate)-2,6-*O*-bis(methoxymethylene)-4,5-**

**bis(dimethylphosphate)-*myo*-inositol (H).** Phosphonate **11** (270 mg, 0.32 mmol) was

dissolved in 3 mL DMF, to the mixture was added TBAF•3H<sub>2</sub>O (168 mg, 0.53 mmol), stirred at room temperature for 3 h. The mixture was concentrated, the crude product was chromatographed on silica gel (MeOH/acetone, 1:2) to give phosphonate **H** (145 mg, 75%) as colorless oil.  $[\alpha]_D^{20} = -18.7$  (*c* 1.2, CHCl<sub>3</sub>); <sup>1</sup>H NMR (400 MHz, CDCl<sub>3</sub>) δ 4.78 (d, *J* = 6.8 Hz, 1H), 4.75-4.70 (m, 3H), 4.65 (d, *J* = 7.2 Hz, 1H), 4.30 (t, *J* = 8.8 Hz, 1H), 4.23 (s, 1H), 4.01-3.87 (m, 2H), 3.79-3.67 (m, 19H), 3.45 (dd, *J* = 9.2, 2.4 Hz, 2H), 3.41 (s, 3H), 3.38 (s, 3H); <sup>31</sup>P NMR (162 MHz, CDCl<sub>3</sub>) δ 24.01 (1P), 1.65 (1P), 1.53 (1P); <sup>13</sup>C NMR (101 MHz, CDCl<sub>3</sub>) δ 99.1, 98.0, 83.2, 80.4, 80.3, 79.2, 79.15, 79.1, 78.0, 77.99, 77.9, 74.4, 70.3, 65.1, 63.4, 56.4, 56.0, 54.9, 54.87, 54.86, 54.8, 54.6, 54.59, 54.5, 54.4, 53.3, 53.2, 53.16; MALDI-HRMS [M + Na]<sup>+</sup> calcd for C<sub>17</sub>H<sub>37</sub>O<sub>17</sub>P<sub>3</sub>Na 629.1136, found 629.1144.

**1D-O-(1,2-Di-O-butanoyl-*sn*-(2S)-glycerol-3-O-cyanoethylphospho)-3-(dimethylmethylenephosphonate)-2,6-O-bis(methoxymethylene)-4,5-**

**bis(dimethylphosphate)-*myo*-inositol (12a)** was obtained from **H** in 68% yield analogously as described for compound **9a**.  $[\alpha]_D^{20} = -28.0$  (*c* 0.6, CHCl<sub>3</sub>); <sup>1</sup>H NMR (400 MHz, CDCl<sub>3</sub>) δ 5.27 (m, 1H), 4.85 (d, *J* = 7.2 Hz, 1H), 4.79-4.67 (m, 4H), 4.47 (m, 1H), 4.37-4.25 (m, 5H), 4.24-3.96 (m, 5H), 3.94-3.87 (m, 1H), 3.82-3.74 (m, 18 H), 3.44 (t, *J* = 2.4 Hz, 1H), 3.41 (s, 3H), 3.37 (s, 3H), 2.80 (q, *J* = 5.6 Hz, 2H), 2.33-2.26 (m, 4H), 1.66-1.58 (m, 4H), 0.92 (m, 6H); <sup>31</sup>P NMR (162 MHz, CDCl<sub>3</sub>) δ 23.86 (d, 1P), 1.83 (d, 1P), 1.71 (d, 1P), -1.05 and -1.36 (1P); <sup>13</sup>C NMR (101 MHz, CDCl<sub>3</sub>) δ 173.3, 172.9, 116.9, 116.8, 99.0, 98.97, 98.1, 98.0, 80.6, 80.5, 78.8, 76.5, 76.3, 75.9, 75.7, 73.8, 73.7, 69.58, 69.56, 69.51, 69.47, 66.45, 66.40, 66.28, 66.22, 65.82, 64.17, 62.58, 62.53, 62.51,

62.46, 61.68, 57.03, 57.00, 56.92, 56.16, 56.13, 55.04, 55.02, 54.97, 54.96, 54.72, 54.65, 54.60, 53.28, 53.22, 36.18, 36.03, 19.86, 19.83, 19.79, 19.75, 18.50, 13.82, 13.78;

MALDI-HRMS  $[M + Na]^+$  calcd for  $C_{31}H_{59}O_{24}NP_4Na$  976.2270, found 976.2293.

**1D-O-(1,2-Di-O-octanoyl-*sn*-(2S)-glycerol-3-O-cyanoethylphospho)-3-(dimethylmethylenephosphonate)-2,6-O-bis(methoxymethylene)-4,5-**

**bis(dimethylphosphate)-*myo*-inositol (12b)** was obtained from **H** in 66% yield

analogously as described for compound **9a**.  $[\alpha]_D^{20} = -19.9$  (*c* 0.5,  $CHCl_3$ );  $^1H$  NMR (400 MHz,  $CDCl_3$ )  $\delta$  5.26 (m, 1H), 4.84 (d, *J* = 7.2 Hz, 1H), 4.79-4.66 (m, 4H), 4.46 (s, 1H), 4.35-4.25 (m, 5H), 4.24-3.96 (m, 5H), 3.90 (dd, *J* = 14.0, 8.0 Hz, 1H), 3.81-3.75 (m, 18 H), 3.44 (m, 1H), 3.41 (s, 3H), 3.37 (s, 3H), 2.80 (q, *J* = 5.6 Hz, 2H), 2.33-2.26 (m, 4H), 1.57 (q, *J* = 6.8 Hz, 4H), 1.25 (m, 16H), 0.84 (t, *J* = 6.8 Hz, 6H);  $^{31}P$  NMR (162 MHz,  $CDCl_3$ )  $\delta$  23.88 (d, 1P), 1.81 (d, 1P), 1.69 (d, 1P), -1.04 and -1.33 (1P);  $^{13}C$  NMR (101 MHz,  $CDCl_3$ )  $\delta$  173.5, 173.1, 116.9, 116.8, 99.0, 98.9, 98.1, 98.0, 80.5, 80.4, 78.7, 76.5, 76.4, 76.3, 76.2, 76.0, 75.7, 73.9, 73.8, 69.55, 69.50, 69.47, 66.4, 66.38, 66.3, 66.2, 65.8, 64.2, 62.6, 62.6, 62.55, 62.50, 61.7, 57.0, 56.99, 56.2, 56.1, 55.0, 55.02, 54.97, 54.96, 54.7, 54.67, 54.6, 53.3, 53.2, 34.3, 34.2, 31.8, 29.2, 29.22, 29.1, 29.11, 25.03, 25.01, 22.8, 19.86, 19.8, 19.78, 19.7, 14.3; MALDI-HRMS  $[M + Na]^+$  calcd for  $C_{39}H_{75}O_{24}NP_4Na$  1088.3522, found 1088.3499.

**1D-O-(1,2-Di-O-palmitoyl-*sn*-(2S)-glycerol-3-O-cyanoethylphospho)-3-(dimethylmethylenephosphonate)-2,6-O-bis(methoxymethylene)-4,5-**

**bis(dimethylphosphate)-*myo*-inositol (12c)** was obtained from **H** in 78% yield

analogously as described for compound **9a**.  $[\alpha]_D^{20} = -14.1$  (*c* 0.5,  $CHCl_3$ );  $^1H$  NMR (400

MHz, CDCl<sub>3</sub>) δ 5.25 (m, 1H), 4.84 (d, *J* = 6.8 Hz, 1H), 4.77-4.66 (m, 4H), 4.46 (m, 1H), 4.35-3.97 (m, 10H), 3.91 (dd, *J* = 14.0, 8.0 Hz, 1H), 3.78 (m, 18 H), 3.44 (m, 1H), 3.41 (s, 3H), 3.37 (s, 3H), 2.80 (q, *J* = 6.0 Hz, 2H), 2.33-2.26 (m, 4H), 1.57 (q, *J* = 6.8 Hz, 4H), 1.23 (m, 48H), 0.84 (t, *J* = 6.8 Hz, 6H); <sup>31</sup>P NMR (162 MHz, CDCl<sub>3</sub>) δ 23.92 (d, 1P), 1.76 (d, 1P), 1.66 (s, 1P), -1.08 and -1.39 (1P); <sup>13</sup>C NMR (101 MHz, CDCl<sub>3</sub>) δ 173.4, 173.1, 116.85, 116.8, 99.0, 98.96, 98.1, 98.0, 80.5, 80.4, 78.8, 76.3, 75.9, 75.7, 73.8, 73.7, 69.5, 66.4, 66.3, 65.7, 64.1, 62.6, 62.5, 62.49, 61.7, 57.0, 56.99, 56.2, 56.1, 55.0, 54.98, 54.96, 54.7, 54.67, 54.6, 53.3, 53.2, 34.3, 34.2, 32.1, 29.9, 29.8, 29.7, 29.6, 29.5, 29.49, 29.3, 29.31, 25.0, 22.9, 19.8, 19.78, 14.3; MALDI-HRMS [M + Na]<sup>+</sup> calcd for C<sub>55</sub>H<sub>107</sub>O<sub>24</sub>NP<sub>4</sub>Na 1312.6026, found 1312.6058.

**1D-O-(1,2-Di-O-oleoyl-*sn*-(2S)-glycerol-3-O-cyanoethylphospho)-3-**

**(dimethylmethylenephosphonate)-2,6-O-bis(methoxymethylene)-4,5-**

**bis(dimethylphosphate)-*myo*-inositol (12d)** was obtained from **H** in 72% yield

analogously as described for compound **9a**. [ $\alpha$ ]<sub>D</sub><sup>20</sup> = - 15.0 (*c* 0.3, CHCl<sub>3</sub>); <sup>1</sup>H NMR (400 MHz, CDCl<sub>3</sub>) δ 5.36-5.30 (m, 4H), 5.27 (m, 1H), 4.85 (d, *J* = 6.8 Hz, 1H), 4.78-4.67 (m, 4H), 4.49 (m, 1H), 4.36-3.98 (m, 10H), 3.92 (dd, *J* = 14.0, 7.6 Hz, 1H), 3.79 (m, 18 H), 3.47 (m, 1H), 3.42 (s, 3H), 3.39 (s, 3H), 2.81 (q, *J* = 6.4 Hz, 2H), 2.30 (q, *J* = 7.6 Hz, 4H), 1.98 (m, 6H), 1.78 (m, 1H), 1.58 (m, 5H), 1.24 (m, 40H), 0.86 (t, *J* = 7.2 Hz, 6H); <sup>31</sup>P NMR (162 MHz, CDCl<sub>3</sub>) δ 23.91 (d, 1P), 1.79 (s, 1P), 1.59 (s, 1P), -1.04 and -1.39 (1P); <sup>13</sup>C NMR (101 MHz, CDCl<sub>3</sub>) δ 173.4, 173.1, 130.2, 129.9, 129.89, 116.9, 116.8, 99.0, 98.97, 98.1, 98.0, 80.5, 80.4, 78.8, 76.5, 76.4, 76.3, 76.0, 75.8, 73.9, 69.6, 69.5, 66.4, 65.8, 64.1, 62.5, 61.8, 59.2, 57.0, 57.0, 56.2, 56.1, 55.1, 55.0, 54.8, 54.7, 54.6, 53.4,



39.4, 39.37, 34.3, 34.2, 32.8, 32.79, 32.1, 32.06, 30.0, 29.9, 29.9, 29.8, 29.7, 29.6, 29.5, 29.4, 29.43, 29.36, 29.3, 29.29, 29.2, 27.8, 27.4, 27.39, 25.0, 22.9, 19.9, 19.85, 19.80, 19.77, 14.3; MALDI-HRMS  $[M + Na]^+$  calcd for  $C_{59}H_{111}O_{24}NP_4Na$  1364.6339, found 1364.6318.

**1D-O-(1,2-Di-O-butanoyl-*sn*-(2S)-glycerol)-3-methylenephosphonate-4,5-**

**bisphosphate-*myo*-inositol (2a)** was obtained from **12a** in 92% yield analogously as

described for compound **1a**.  $[\alpha]_D^{20} = + 3.6$  ( $c$  0.5,  $CH_3OH$ );  $^1H$  NMR (400 MHz,  $CD_3OD$ )  $\delta$  5.18 (m, 1H), 4.54 (q,  $J = 9.6$  Hz, 1H), 4.37-4.28 (m, 2H), 4.15-4.01 (m, 5H), 3.91 (m, 2H), 3.75 (t,  $J = 11.2$  Hz, 1H), 3.46 (d,  $J = 10.0$  Hz, 1H), 2.27-2.20 (m, 4H), 1.58-1.51 (m, 4H), 0.86 (m, 6H);  $^{31}P$  NMR (162 MHz,  $CD_3OD$ )  $\delta$  20.58 (s, 1P), 0.62 (s, 1P), 0.28 (s, 1P), -0.50 (s, 1P);  $^{13}C$  NMR (101 MHz,  $CD_3OD$ )  $\delta$  178.6, 84.6, 84.5, 83.7, 81.7, 81.1, 76.6, 75.7, 74.9, 74.6, 74.1, 72.5, 71.9, 71.3, 70.0, 69.2, 68.4, 67.1, 65.5, 65.2, 39.4, 22.2, 16.6; MALDI-HRMS  $[M - H]^-$  calcd for  $C_{18}H_{35}O_{22}P_4$  727.0570, found 727.0605.

**1D-O-(1,2-Di-O-octanoyl-*sn*-(2S)-glycerol)-3-methylenephosphonate-4,5-**

**bisphosphate-*myo*-inositol (2b)** was obtained from **12b** in 96% yield analogously as

described for compound **1a**.  $[\alpha]_D^{20} = + 3.4$  ( $c$  0.5,  $CH_3OH$ );  $^1H$  NMR (400 MHz,  $CD_3OD$ )  $\delta$  5.17 (m, 1H), 4.52 (q,  $J = 9.2$  Hz, 1H), 4.36-4.28 (m, 2H), 4.14-4.00 (m, 5H), 3.92 (m, 2H), 3.72 (dd,  $J = 12.8, 10.4$  Hz, 1H), 3.43 (dd,  $J = 10.0, 2.4$  Hz, 1H), 2.28-2.21 (m, 4H), 1.51 (m, 4H), 1.22 (m, 16H), 0.80 (t,  $J = 6.8$  Hz, 6H);  $^{31}P$  NMR (162 MHz,  $CD_3OD$ )  $\delta$  21.06 (s, 1P), 0.90 (s, 1P), 0.88 (s, 1P), -0.54 (s, 1P);  $^{13}C$  NMR (101 MHz,

CD<sub>3</sub>OD)  $\delta$  177.7, 177.3, 84.7, 84.6, 83.8, 81.7, 81.4, 81.3, 74.0, 73.9, 71.2, 70.0, 69.2, 69.1, 68.3, 66.0, 37.8, 37.6, 37.5, 35.6, 32.9, 32.9, 32.8, 28.8, 28.7, 26.4, 26.41, 17.2; MALDI-HRMS [M - H]<sup>-</sup> calcd for C<sub>26</sub>H<sub>51</sub>O<sub>22</sub>P<sub>4</sub> 839.1822, found 839.1819.

**1D-O-(1,2-Di-O-palmitoyl-*sn*-(2S)-glycerol)-3-methylenephosphonate-4,5-**

**bisphosphate-*myo*-inositol (2c)** was obtained from **12c** in 90% yield analogously as described for compound **1a**.  $[\alpha]_D^{20} = + 2.2$  (*c* 0.95, CH<sub>3</sub>OH/CHCl<sub>3</sub> 1:1); <sup>1</sup>H NMR (400 MHz, CD<sub>3</sub>OD/CDCl<sub>3</sub> 3:1)  $\delta$  5.20-5.17 (m, 1H), 4.52 (q, *J* = 9.2 Hz, 1H), 4.34-4.28 (m, 2H), 4.14-4.00 (m, 5H), 3.90 (m, 2H), 3.77-3.67 (m, 1H), 3.56-3.38 (m, 2H), 2.27-2.18 (m, 4H), 1.51 (m, 4H), 1.17 (m, 48H), 0.78 (t, *J* = 6.8 Hz, 6H); <sup>31</sup>P NMR (162 MHz, CD<sub>3</sub>OD/CDCl<sub>3</sub> 3:1)  $\delta$  20.29 (s, 1P), 0.42 (br, 2P), -0.61 (s, 1P); <sup>13</sup>C NMR (101 MHz, CD<sub>3</sub>OD/CDCl<sub>3</sub> 3:1)  $\delta$  177.9, 177.5, 84.6, 84.4, 83.6, 81.1, 74.4, 74.2, 74.0, 73.9, 71.3, 70.1, 69.2, 68.5, 67.2, 66.2, 38.0, 37.9, 37.8, 35.91, 35.9, 33.7, 33.6, 33.6, 33.58, 33.5, 33.46, 33.4, 33.3, 33.31, 33.2, 33.21, 33.1, 33.07, 33.0, 28.9, 26.6, 17.6; MALDI-HRMS [M - H]<sup>-</sup> calcd for C<sub>42</sub>H<sub>83</sub>O<sub>22</sub>P<sub>4</sub> 1063.4332, found 1063.4382.

**1D-O-(1,2-Di-O-oleoyl-*sn*-(2S)-glycerol)-3-methylenephosphonate-4,5-bisphosphate-**

***myo*-inositol (2d)** was obtained from **12d** in 95% yield analogously as described for compound **1a**.  $[\alpha]_D^{20} = + 1.7$  (*c* 0.4, CH<sub>3</sub>OH); <sup>1</sup>H NMR (400 MHz, CD<sub>3</sub>OD)  $\delta$  5.29-5.12 (m, 5H), 4.53 (q, *J* = 9.2 Hz, 1H), 4.36-4.29 (m, 2H), 4.17-3.99 (m, 5H), 3.96-3.88 (m, 2H), 3.72 (t, *J* = 10.8 Hz, 1H), 3.43 (dd, *J* = 9.6, 2.4 Hz, 1H), 2.27-2.19 (m, 4H), 1.94-1.93 (m, 6H), 1.70 (m, 1H), 1.50 (m, 5H), 1.20 (m, 40H), 0.80 (t, *J* = 6.0 Hz, 6H); <sup>31</sup>P NMR (162 MHz, CD<sub>3</sub>OD)  $\delta$  21.05 (s, 1P), 0.92 (s, 1P), 0.90 (s, 1P), -0.53 (s, 1P); <sup>13</sup>C

NMR (101 MHz, CD<sub>3</sub>OD)  $\delta$  177.6, 177.3, 133.7, 133.5, 84.8, 84.6, 83.8, 81.7, 81.3, 74.0, 71.2, 70.0, 68.3, 67.1, 66.0, 62.4, 43.1, 37.8, 37.6, 37.6, 35.8, 35.8, 33.6, 33.6, 33.5, 33.4, 33.37, 33.3, 33.2, 33.19, 33.1, 33.0, 32.98, 32.94, 32.9, 31.4, 30.9, 30.88, 30.8, 28.8, 17.3; MALDI-HRMS [M - H]<sup>-</sup> calcd for C<sub>46</sub>H<sub>88</sub>O<sub>22</sub>P<sub>4</sub> 1115.4645, found 1115.4646.

### **Experimental determination and evaluation of sodium transport (I<sub>Na+</sub>, $\mu$ A/cm<sup>2</sup>).<sup>1</sup>**

Briefly, A6 cells were subcultured onto 24-mm Millicell inserts (Millipore, Bedford, MA) for 10 days and the day before the experiment, incubated overnight in a serum-free 260 mosmol/kg H<sub>2</sub>O amphibian Ringer solution. DiC<sub>16</sub>-PtdIns(3,4,5)P<sub>3</sub>, analogue **1c** and analogue **2c** (50  $\mu$ M) were complexed by histone H1 carrier (50  $\mu$ M) and then added to the apical side of the monolayer. Results were compared with insulin basolateral stimulation (100 nM) and control (histone H1 alone). This experiment is representative of three independent experiments.

**Binding of analogues 1b and 2b to Grp1.**<sup>2</sup> Competitive displacement of biotinylated-PtdIns(3,4,5)P<sub>3</sub> (10 nM) from Grp1 (10 nM) binding by diC<sub>8</sub>-PtdIns(3,4,5)P<sub>3</sub> and analogues **1b** and **2b** (4000, 800, 160, 32, 6.4, 1.28 nM) in 50 mM Tris pH 7.5, 150 mM NaCl, 0.1% Tween-20, 0.1% BSA. Alphascreen<sup>®</sup> assays were performed on a Fusion instrument (Perkin Elmer, Inc.) using standard settings and the recommended buffer (50 mM Tris pH 7.5, 150 mM NaCl, 0.1% Tween-20, 0.1% BSA). In a 384-well microplate was added 5  $\mu$ L buffer followed by 5  $\mu$ L each of the Grp1 PH domain (50 nM), biotinylated PtdIns(3,4,5)P<sub>3</sub> (50 nM), and the respective competitor (20, 4, 0.8, 0.16, 0.032, 0.0064  $\mu$ M). A solution of anti-GST acceptor beads and streptavidin donor beads

(5  $\mu$ L, 100  $\mu$ g/mL) was added, the plate gently shaken and stored for 2 hours in the dark, and read on the Fusion instrument.

- (1) Markadieu, N.; Blero, D.; Boom, A.; Erneux, C.; Beauwens, R. *Am. J. Physiol. Renal. Physiol.* **2004**, 287, F319-328.
- (2) Drees, B. E.; Weipert, A.; Hudson, H.; Ferguson, C. G.; Chakravarty, L.; Prestwich, G. D. *Comb. Chem. High Throughput Screen* **2003**, 6, 321-330.

**PTEN Malachite Green Assay Protocol.** This experimental procedure was adapted from the PTEN Malachite Green assay protocol (Echelon Biosciences, Inc.), and the reaction buffer was also prepared according to this protocol. The PTEN enzyme reactions were performed in triplicate wells using the amounts in the table below. The buffer and enzyme were added first, and then the addition of the substrate solution (diC<sub>8</sub>-PI(3,4,5)P<sub>3</sub>, **1b** or **2b**) initiated the reaction. The plates were sealed to prevent evaporation, mixed on plate shaker for 30 sec, and then incubated at 37 °C for 15 min. The enzyme reaction was quenched by addition of 100  $\mu$ l/well of Malachite Green solution to each well of reactions of the table above. The plate was re-sealed, covered with Al foil to protect from light, and then incubated on a plate shaker for 15 min at rt to develop color. The absorbance was read at 620 nm, and the relative absorbances are shown in Supplementary Figure 3 (Page S4).

| Sample                      | Reaction buffer, $\mu$ l | PTEN (20 ng/ $\mu$ l), $\mu$ l | Substrate (1 mM), $\mu$ l | Reaction volume, $\mu$ l |
|-----------------------------|--------------------------|--------------------------------|---------------------------|--------------------------|
| <b>PTEN+PIP<sub>3</sub></b> | 17                       | 5                              | 3                         | 25                       |
| <b>PTEN+1b</b>              | 17                       | 5                              | 3                         | 25                       |
| <b>PTEN+2b</b>              | 17                       | 5                              | 3                         | 25                       |
| <b>Background 1</b>         | 25                       | 0                              | 0                         | 25                       |
| <b>Background 2</b>         | 20                       | 5                              | 0                         | 25                       |
| <b>Background 3</b>         | 22                       | 0                              | 3 (PIP <sub>3</sub> )     | 25                       |
| <b>Background 4</b>         | 22                       | 0                              | 3 ( <b>1b</b> )           | 25                       |
| <b>Background 5</b>         | 22                       | 0                              | 3 ( <b>2b</b> )           | 25                       |



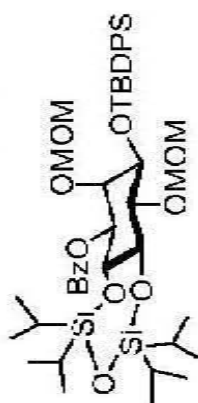

4

$^{13}\text{C}$  NMR (101 MHz,  $\text{CDCl}_3$ )

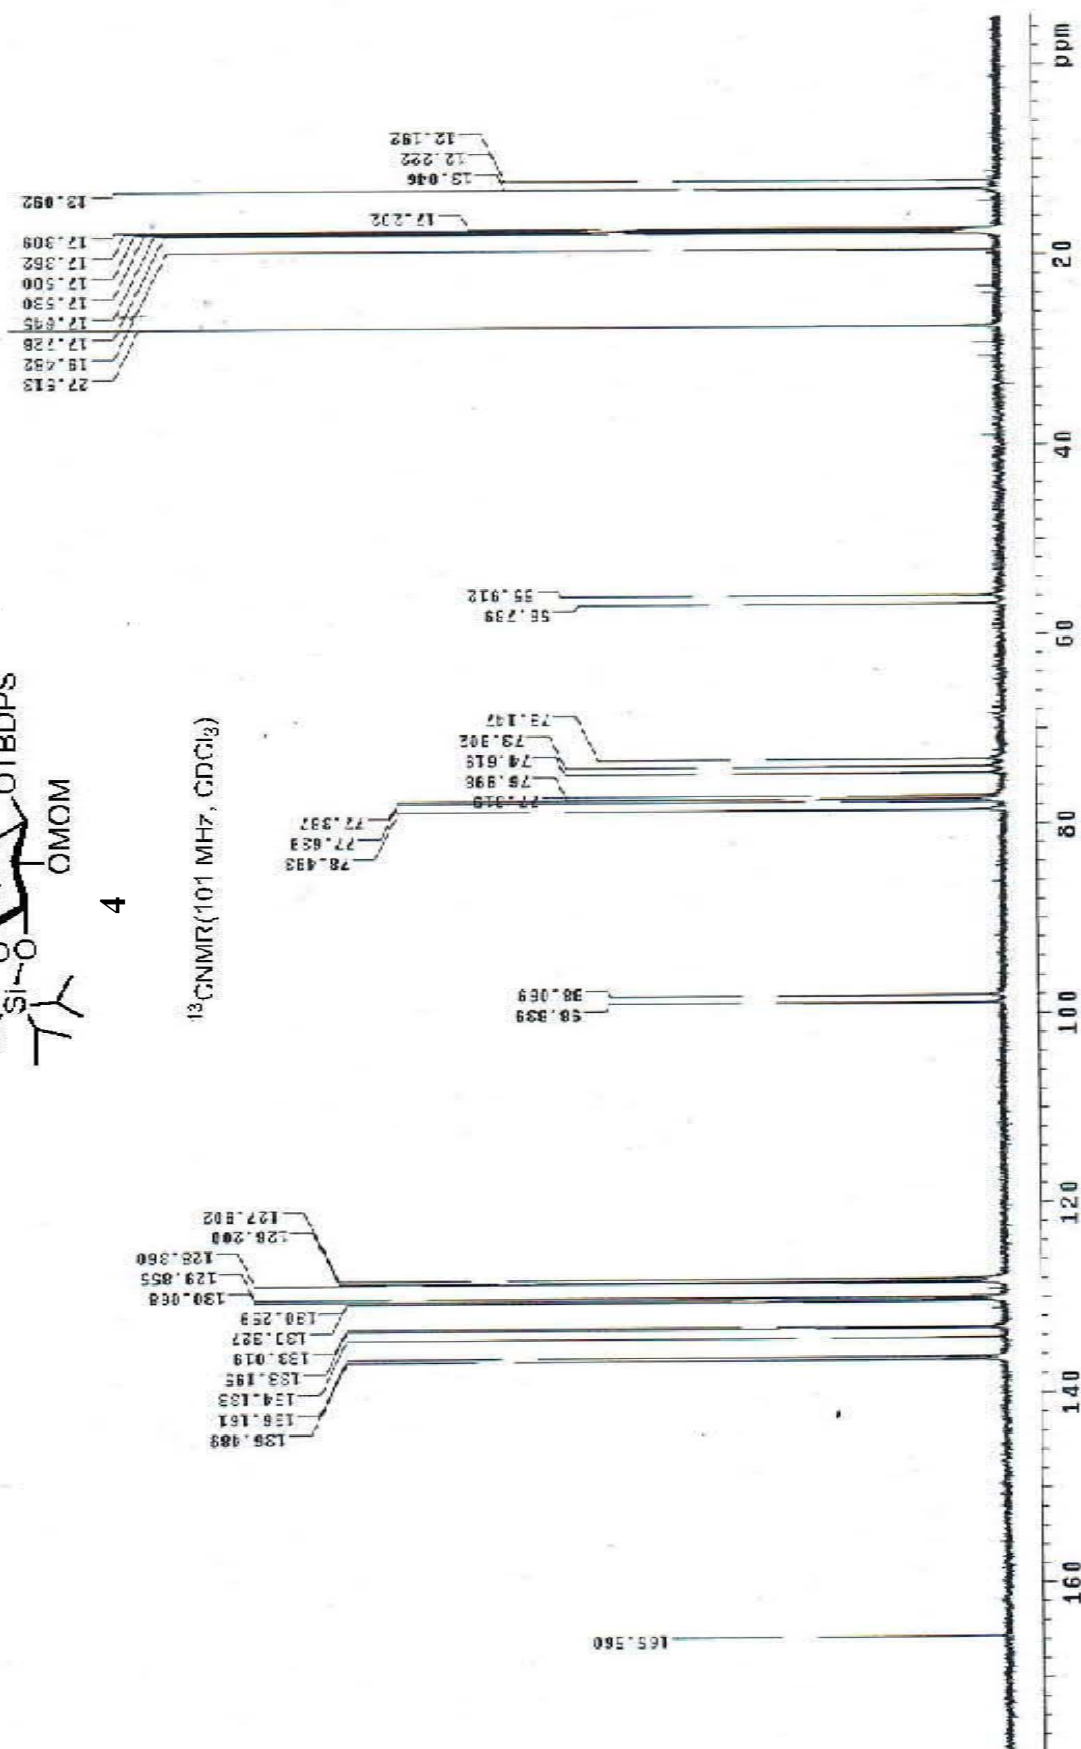

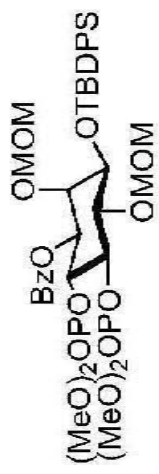

5

<sup>1</sup>H NMR (400 MHz, CDCl<sub>3</sub>)

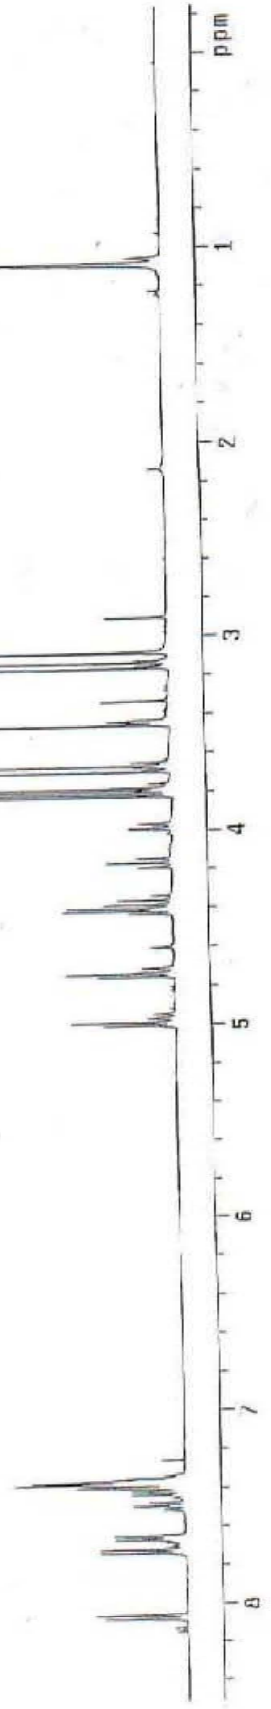

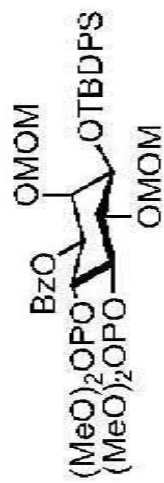

5

<sup>31</sup>P NMR (162 MHz, CDCl<sub>3</sub>)

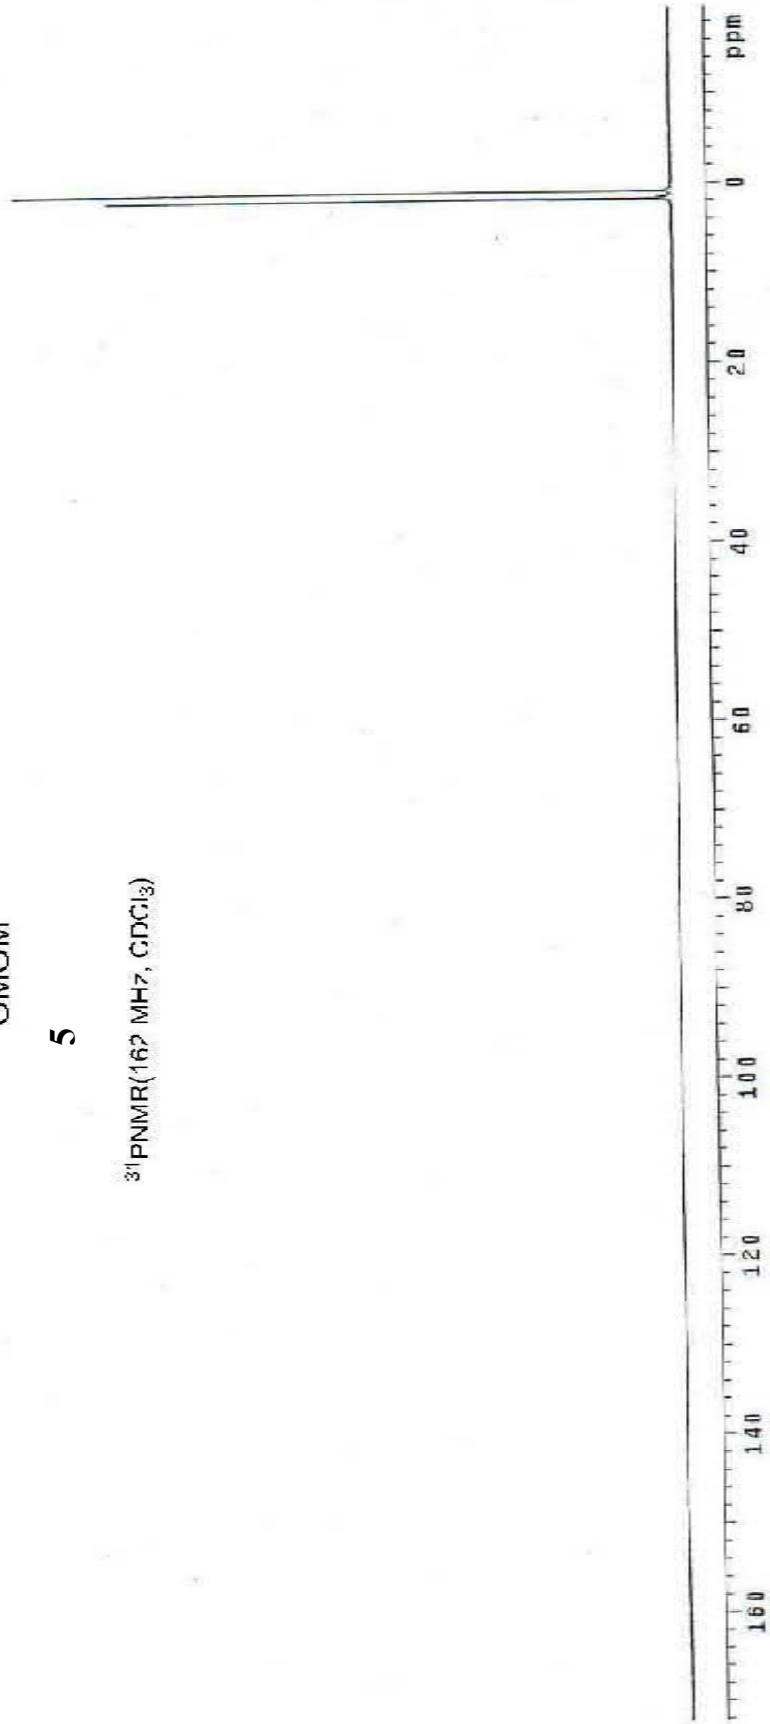



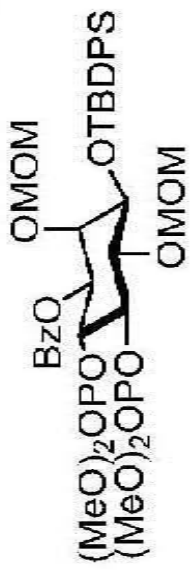

5

<sup>13</sup>CNMR (101 MHz, CDCl<sub>3</sub>)

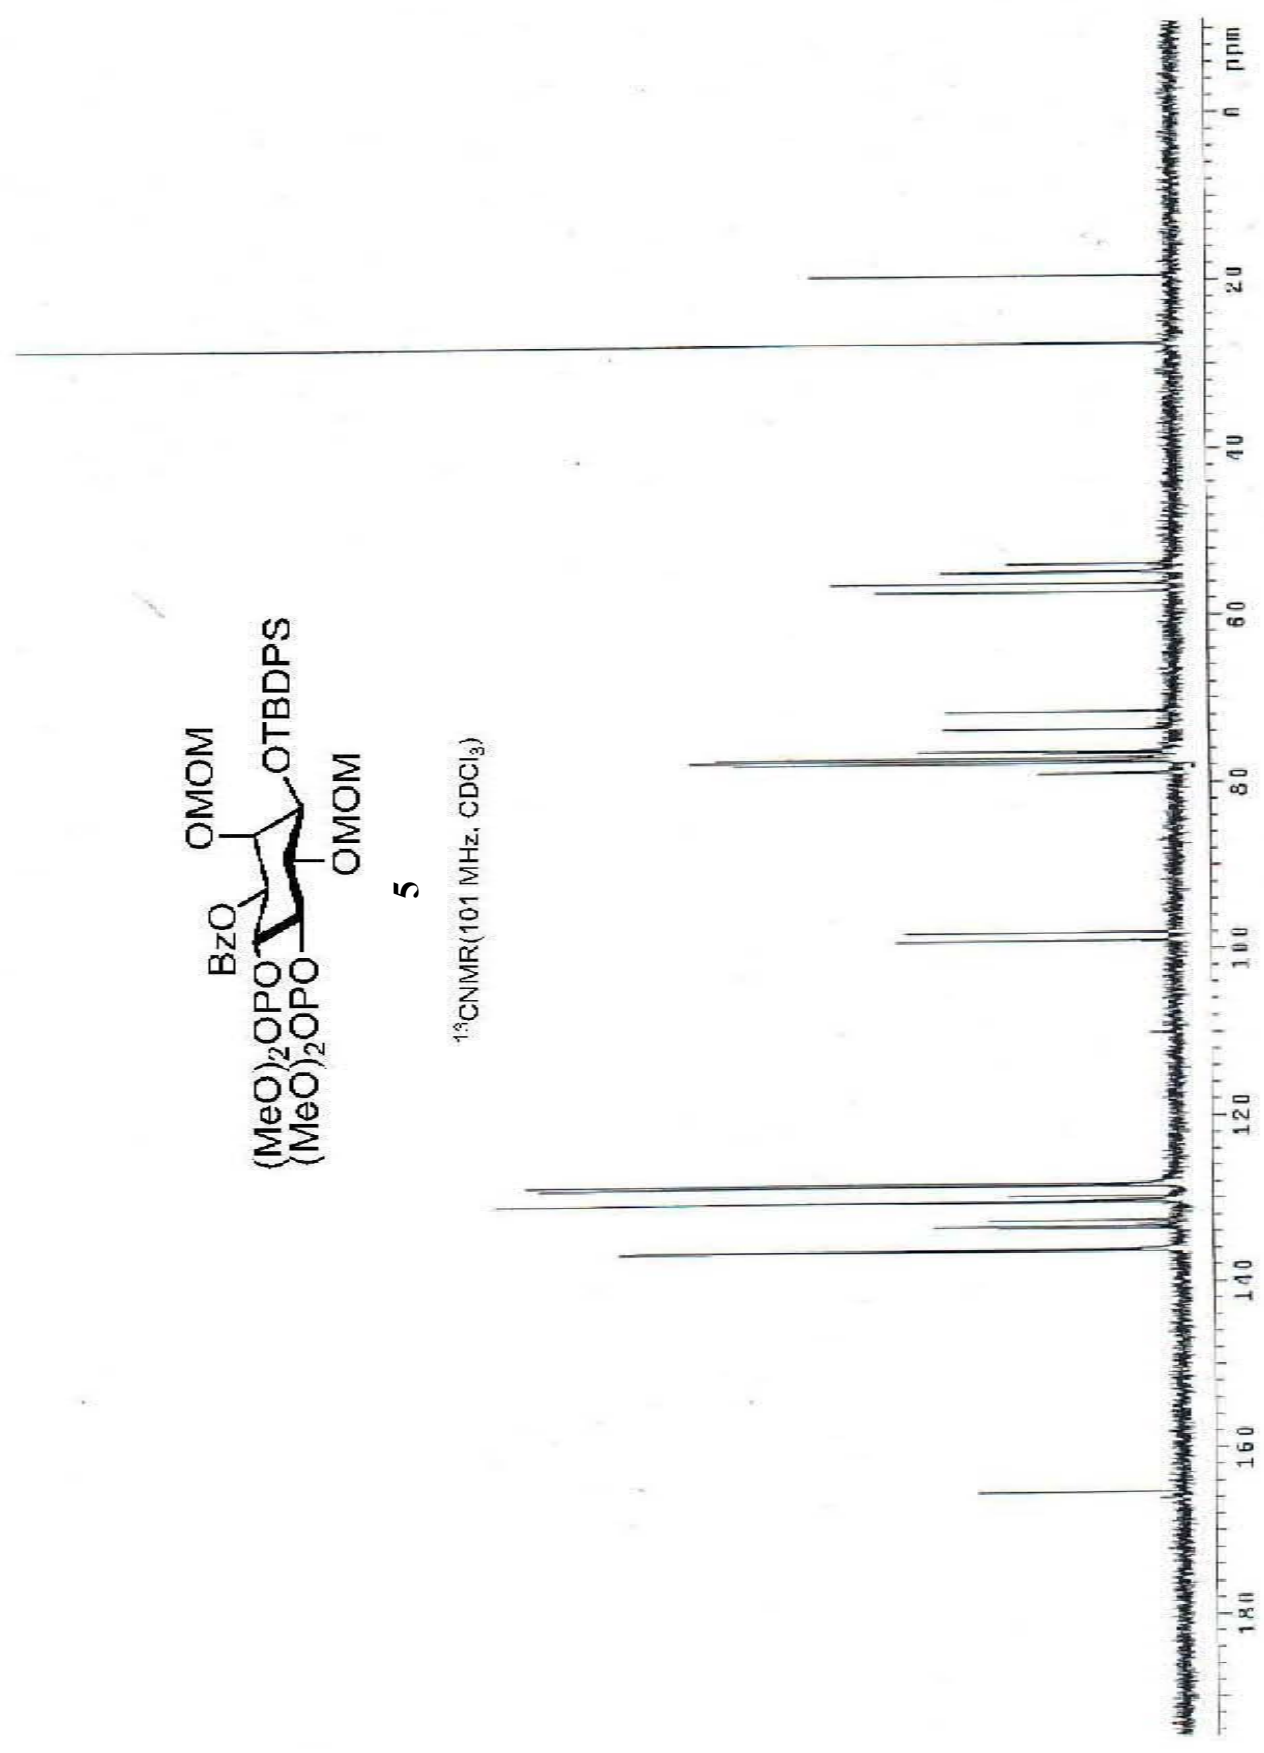

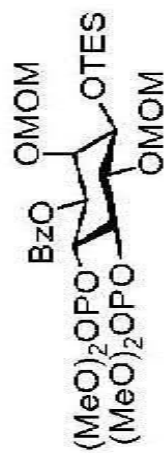

6

<sup>1</sup>H NMR (400 MHz, CDCl<sub>3</sub>)

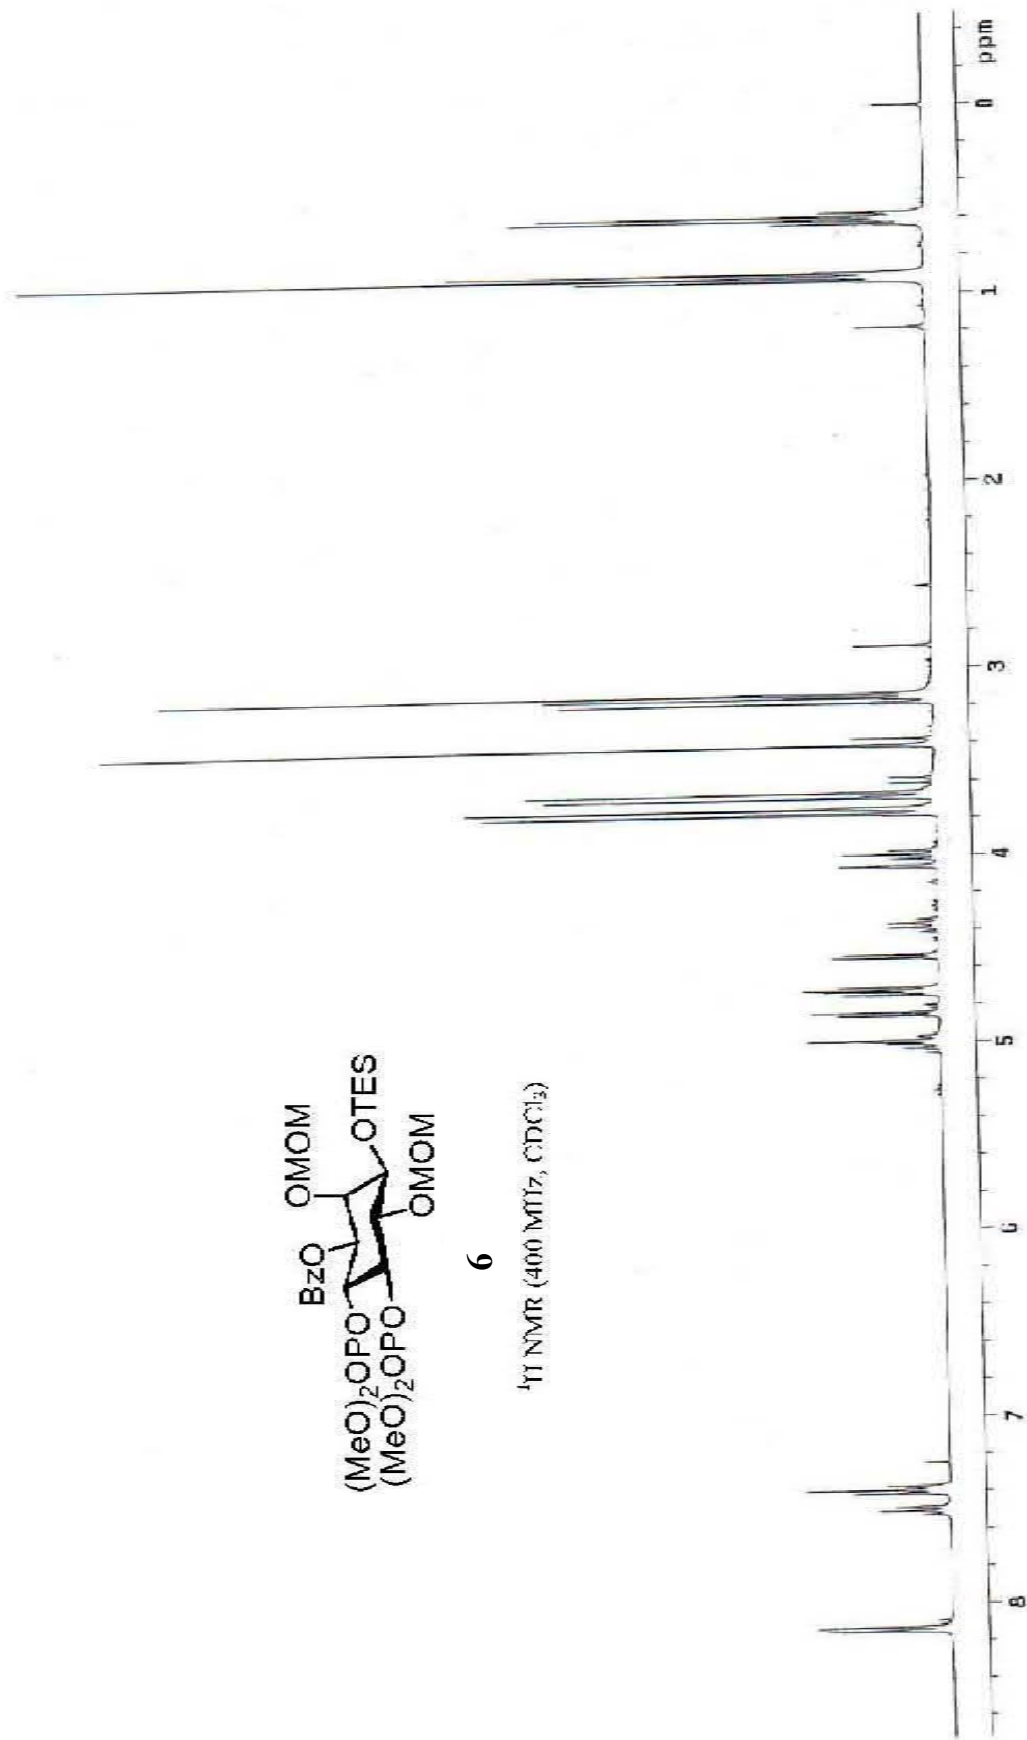



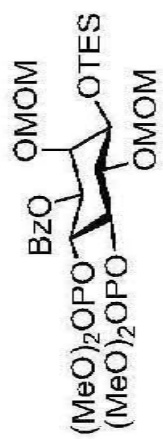

6

<sup>13</sup>CNMR(101 MHz, CDCl<sub>3</sub>)

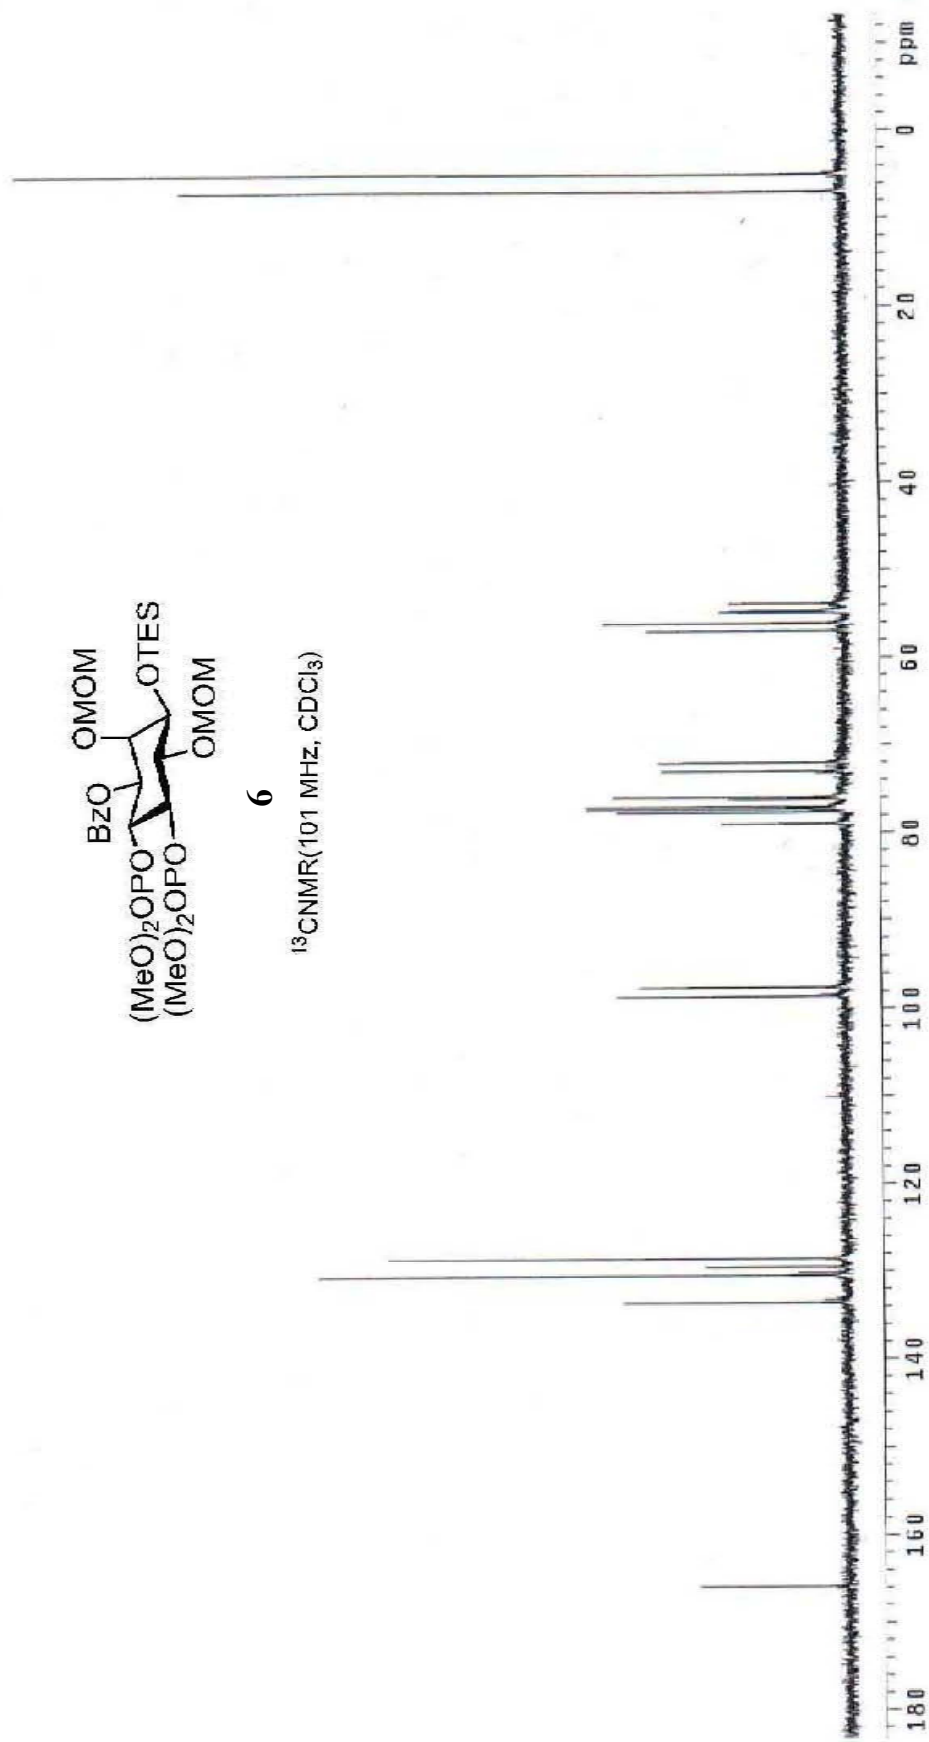



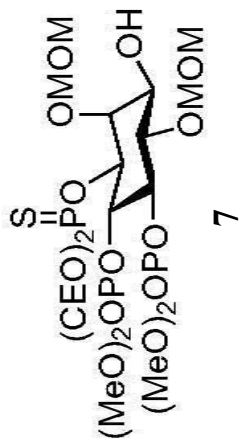

$^{31}\text{P}$ NMR (162 MHz,  $\text{CDCl}_3$ )

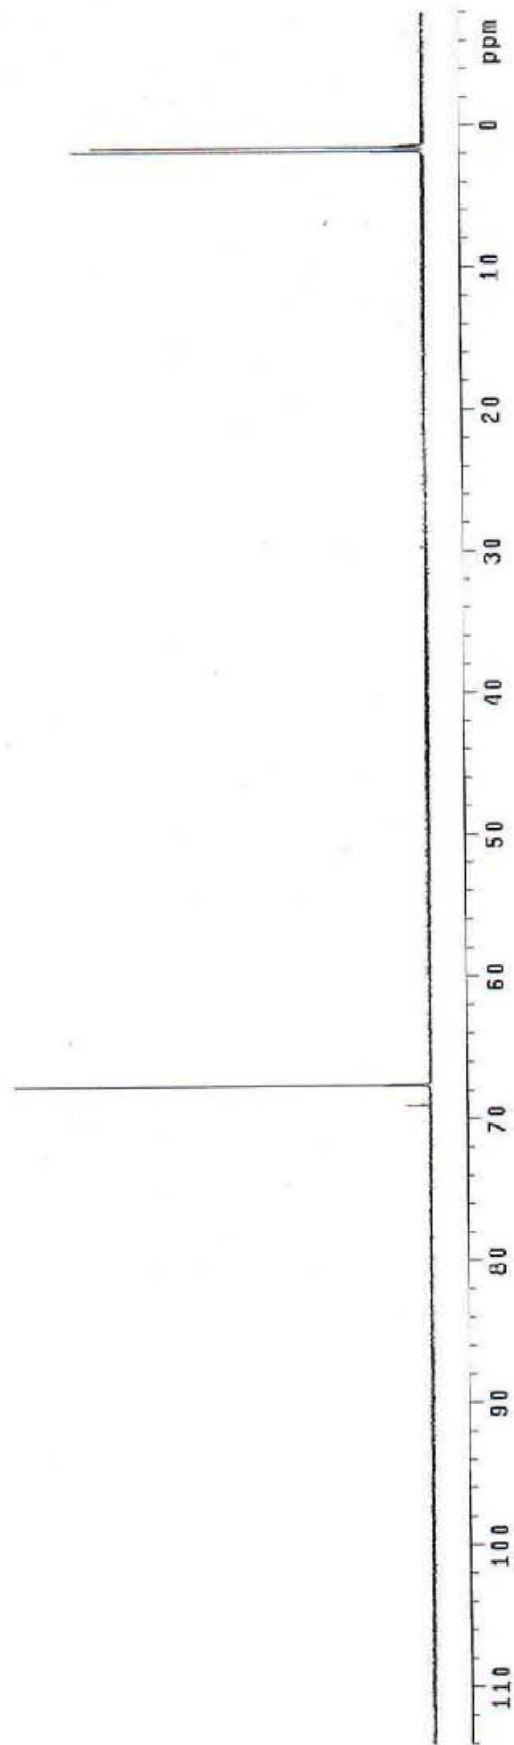

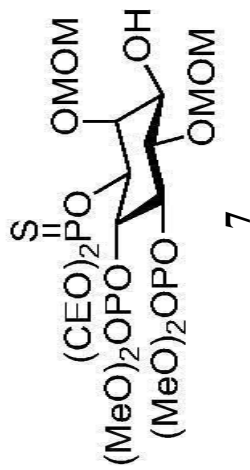

<sup>13</sup>CNMR(101 MHz, CDCl<sub>3</sub>)

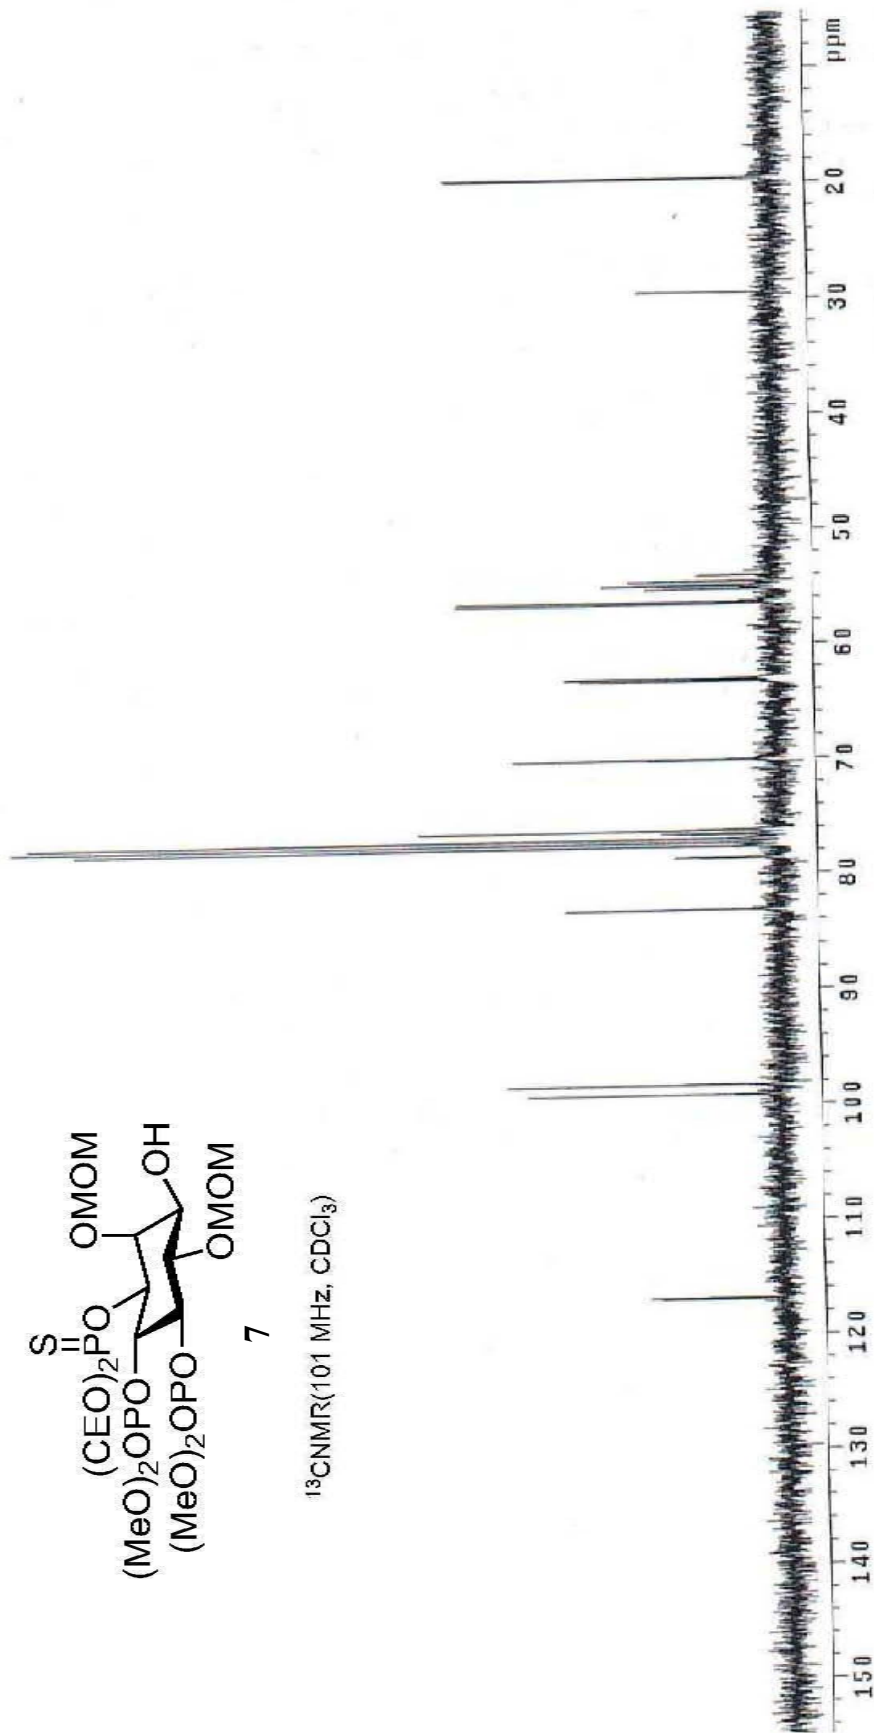

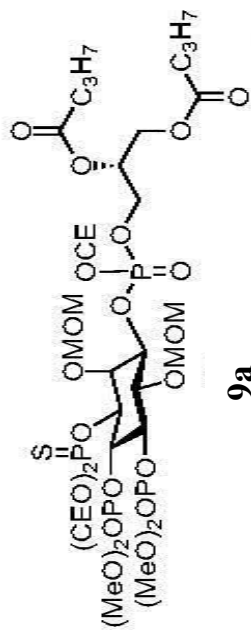

**9a**

<sup>1</sup>H NMR (400 MHz, CDCl<sub>3</sub>)

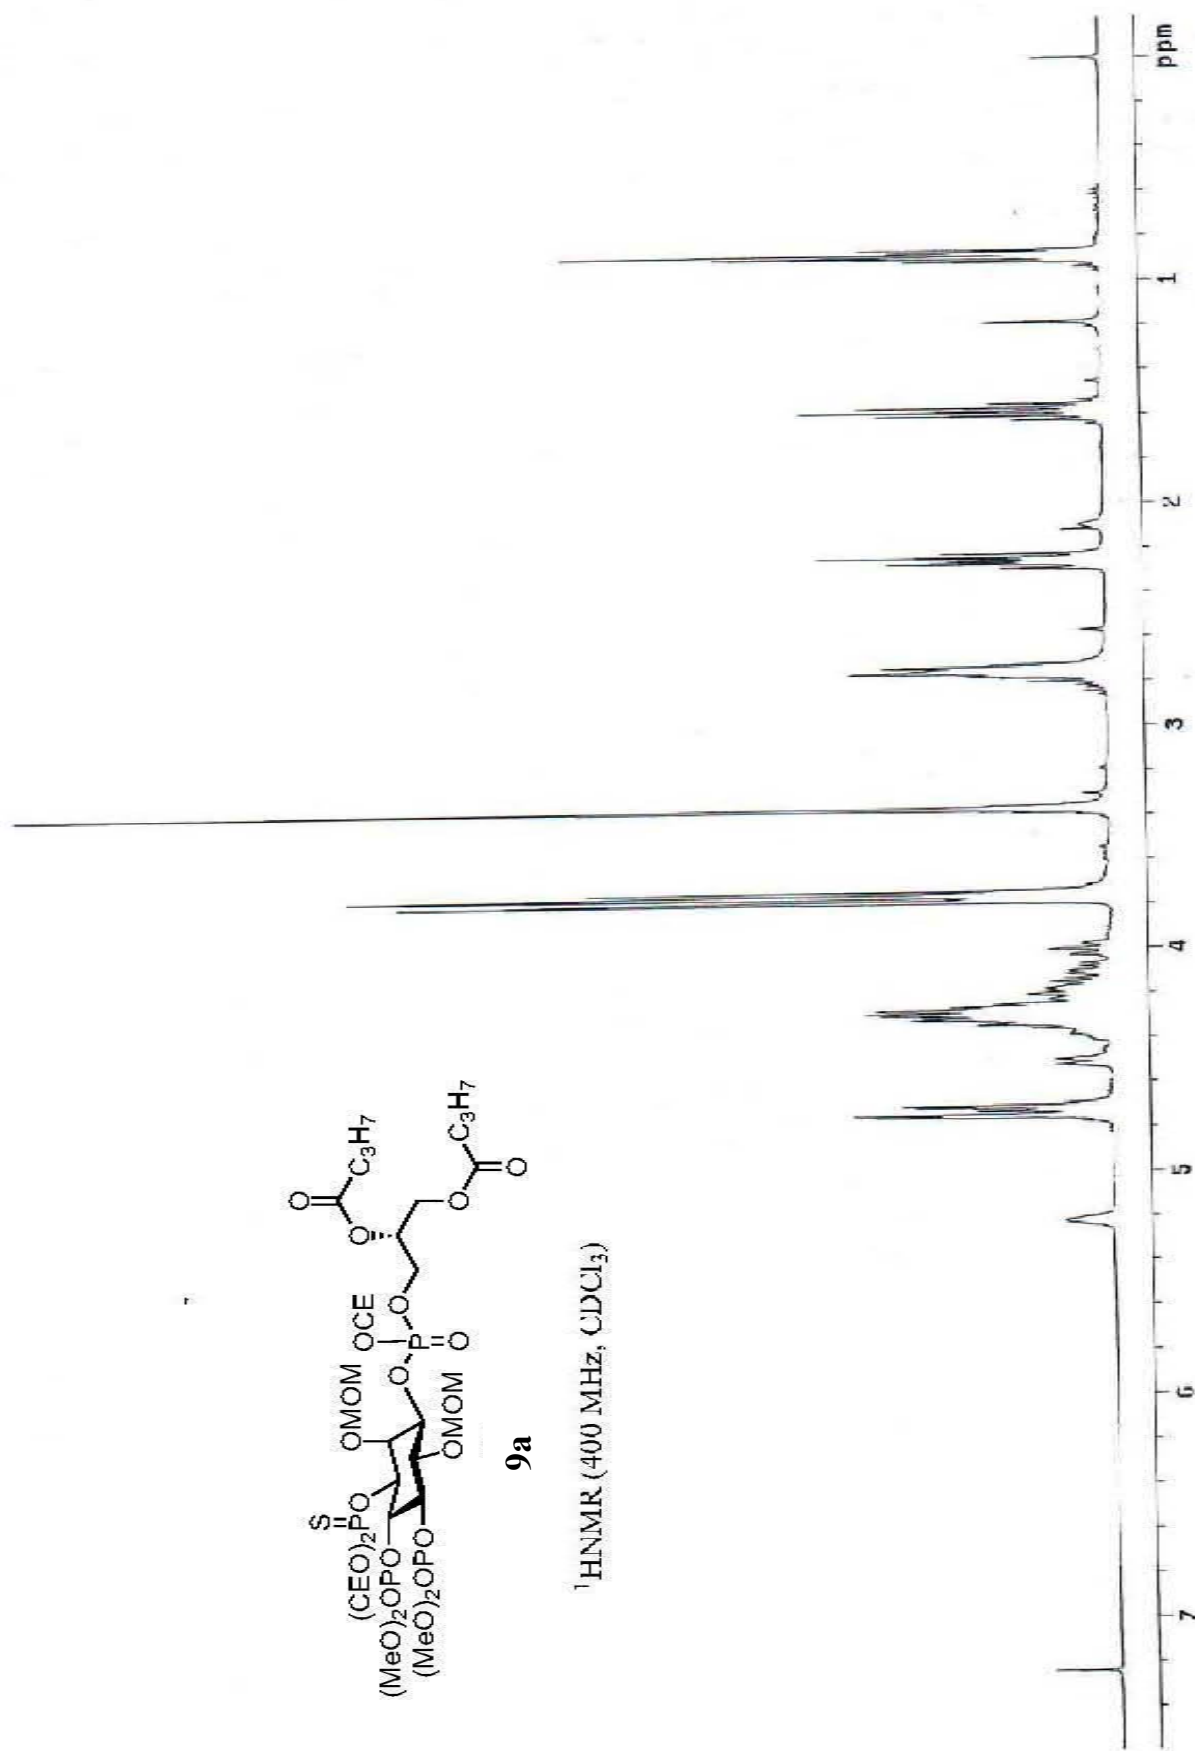



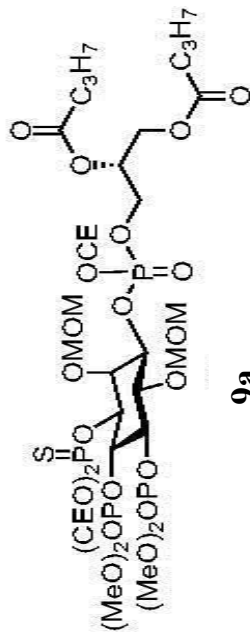

**9a**

$^{31}\text{P}$ NMR (162 MHz,  $\text{CDCl}_3$ )

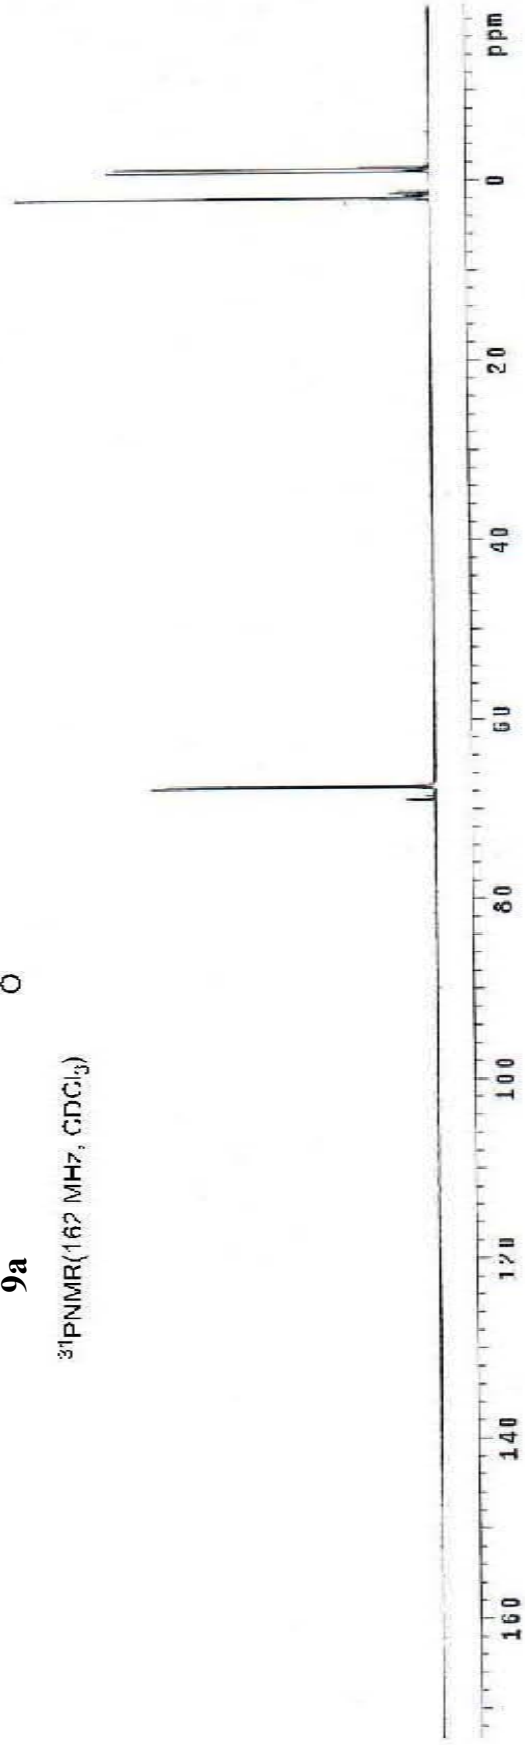

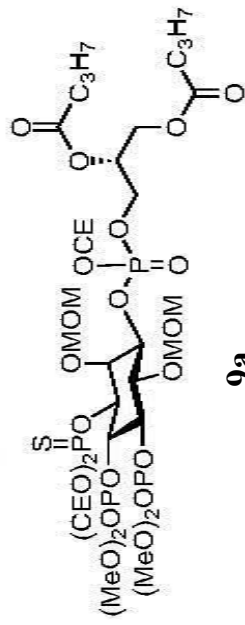

**9a**

$^{13}\text{C}$ NMR (101 MHz,  $\text{CDCl}_3$ )

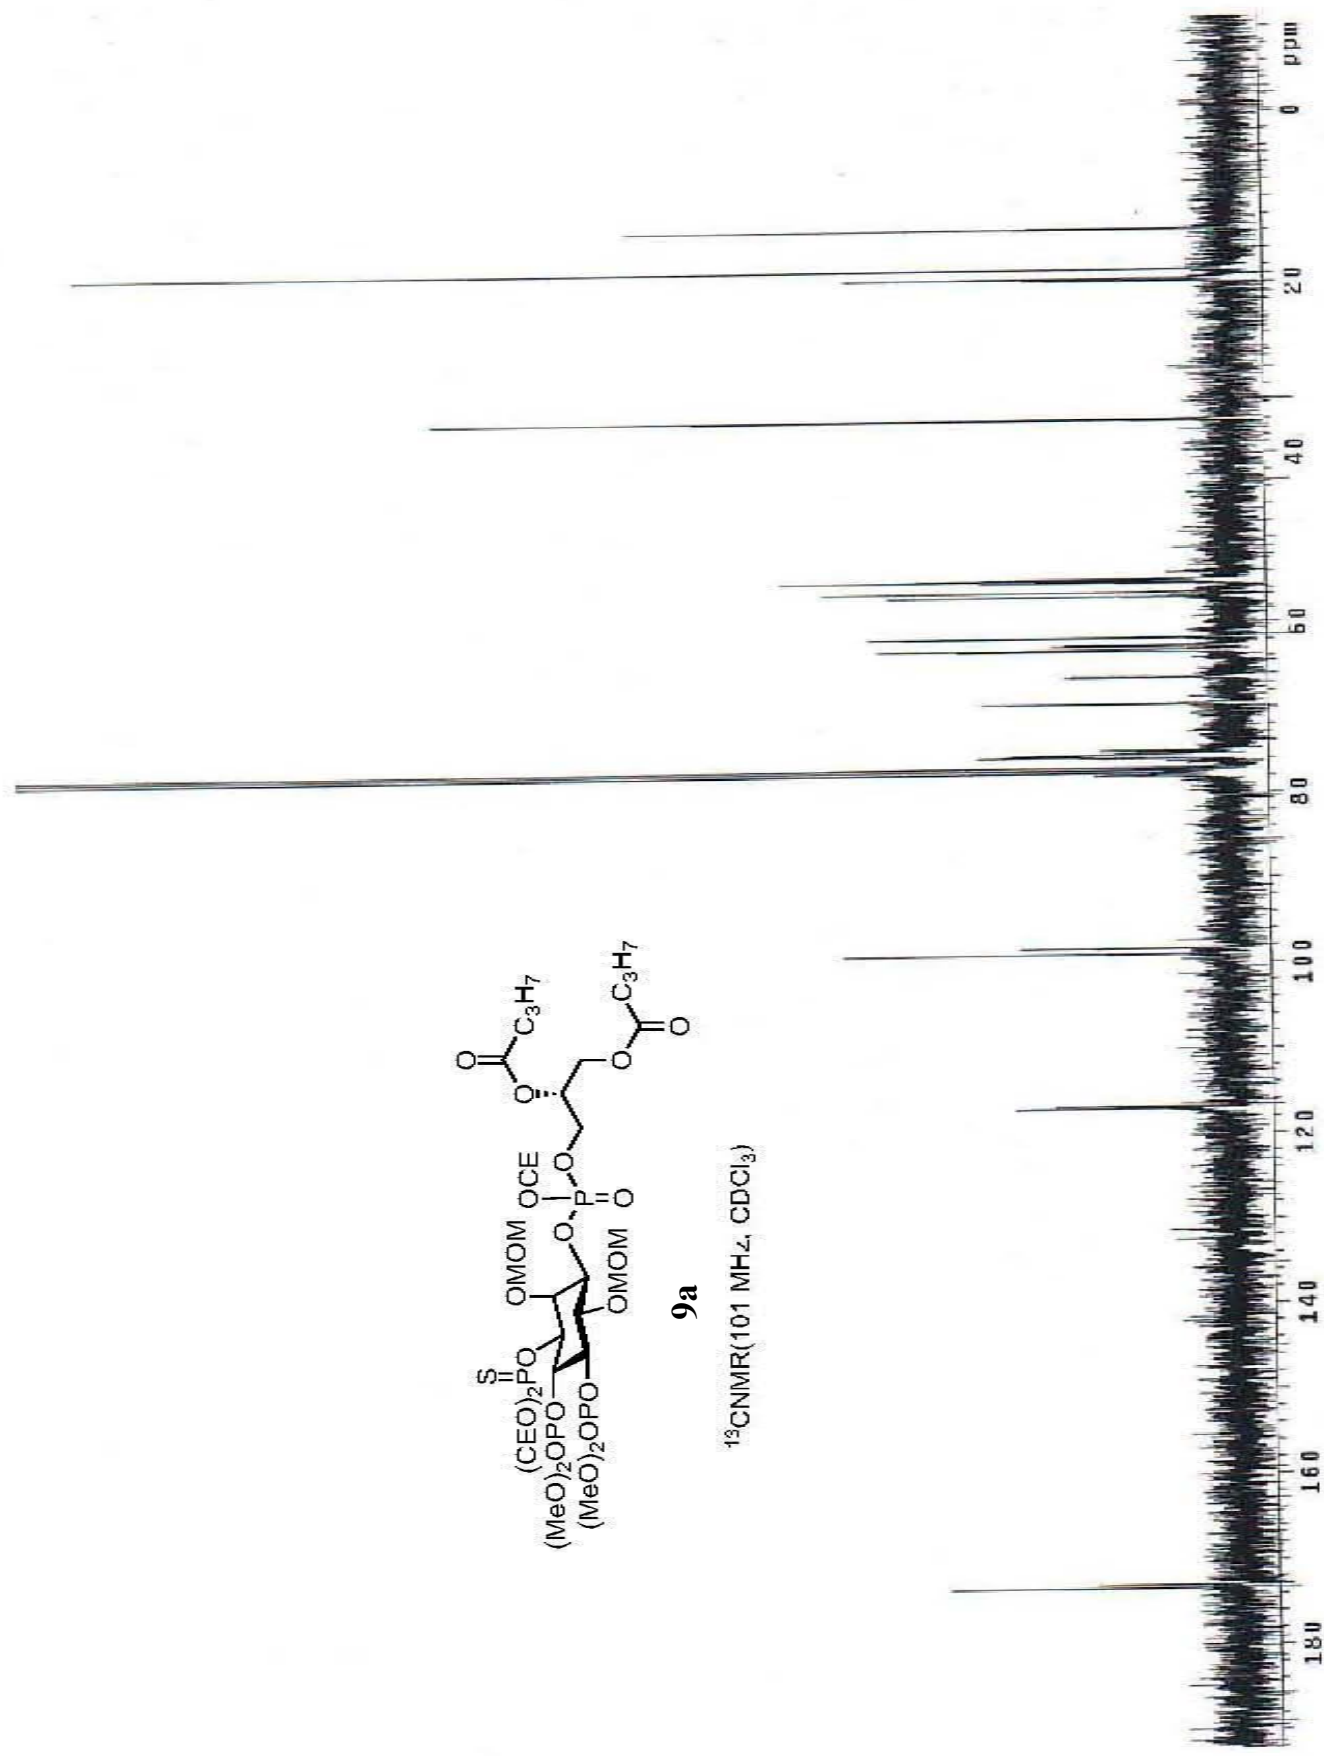



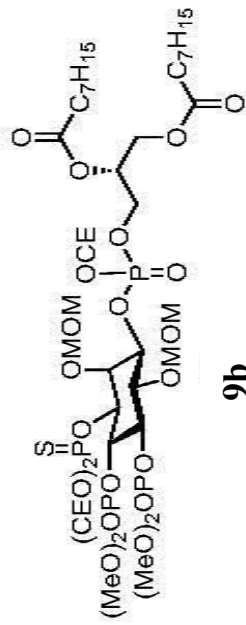

**9b**

$^{31}\text{P}$ NMR (162 MHz,  $\text{CDCl}_3$ )

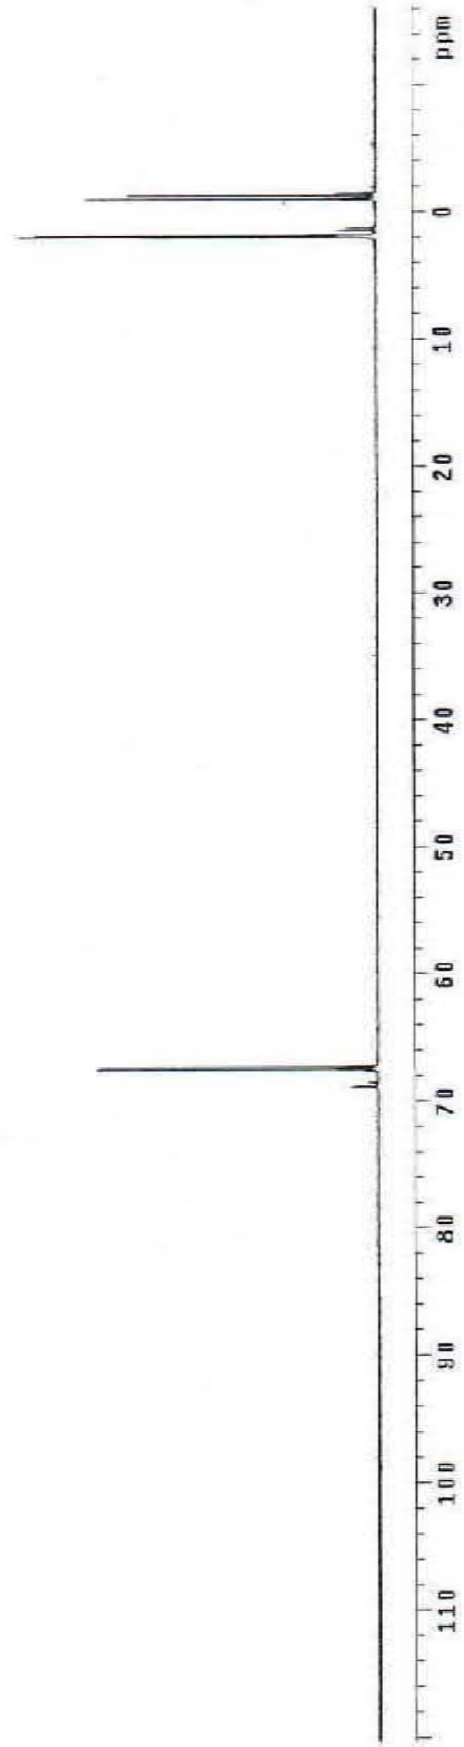

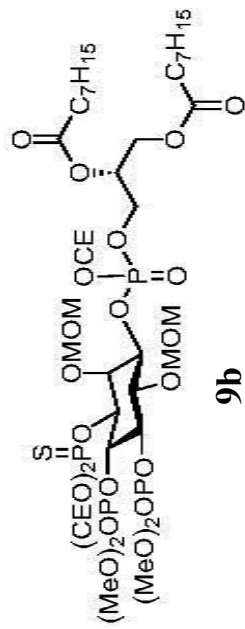

**9b**

<sup>13</sup>CNMR (101 MHz, CDCl<sub>3</sub>)

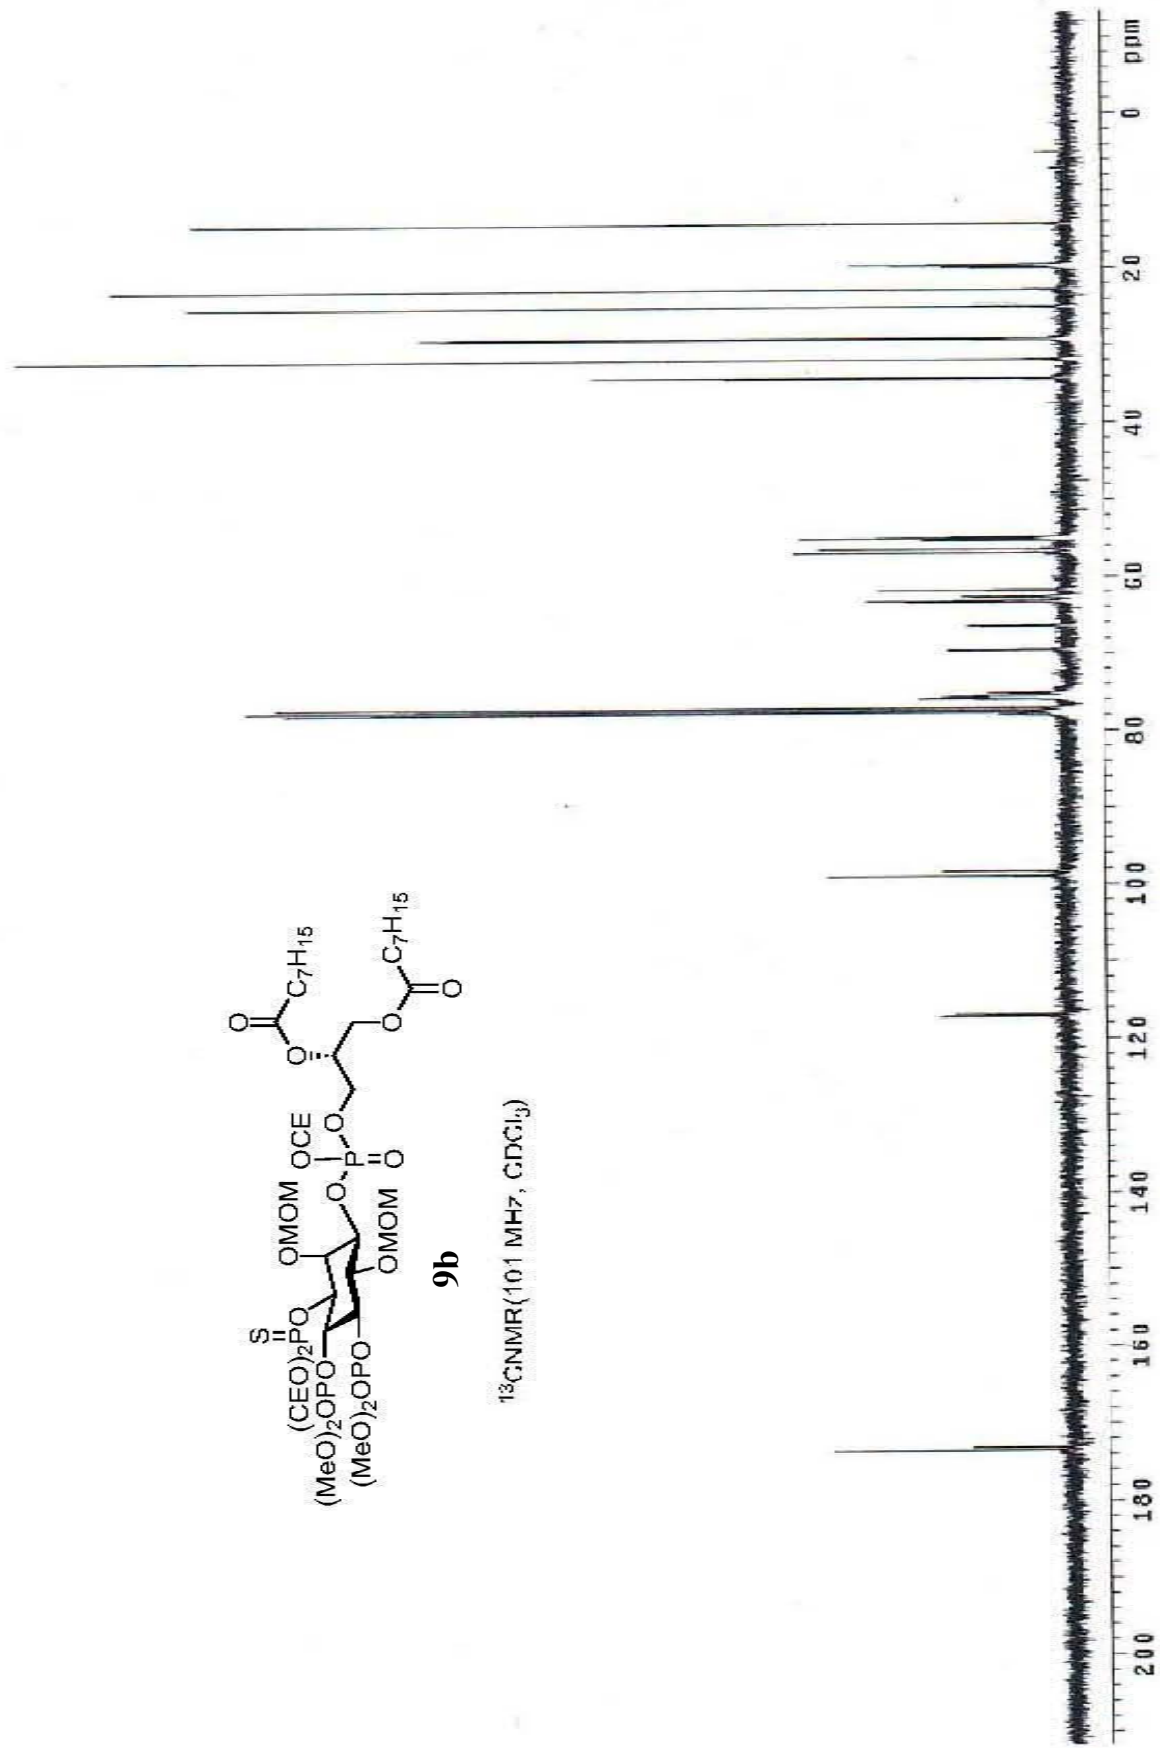

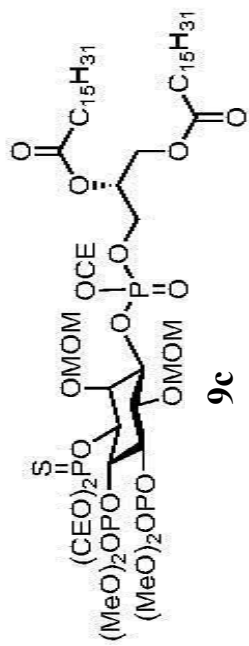

**9c**

<sup>31</sup>P NMR (400 MHz, CDCl<sub>3</sub>)

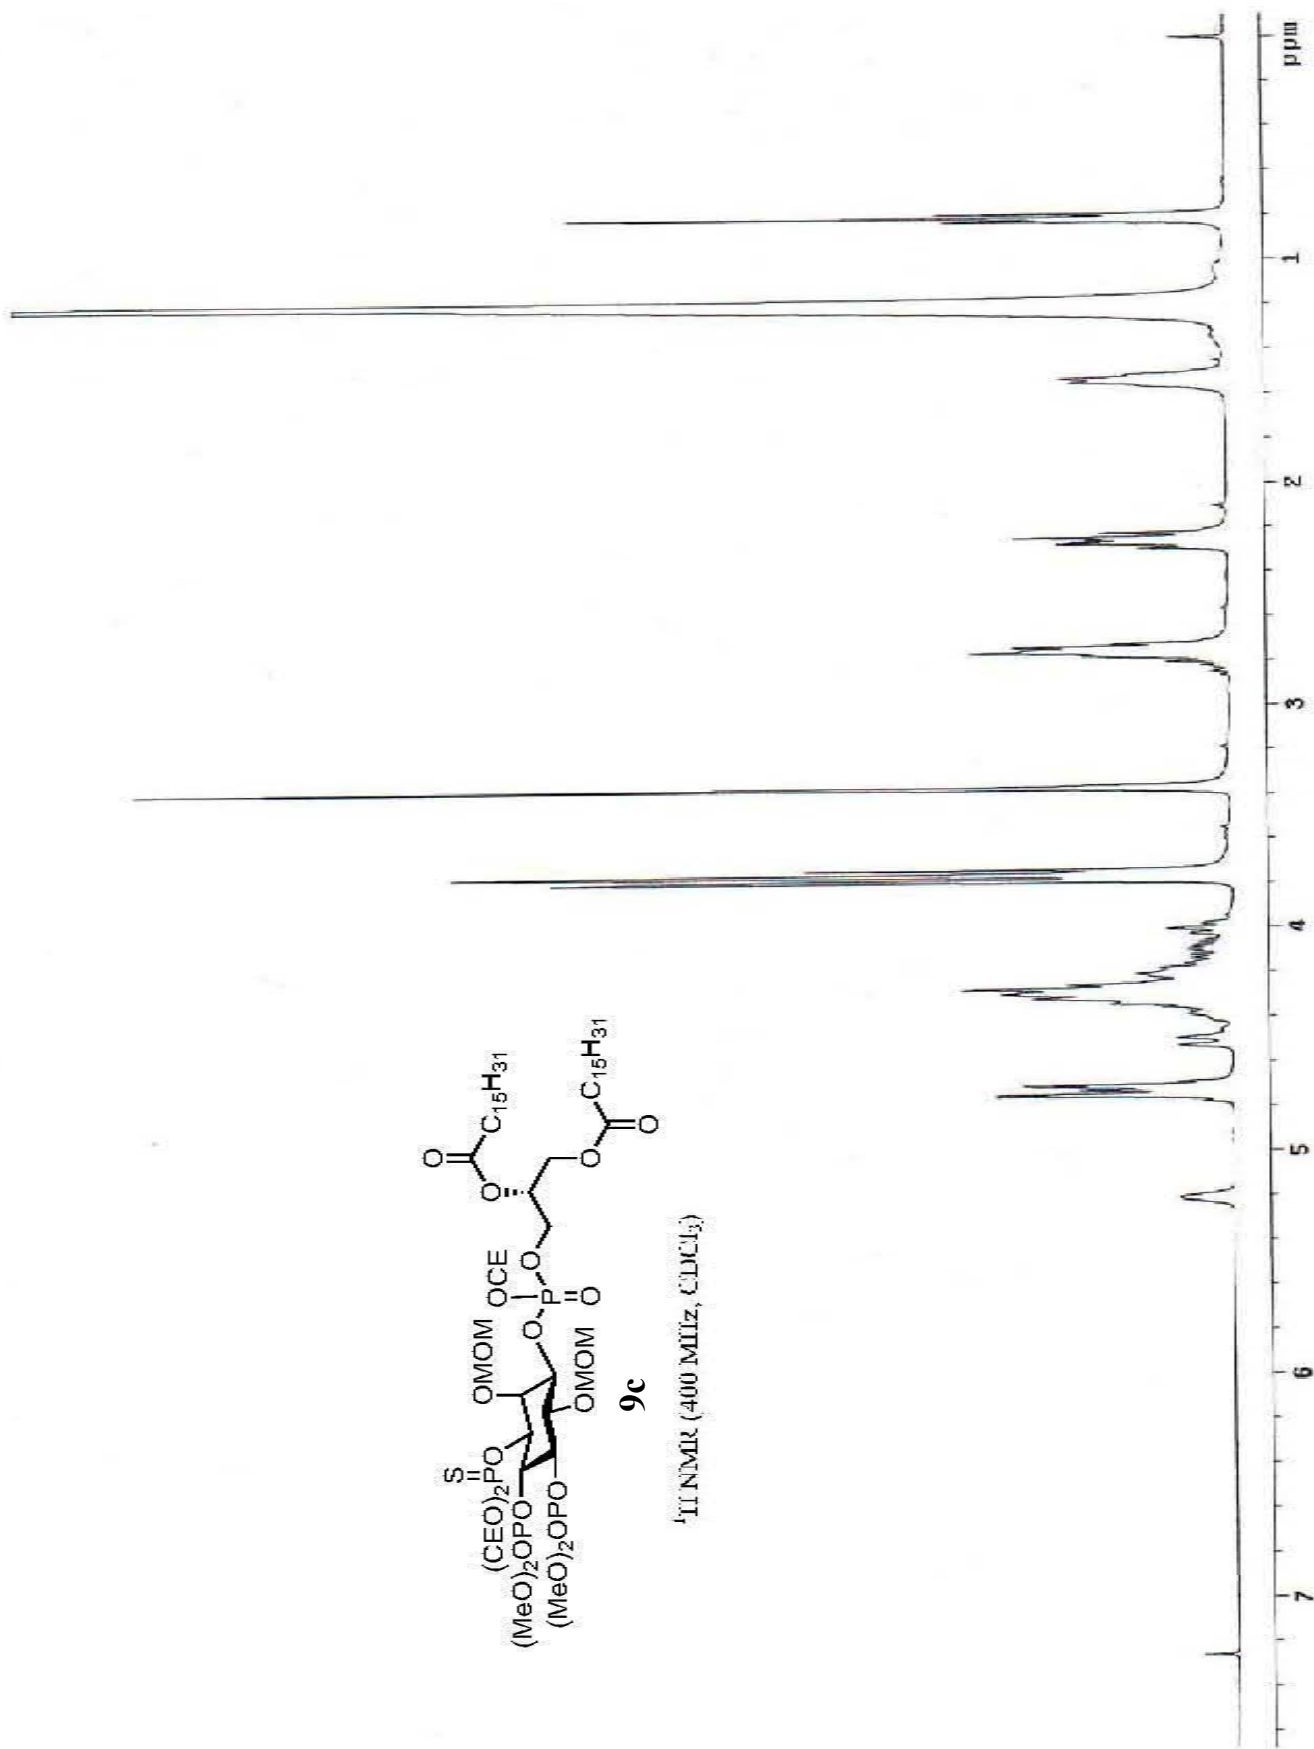

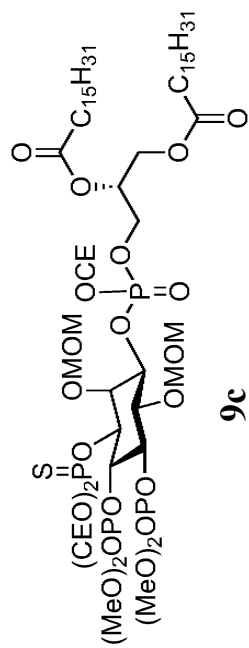

**9c**

<sup>31</sup>P NMR (162 MHz, CDCl<sub>3</sub>)

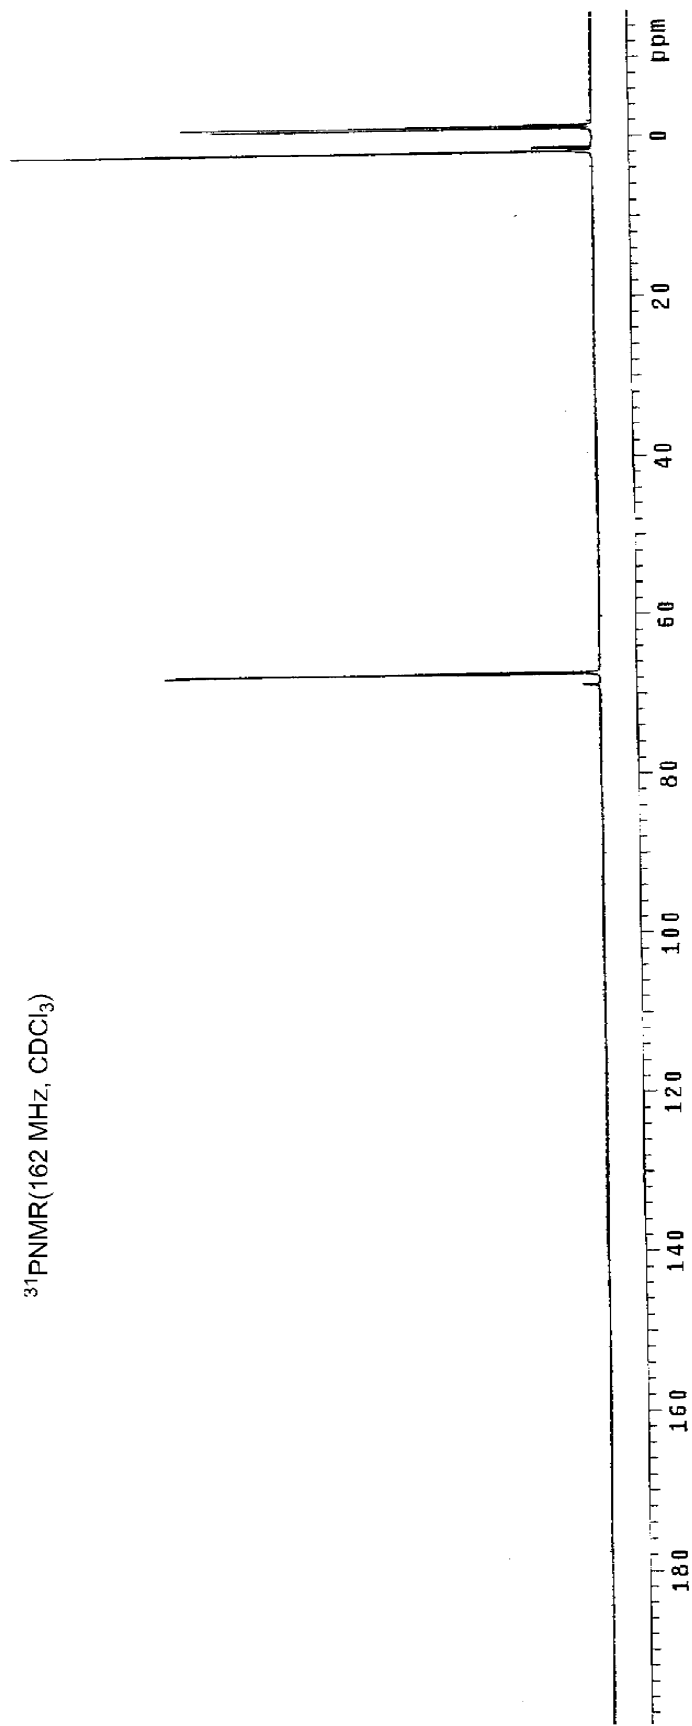

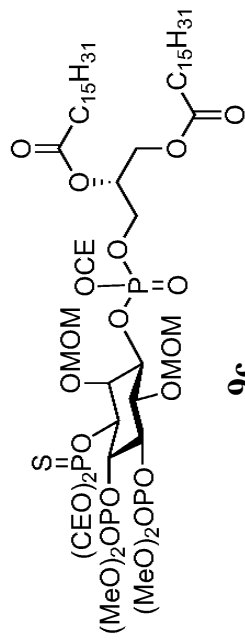

**9c**

<sup>13</sup>CNMR(101 MHz, CDCl<sub>3</sub>)

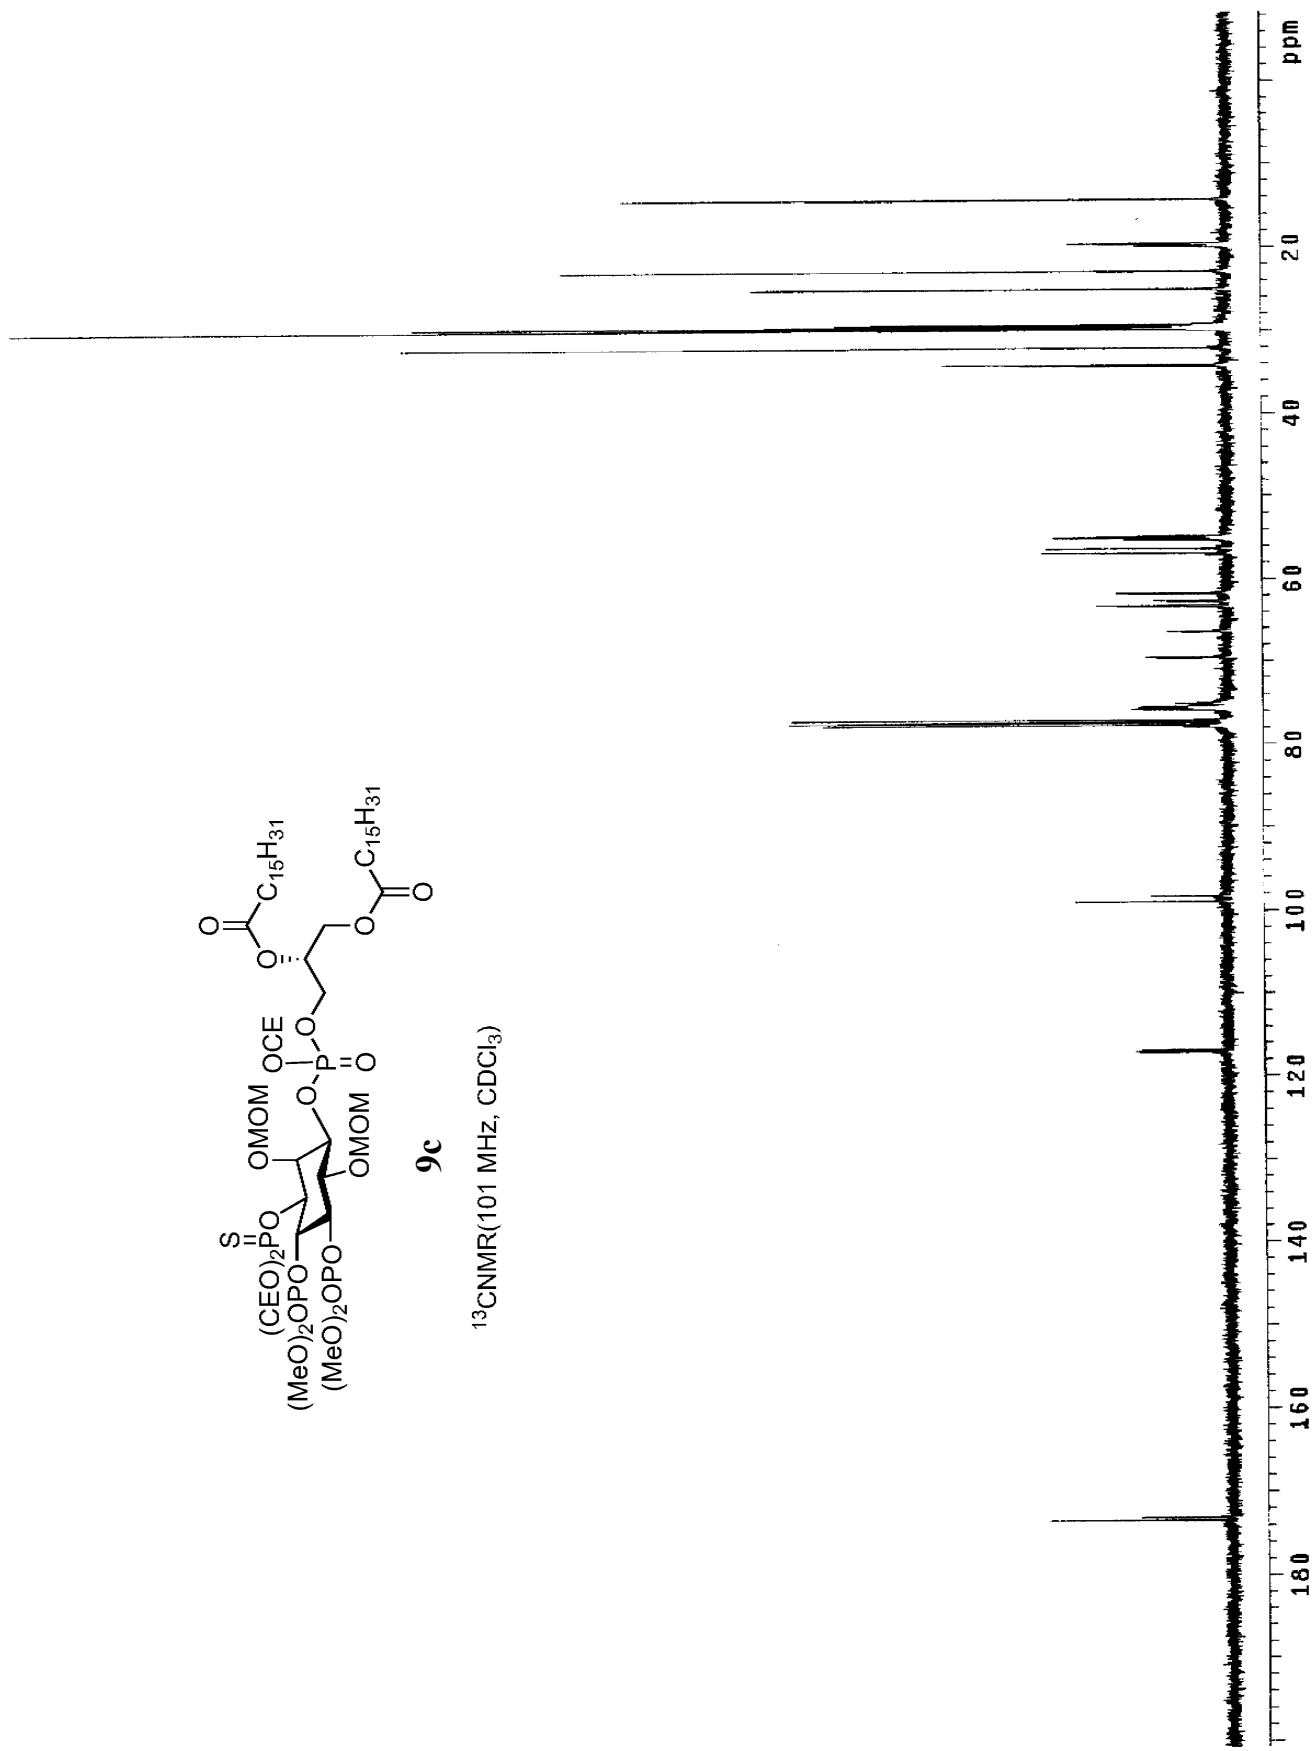



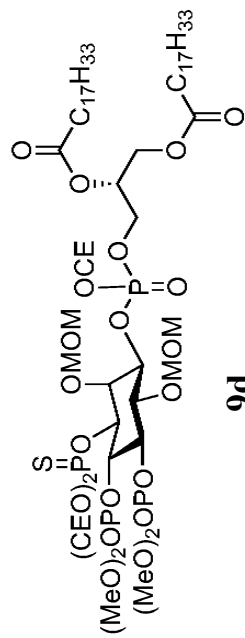

**9d**

$^1\text{H}$ NMR (400 MHz,  $\text{CDCl}_3$ )

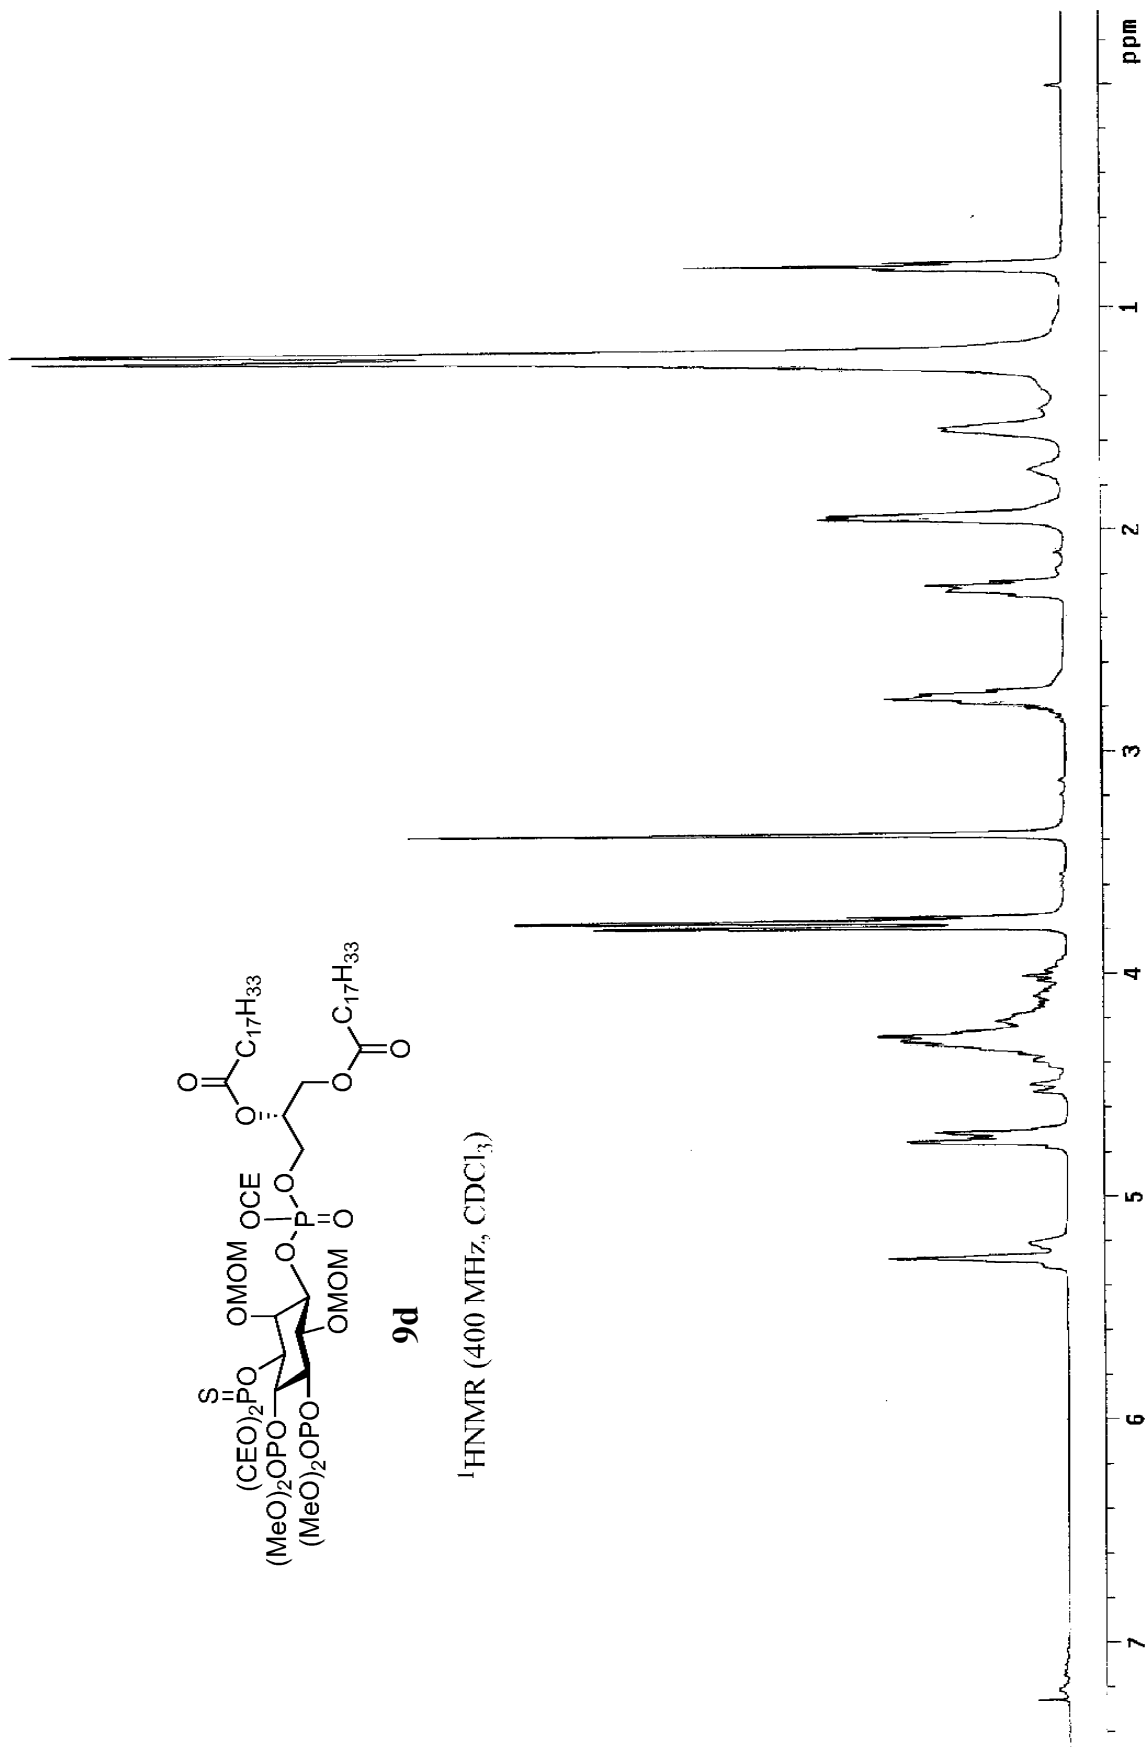

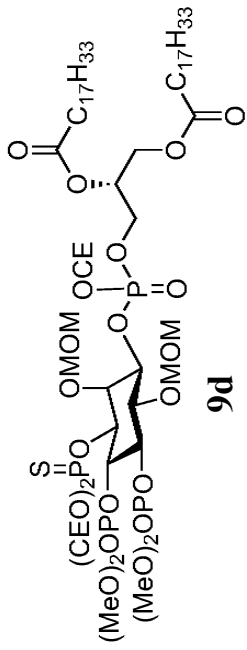

**9d**

<sup>31</sup>P NMR (162 MHz, CDCl<sub>3</sub>)

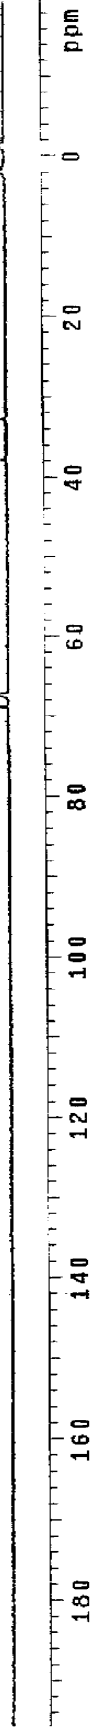

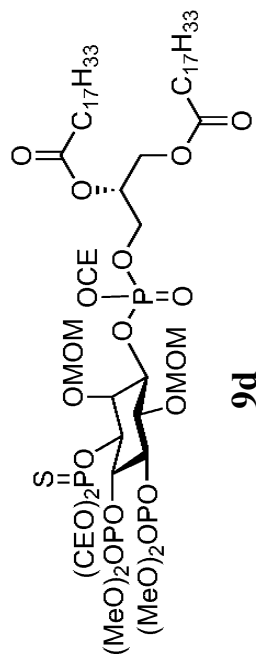

**9d**

<sup>13</sup>CNMR (101 MHz, CDCl<sub>3</sub>)

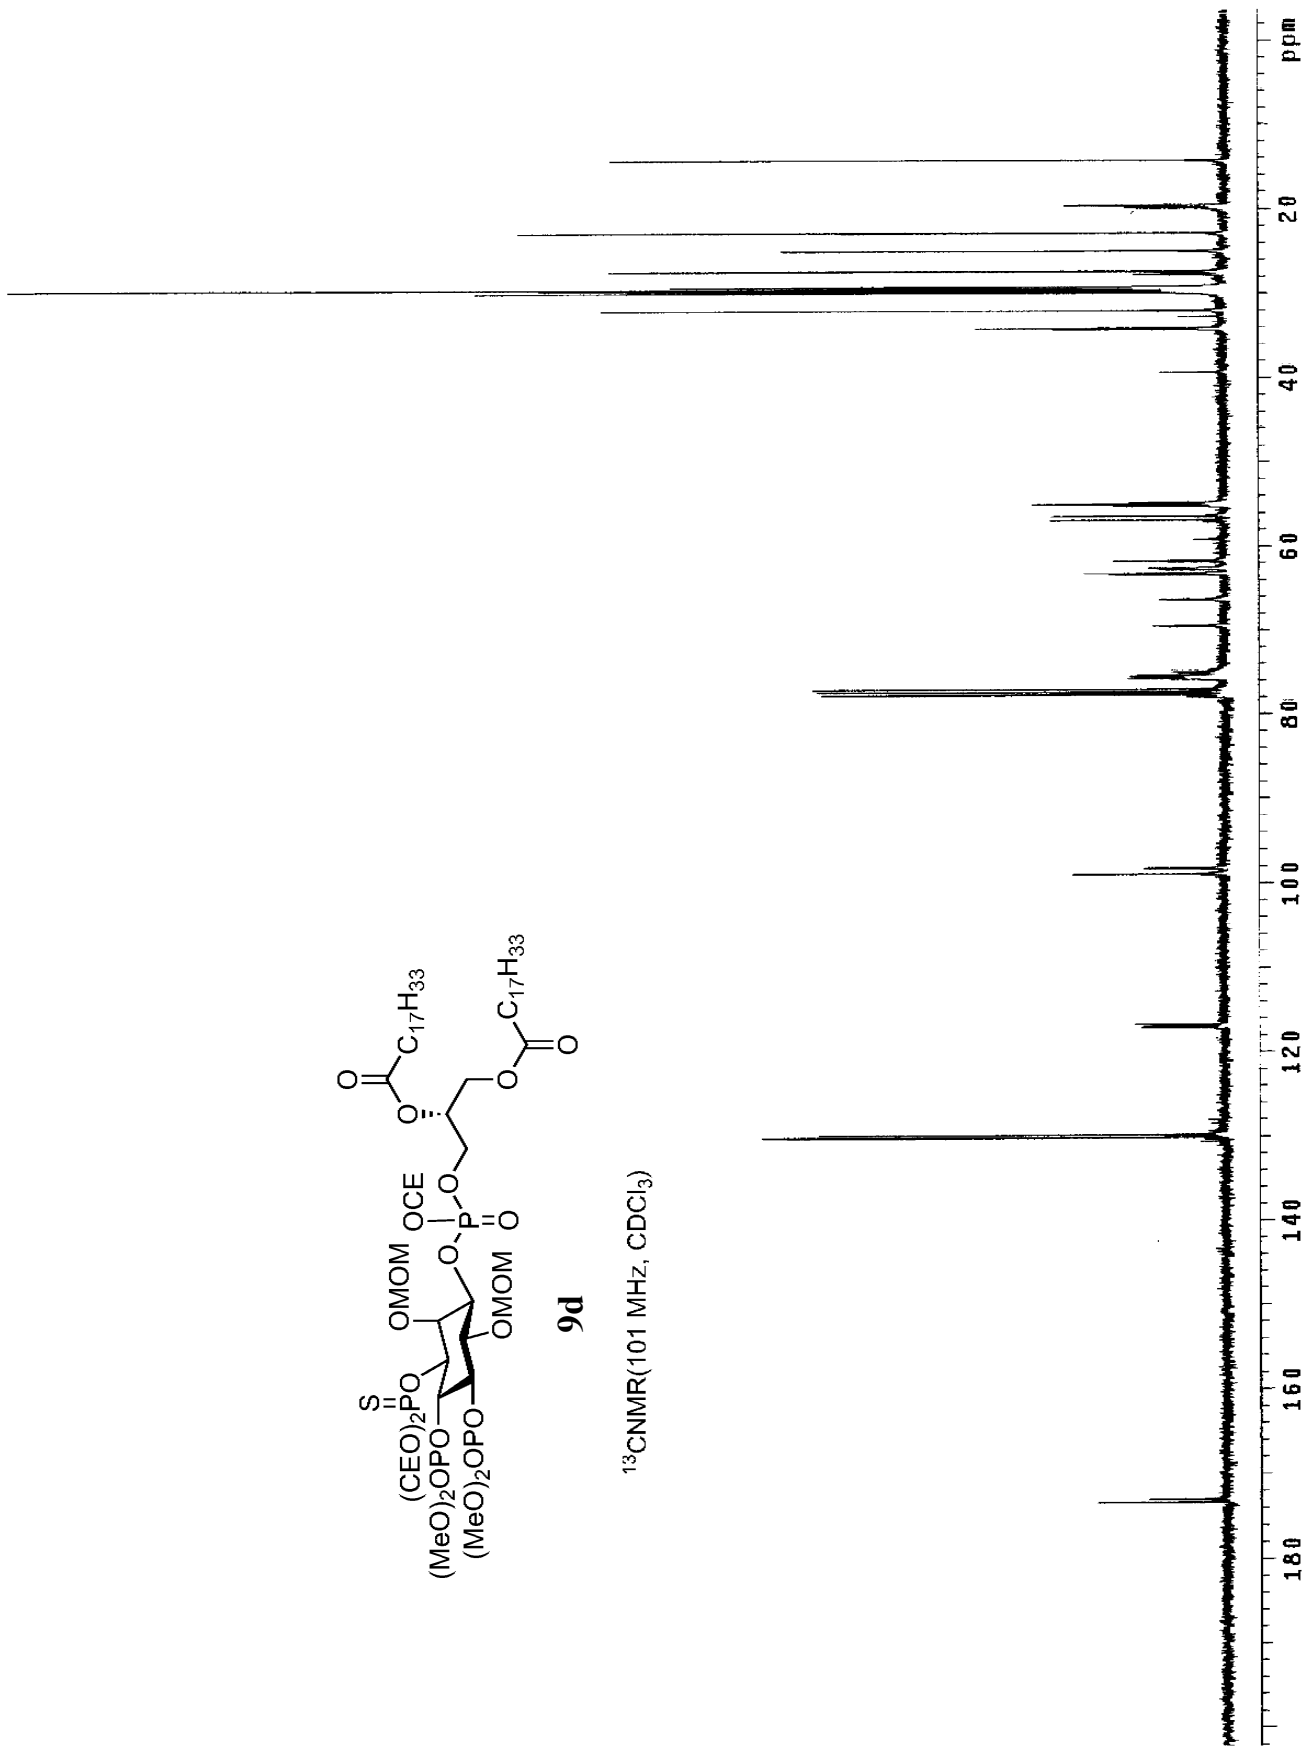

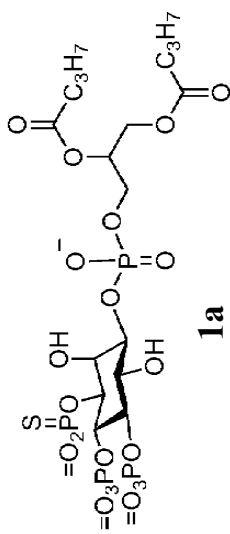

<sup>1</sup>H NMR (400 MHz, CD<sub>3</sub>OD)

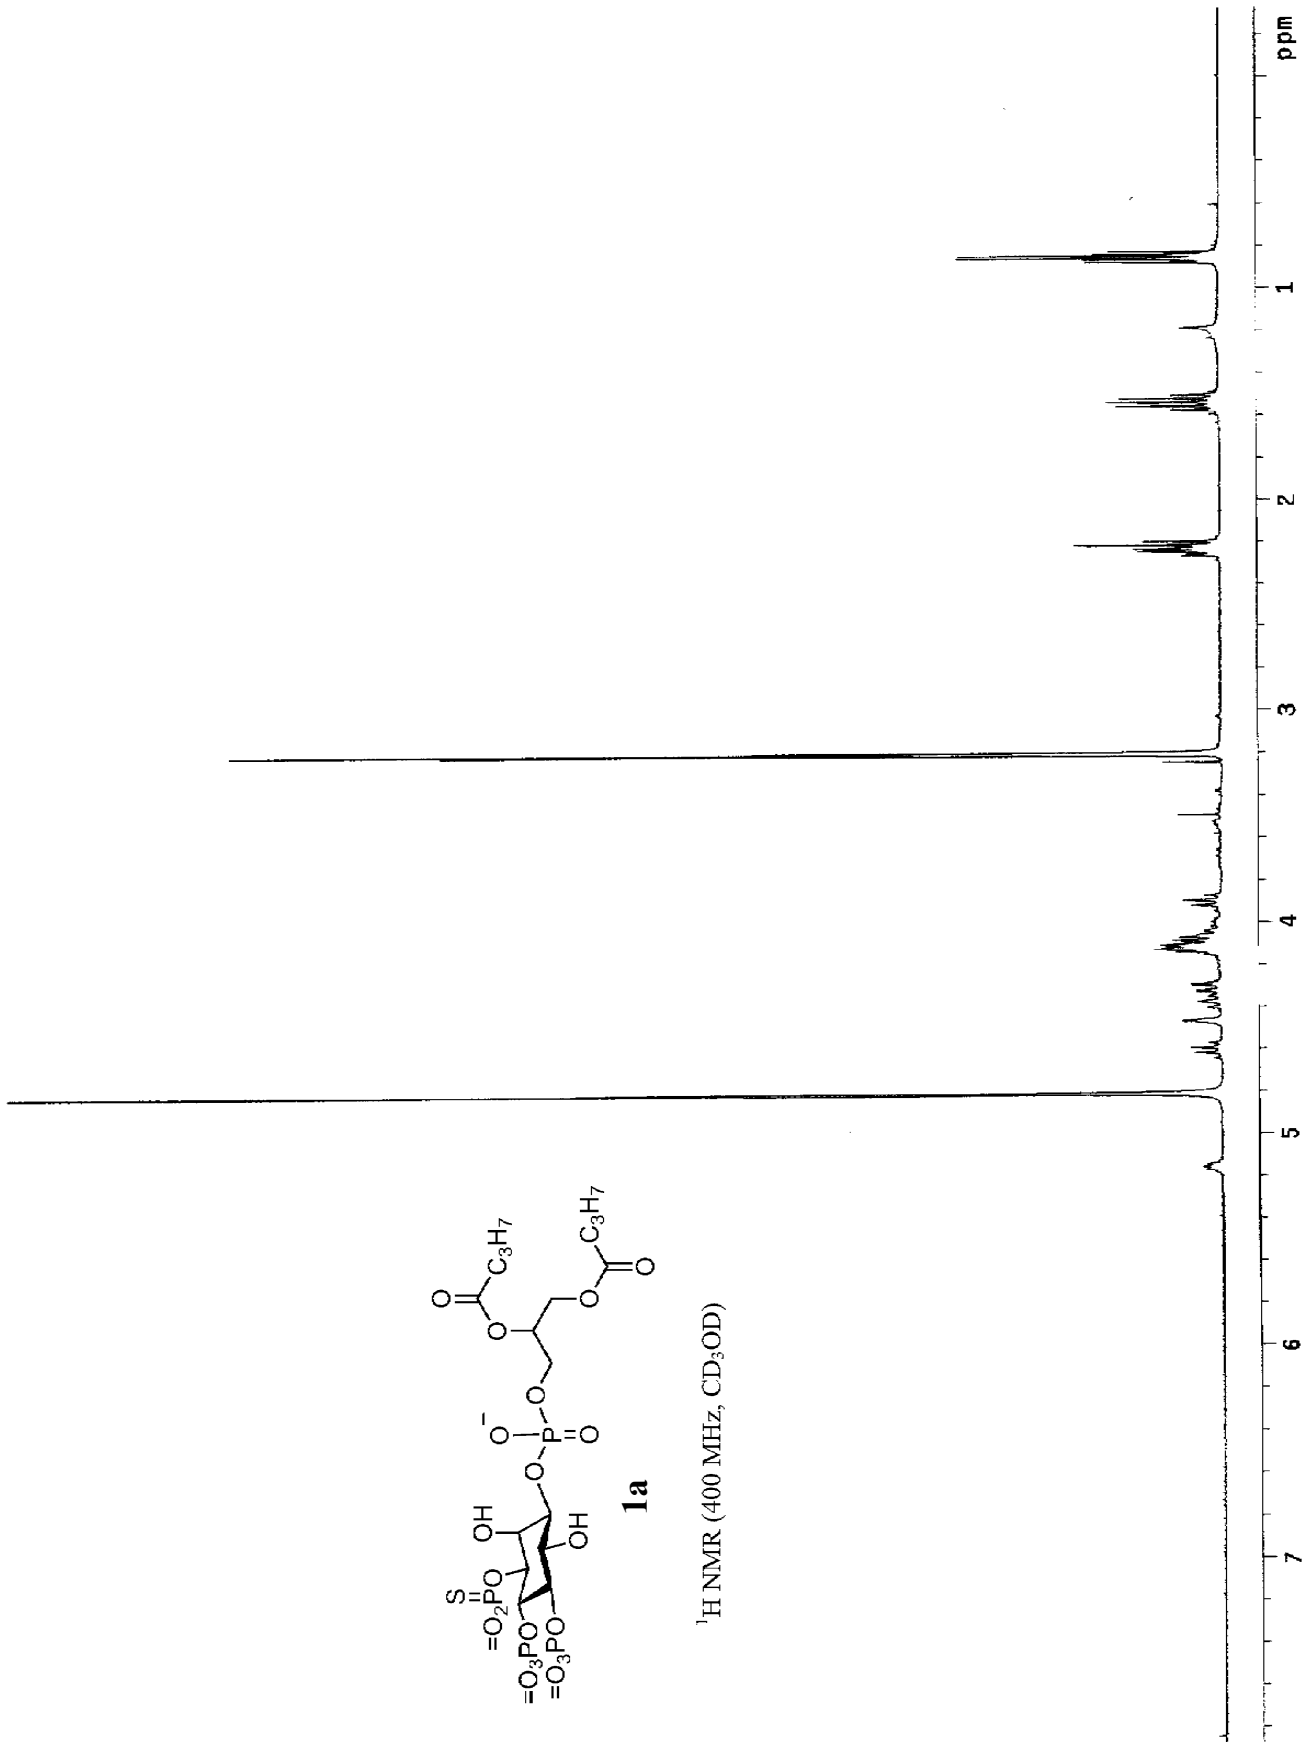

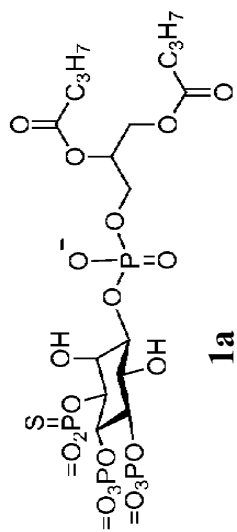

$^{31}\text{P}$  NMR (162 MHz,  $\text{CD}_3\text{OD}$ )

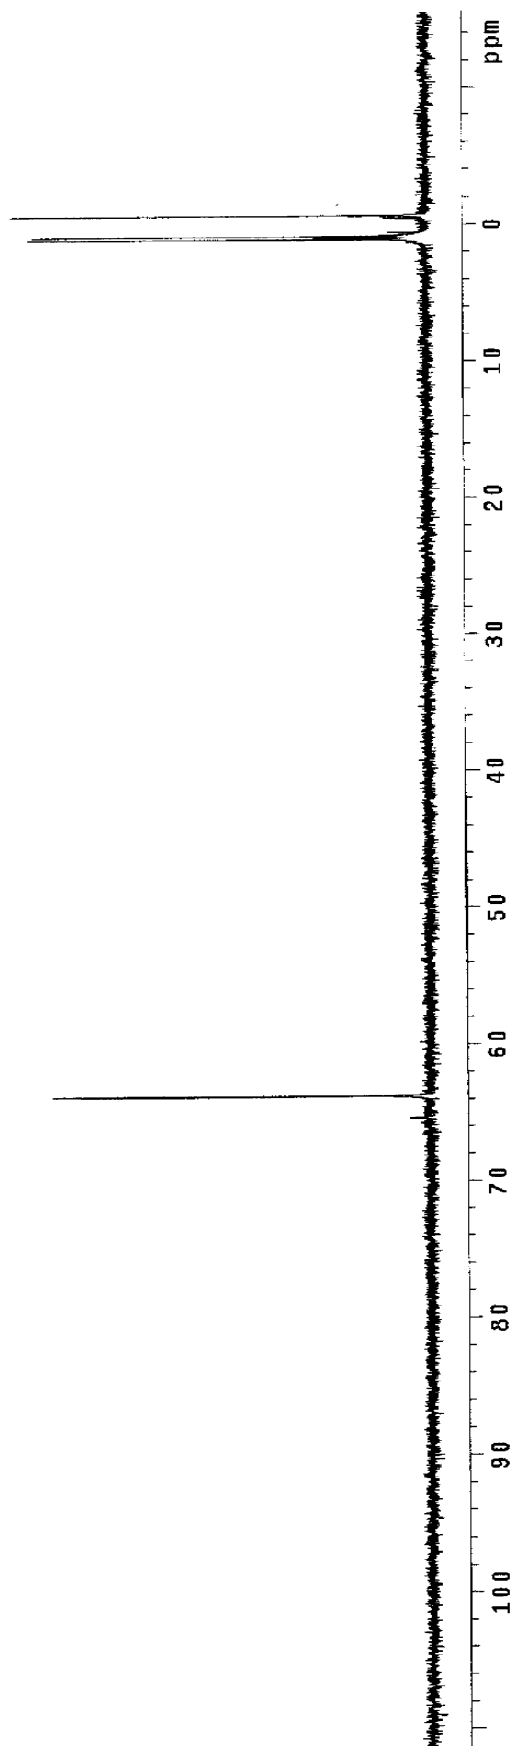

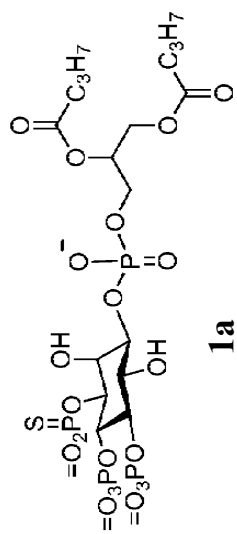

$^{13}\text{C}$  NMR (400 MHz,  $\text{CD}_3\text{OD}$ )

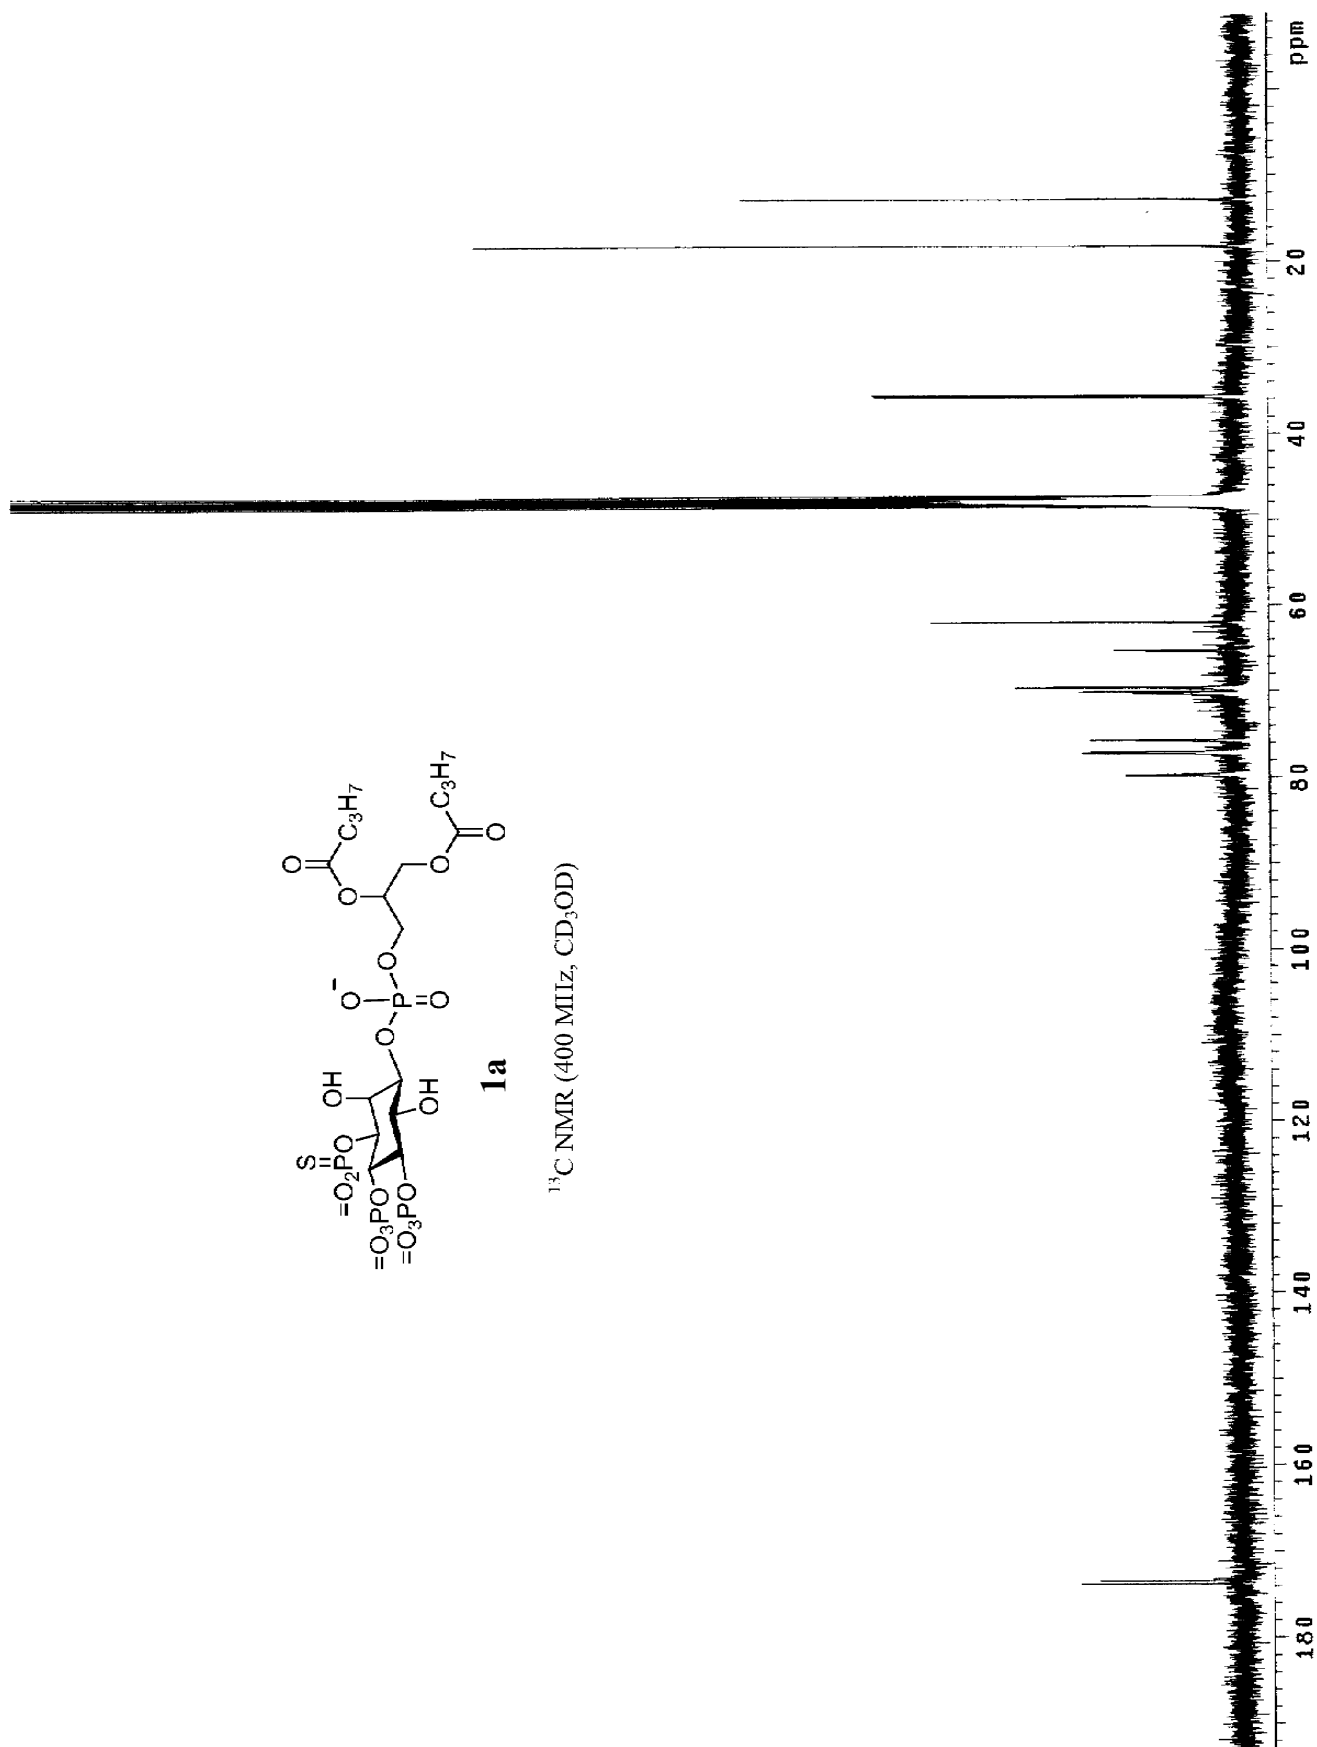



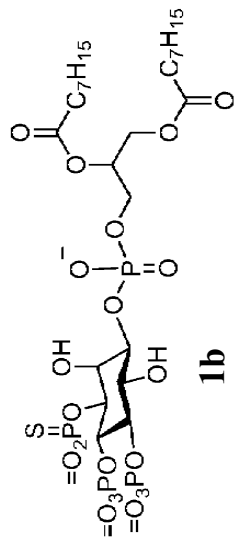

$^{31}\text{P}$  NMR (162 MHz,  $\text{CD}_3\text{OD}$ )

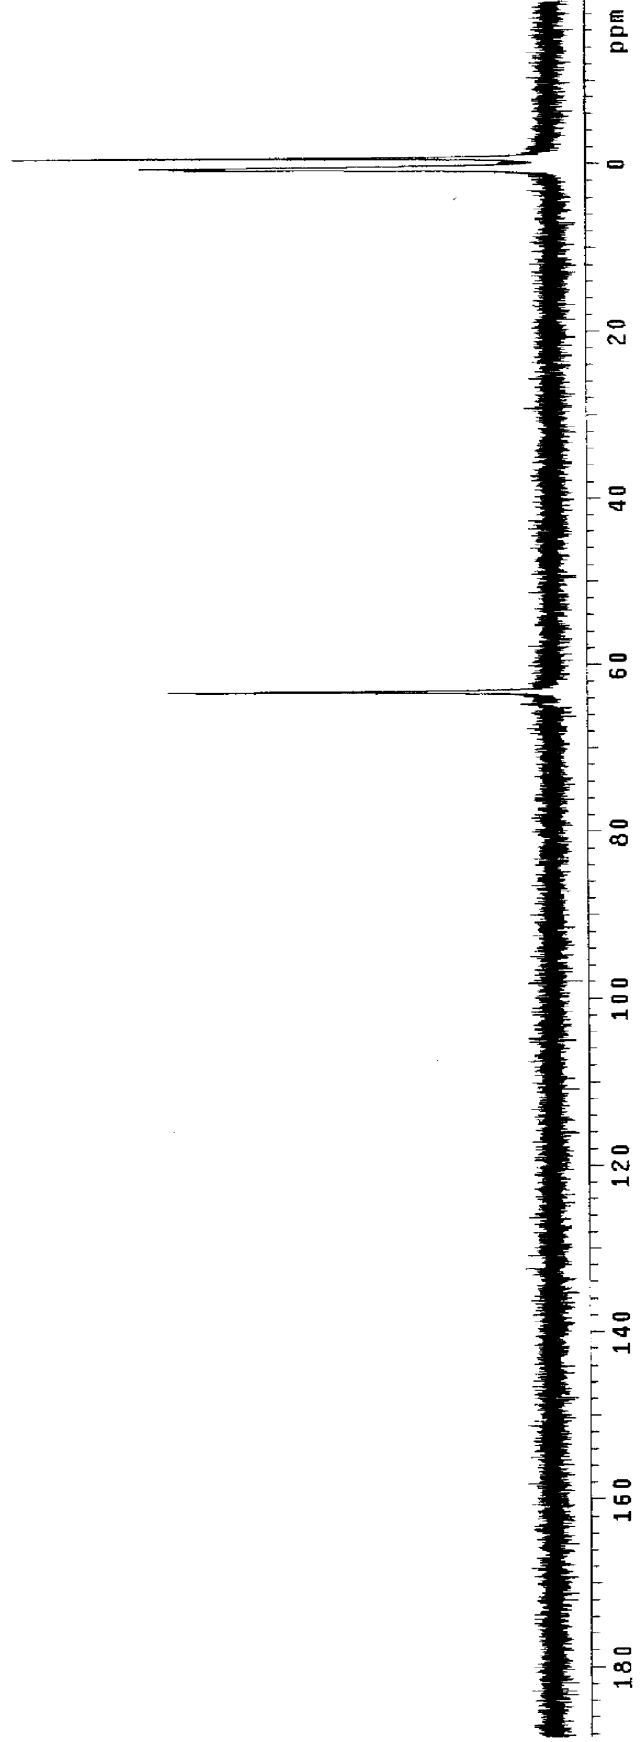



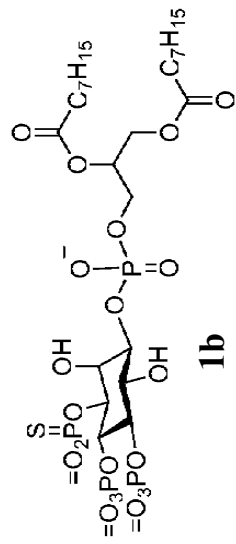

<sup>13</sup>C NMR (101MHz, CD<sub>3</sub>OD)

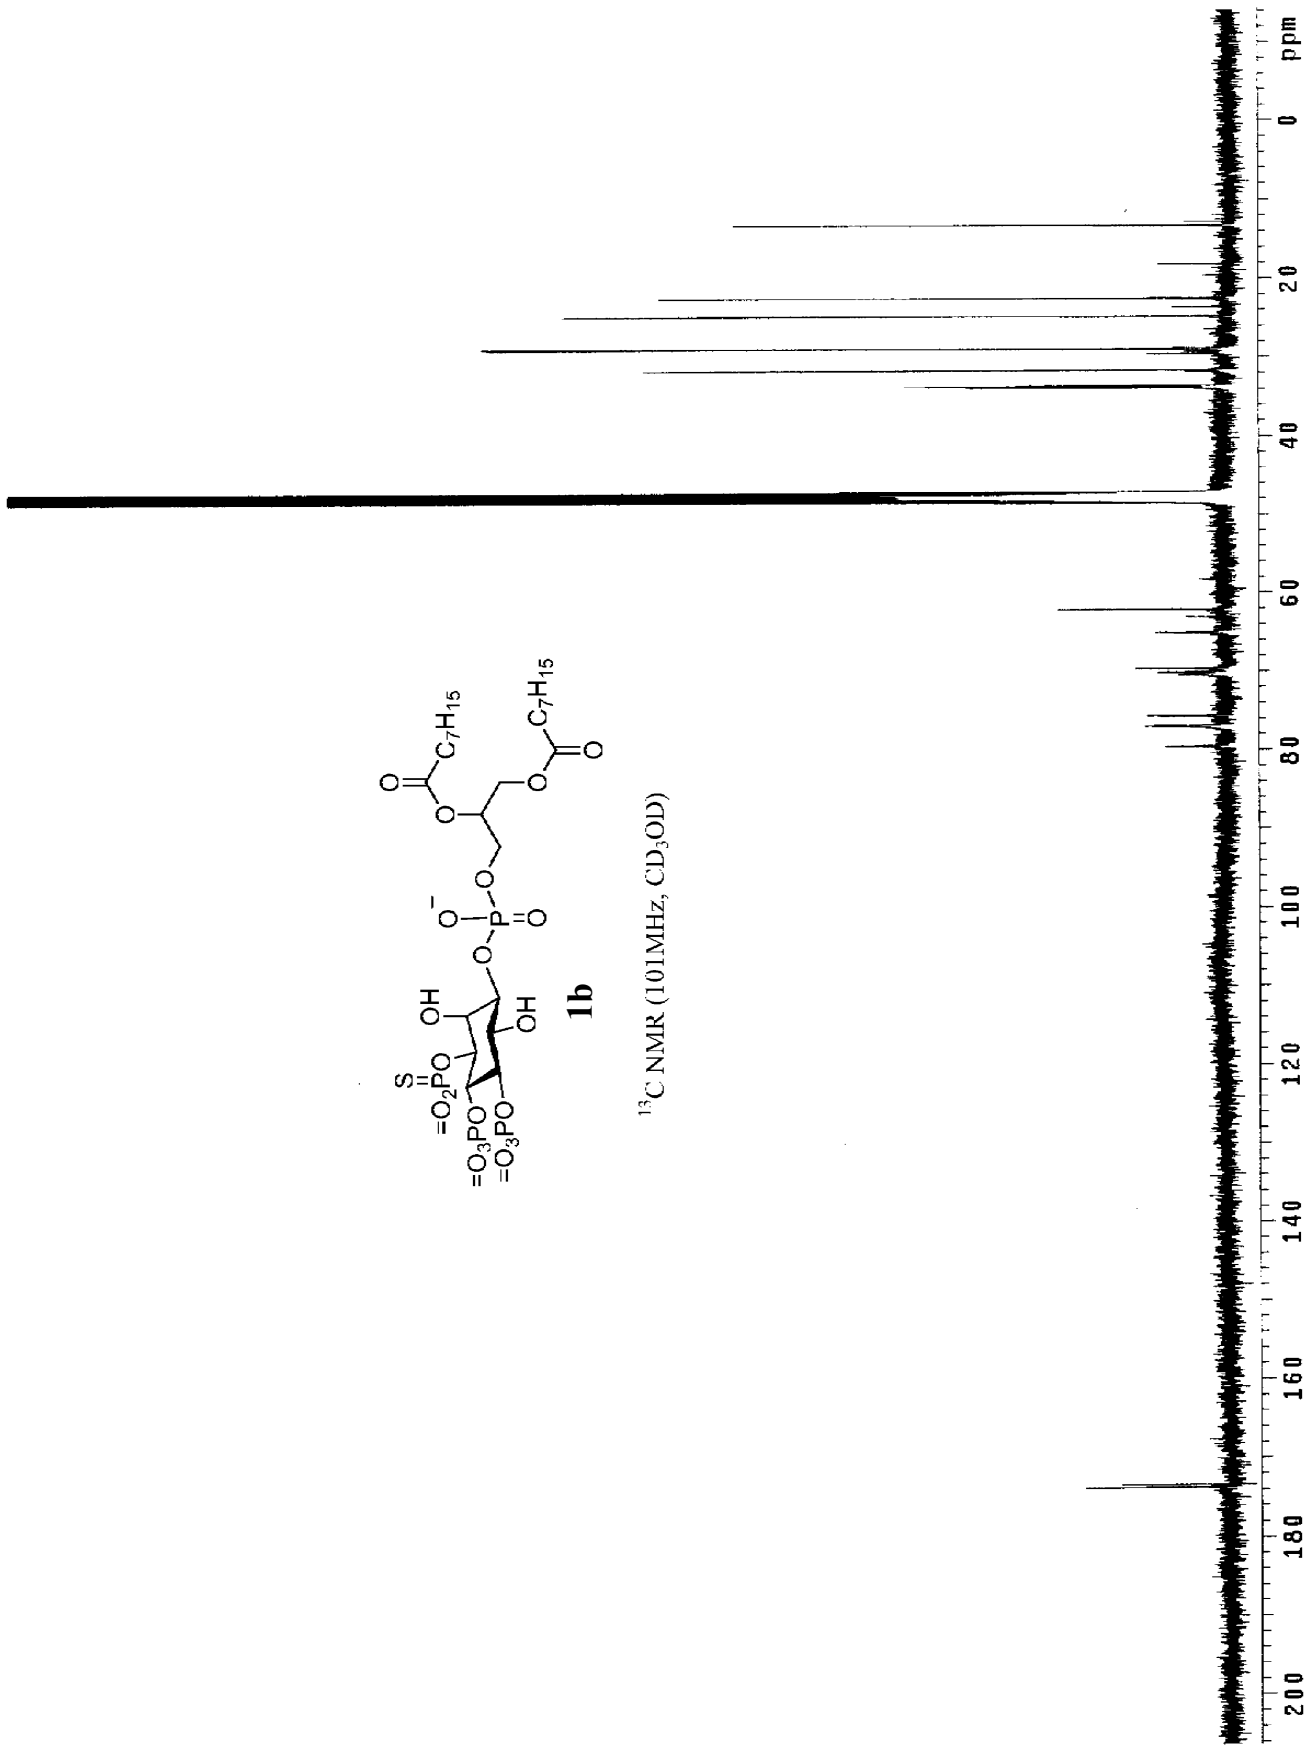

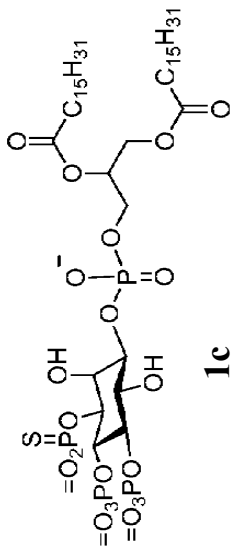

$^1\text{H NMR}$  (400 MHz,  $\text{CD}_3\text{OD}/\text{CDCl}_3$  - 3:1)

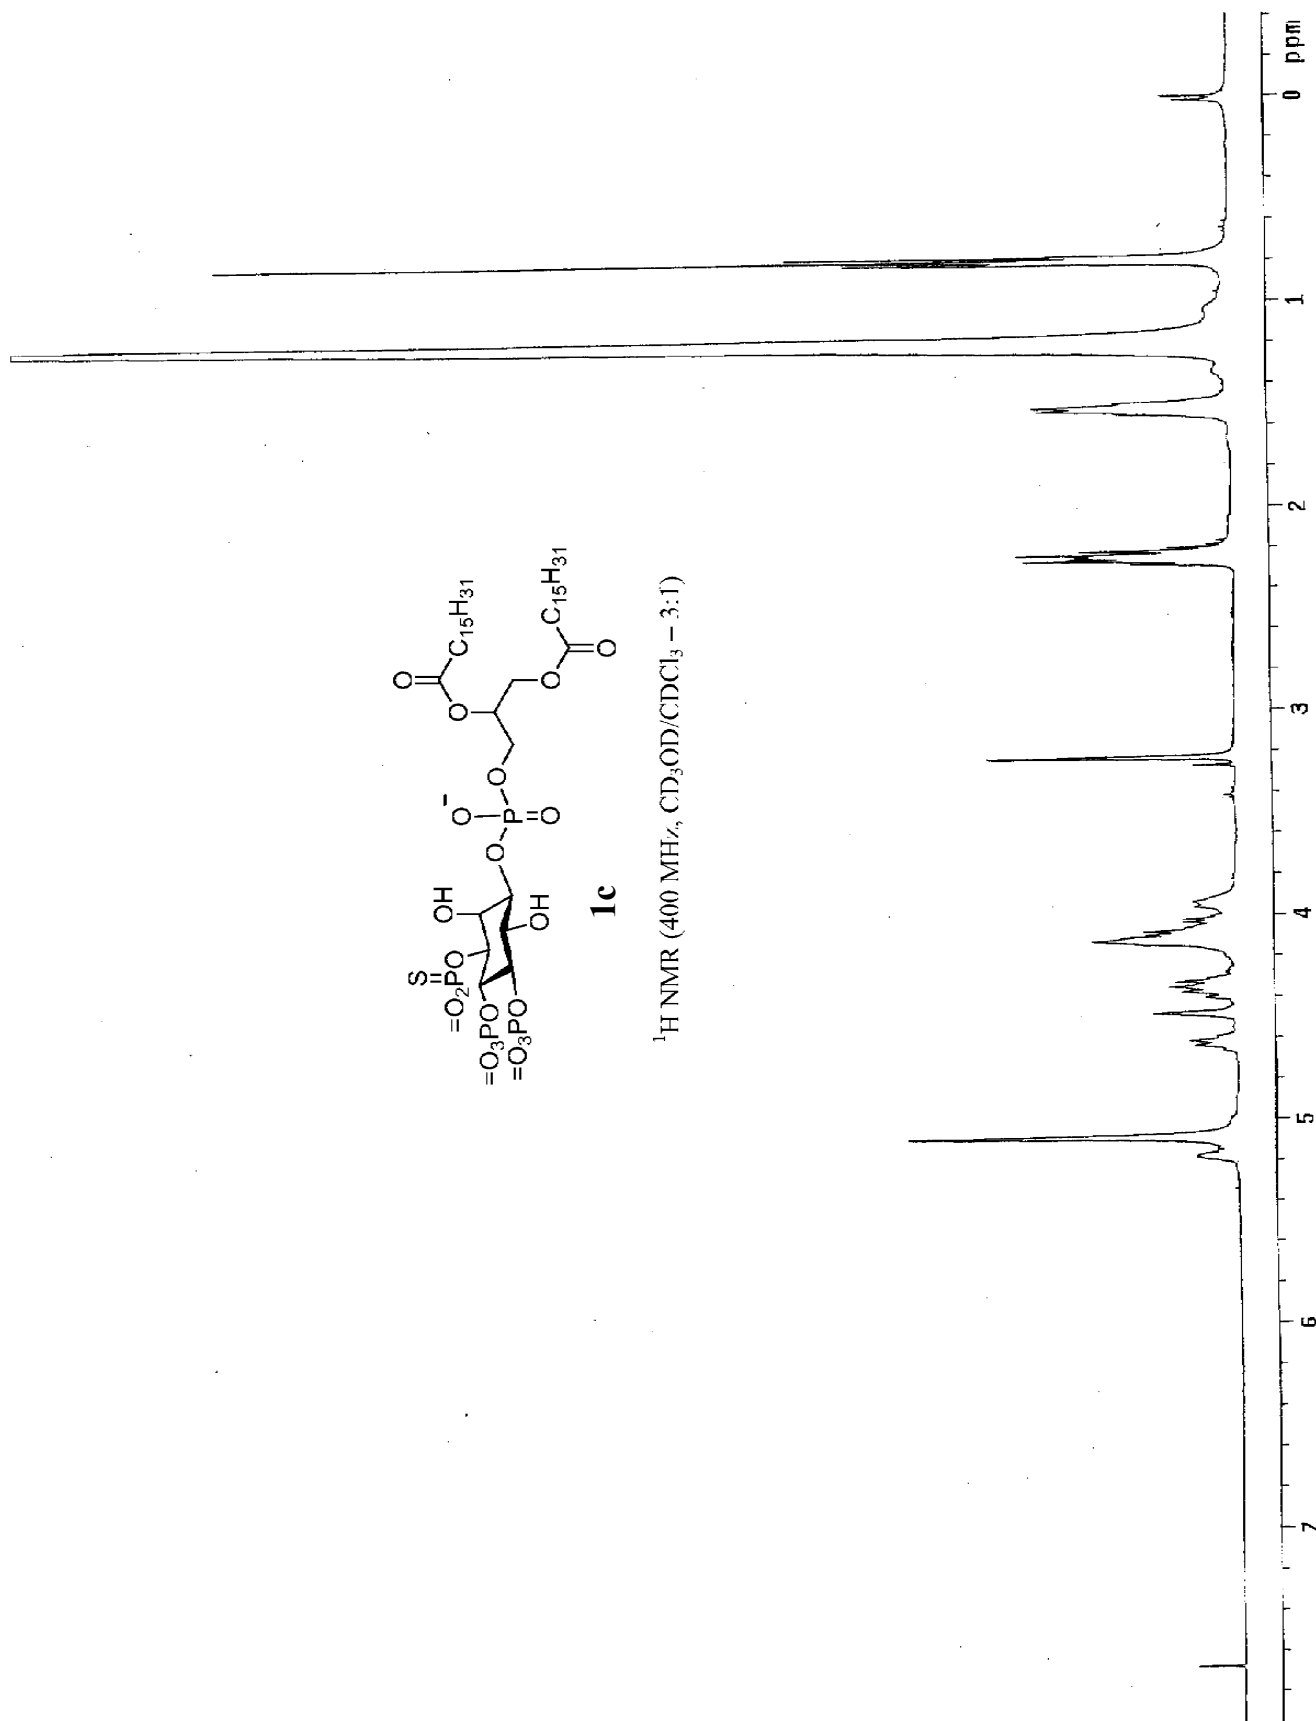

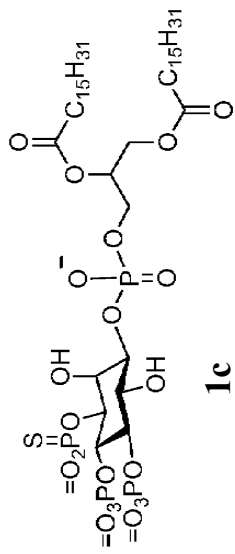

$^{31}\text{P}$  NMR (162 MHz,  $\text{CD}_3\text{OD}/\text{CDCl}_3 = 3:1$ )

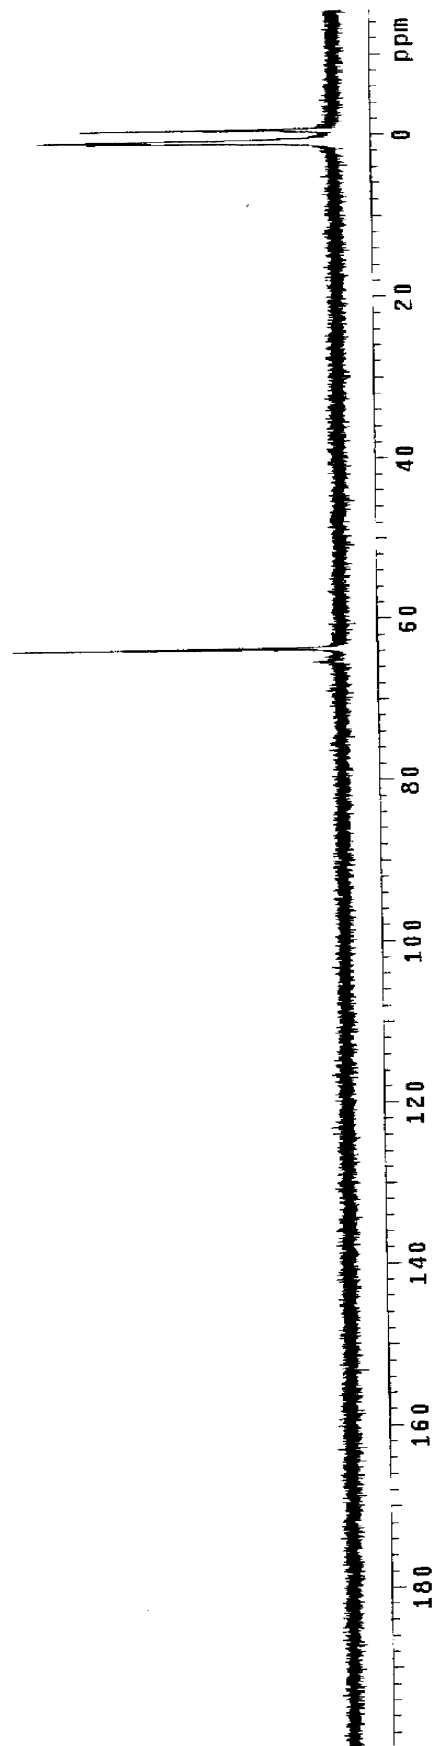

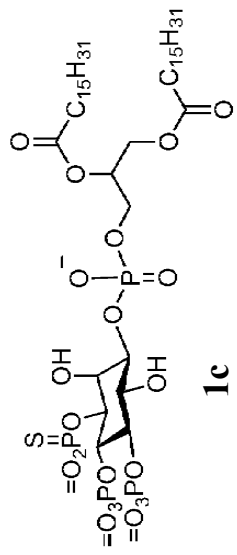

<sup>13</sup>C NMR (101 MHz, CD<sub>3</sub>OD/CDCl<sub>3</sub> = 3:1)

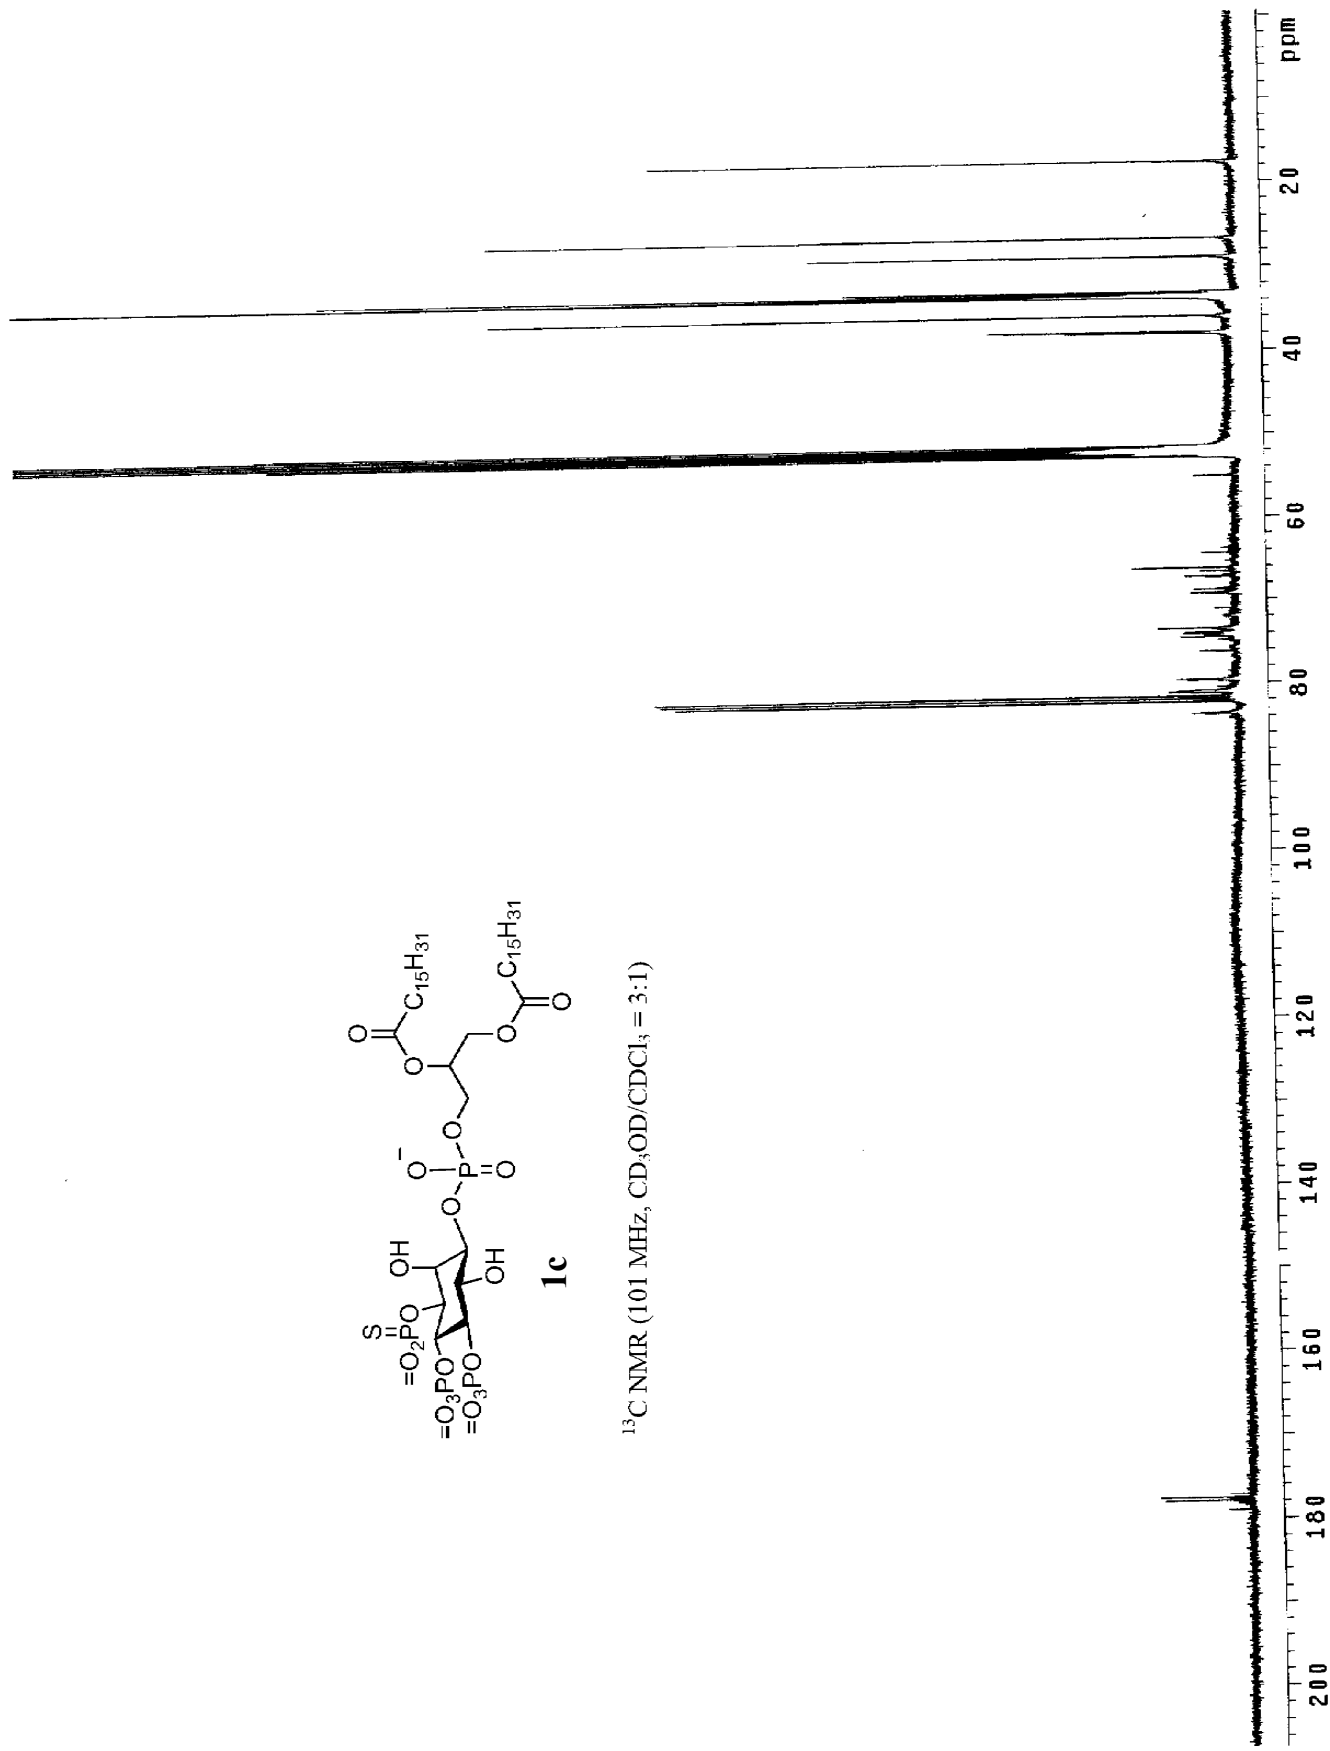

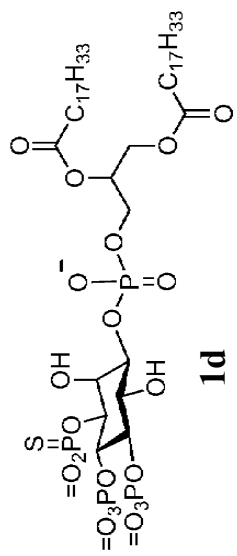

<sup>1</sup>H NMR (400 MHz, CD<sub>3</sub>OD)

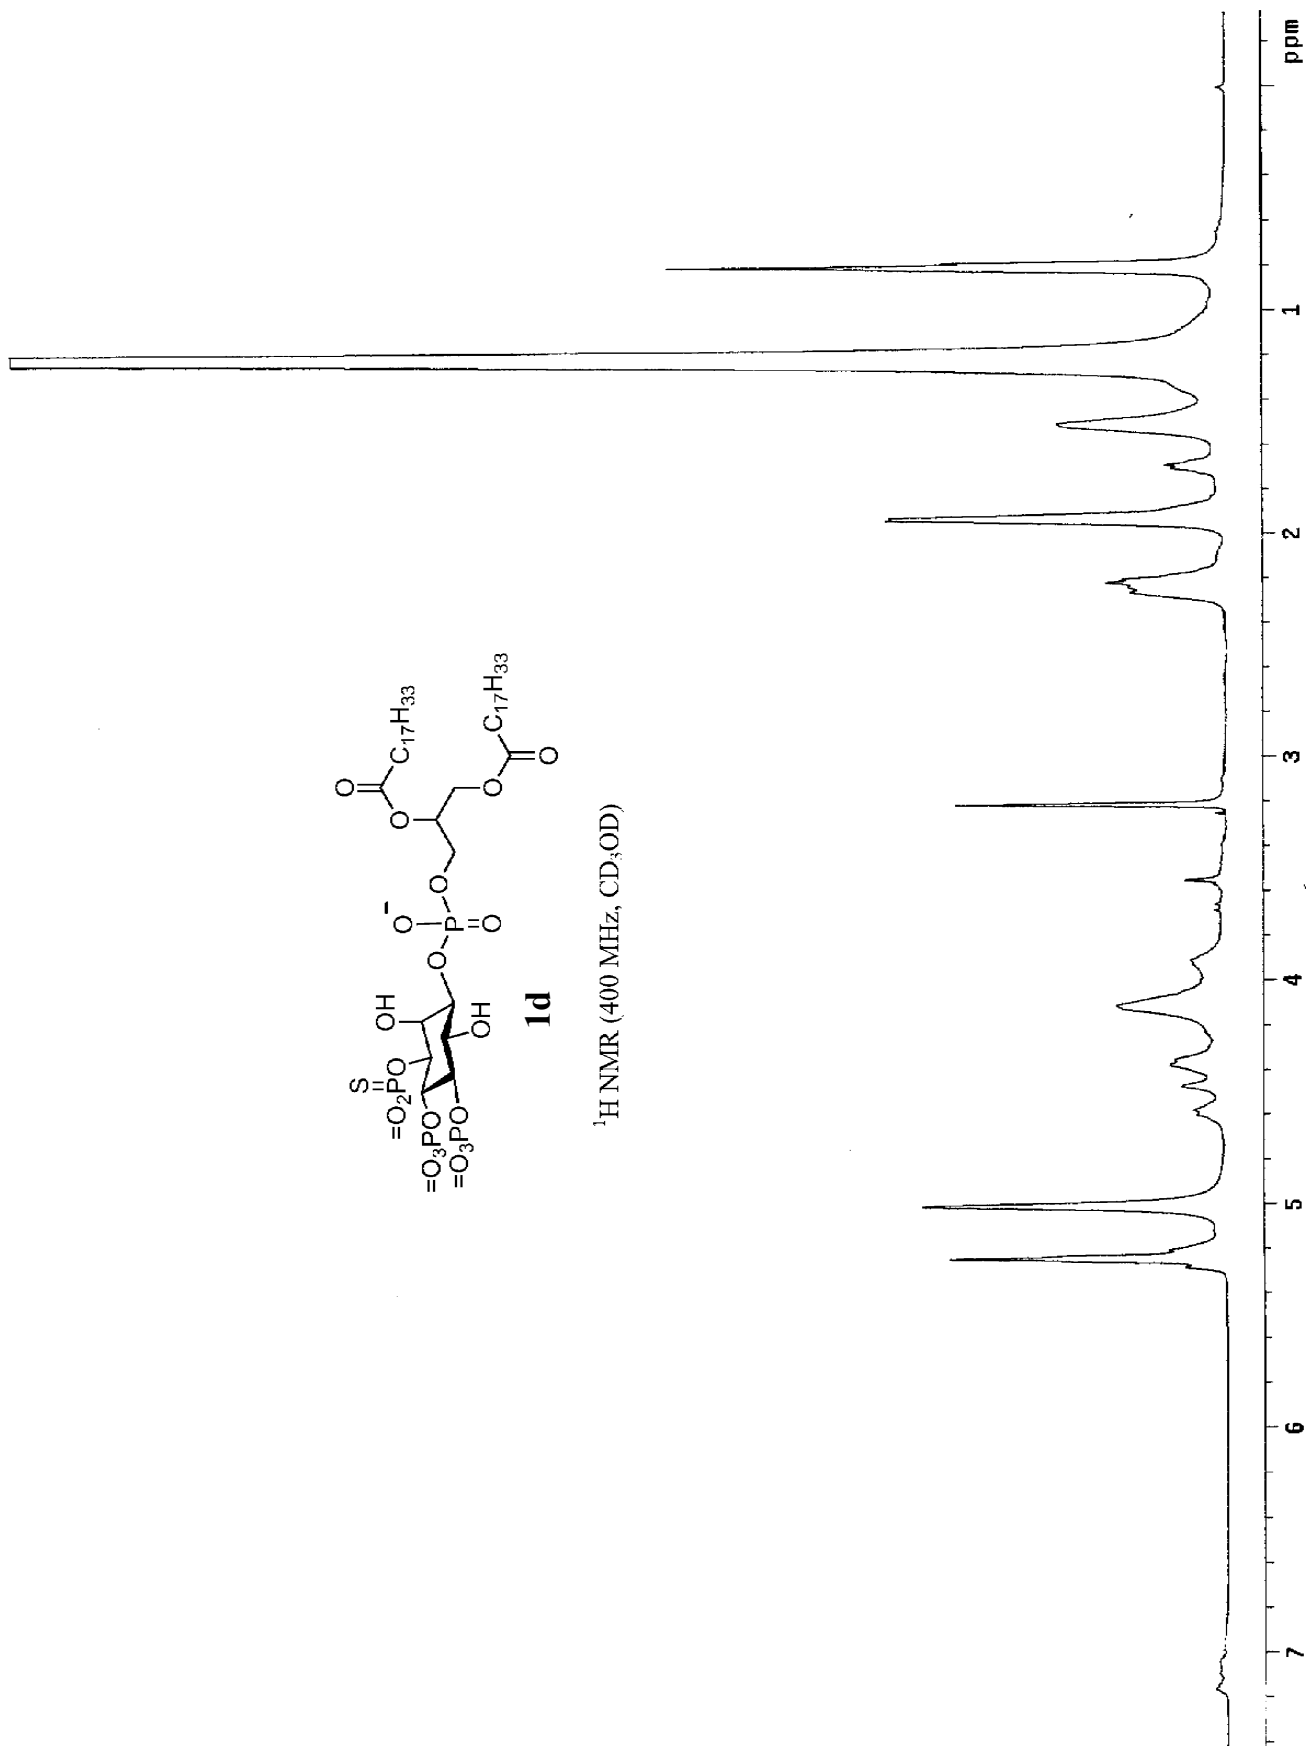

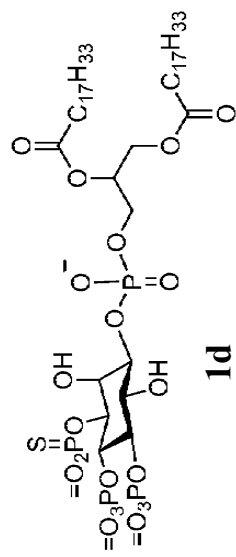

$^{31}\text{P}$  NMR (162 MHz,  $\text{CD}_3\text{OD}$ )

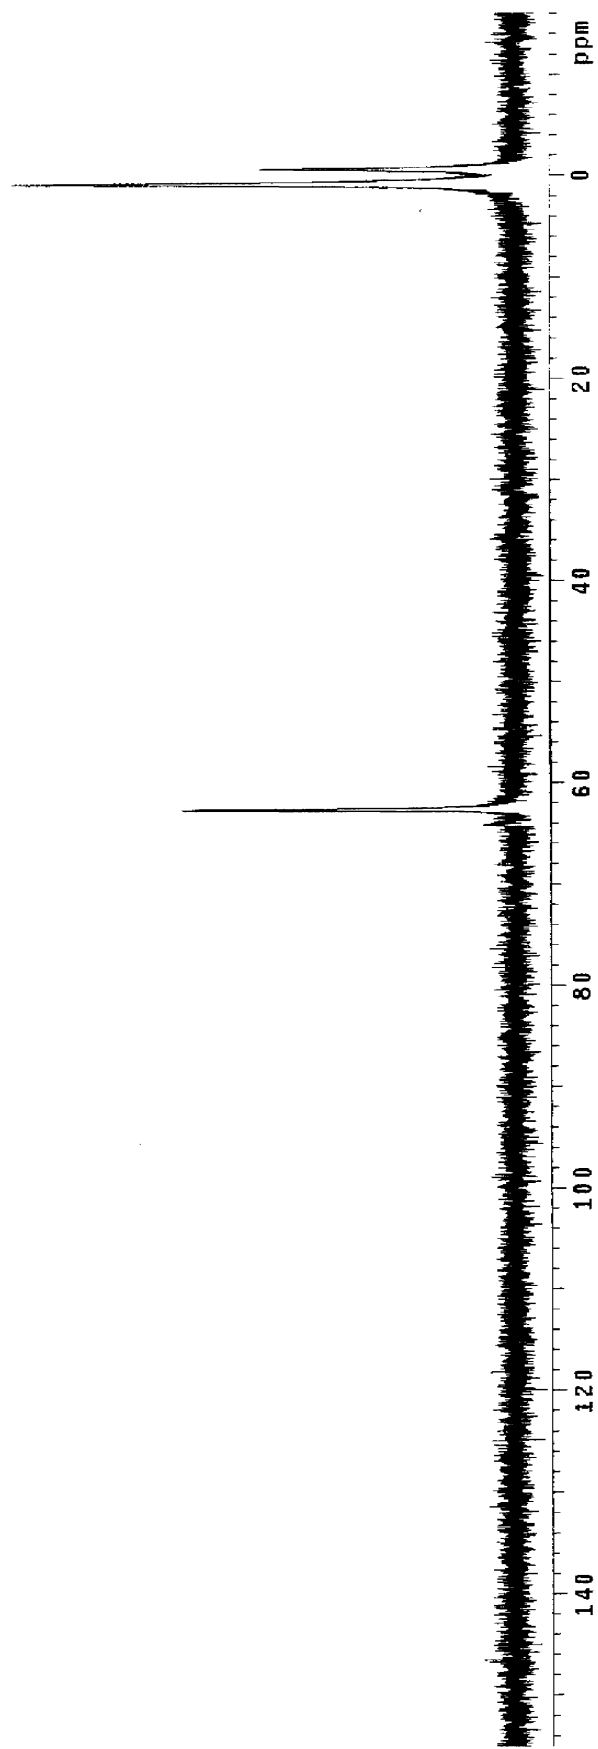

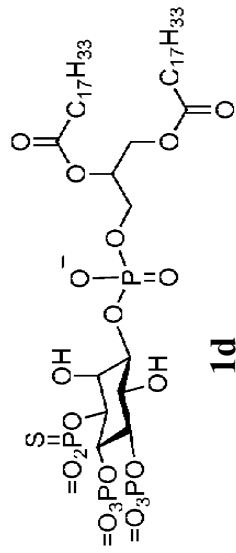

<sup>13</sup>C NMR (101 MHz, CD<sub>3</sub>OD)

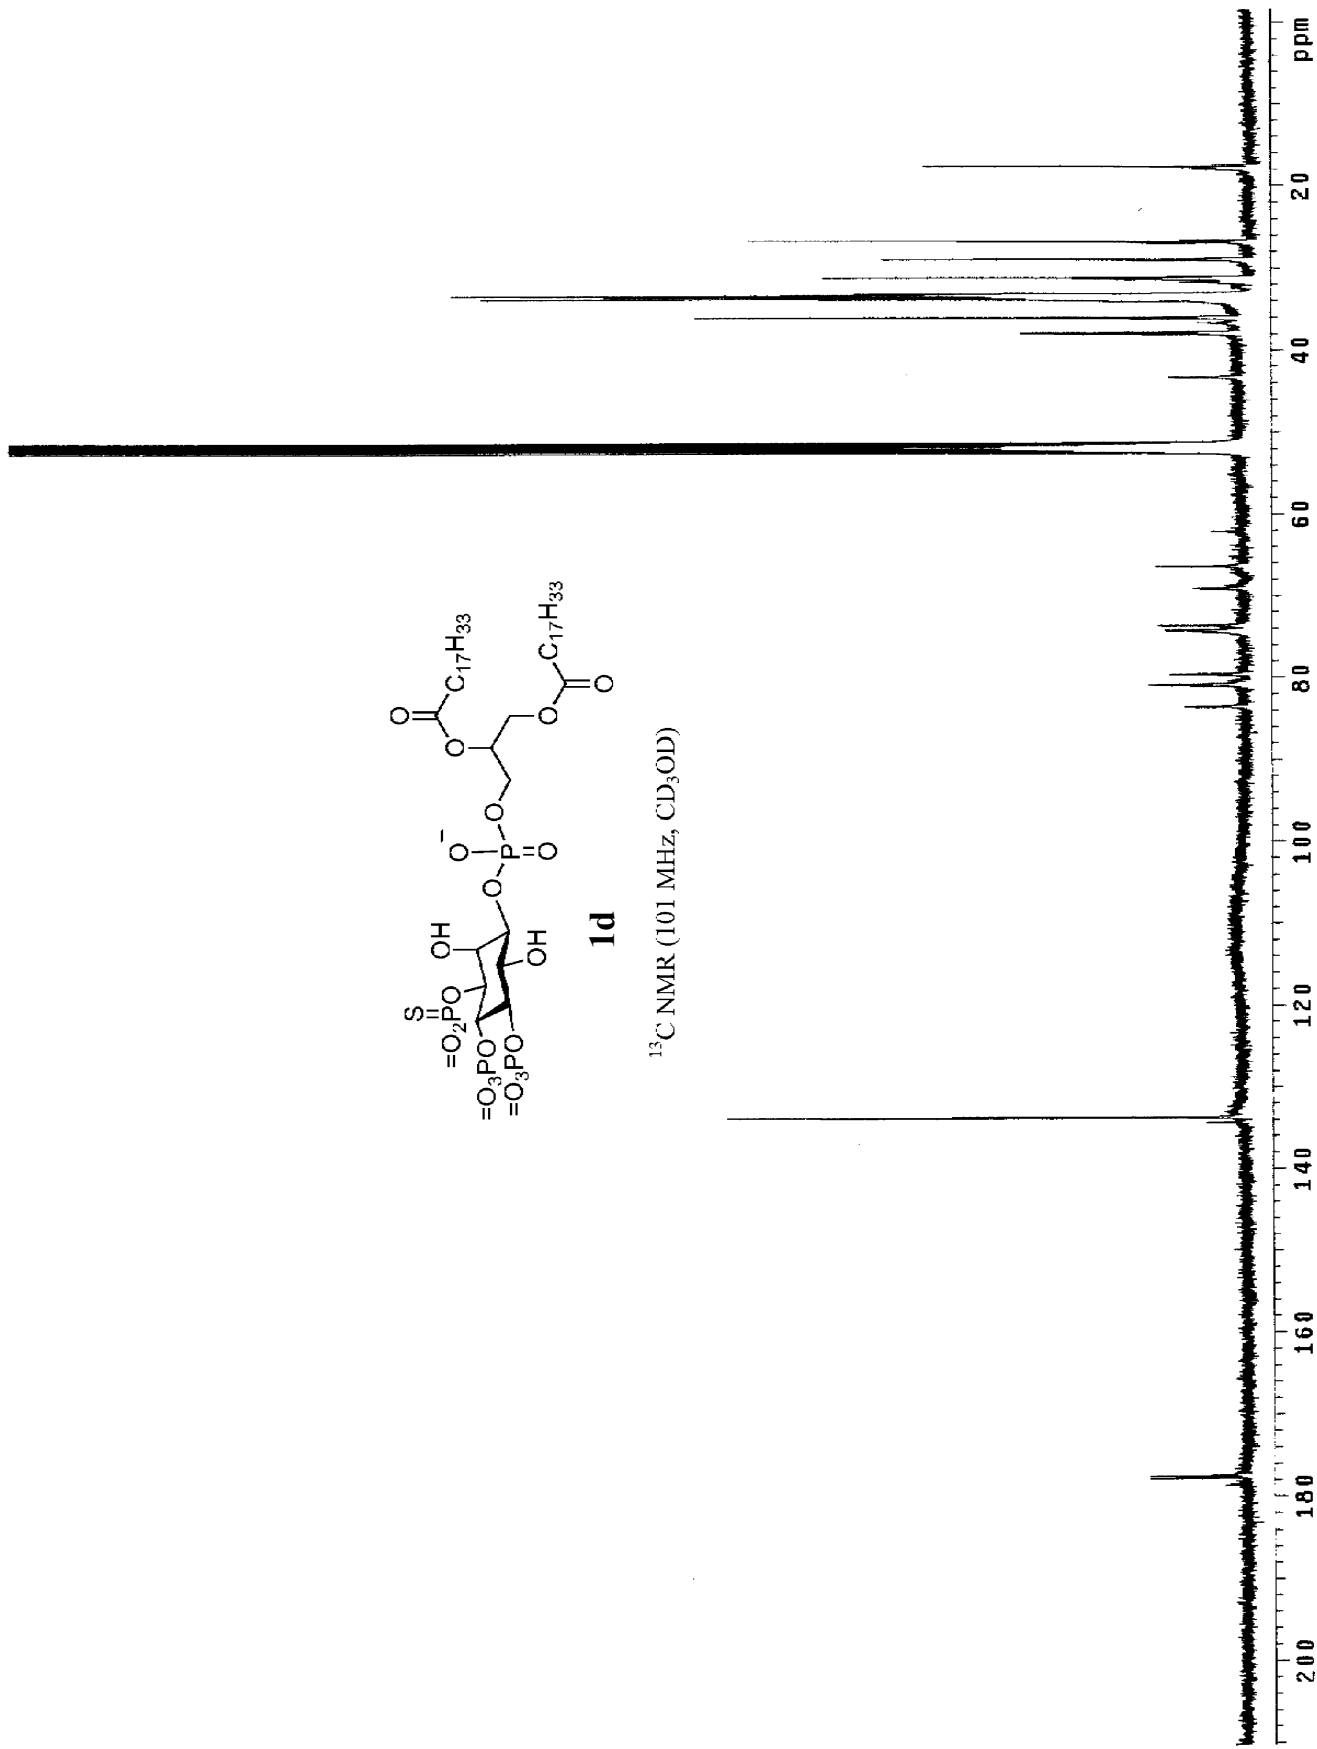

10H

zh22611

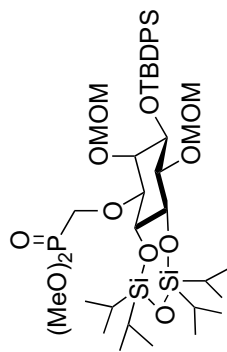

10

<sup>1</sup>H NMR (400 MHz, CDCl<sub>3</sub>)

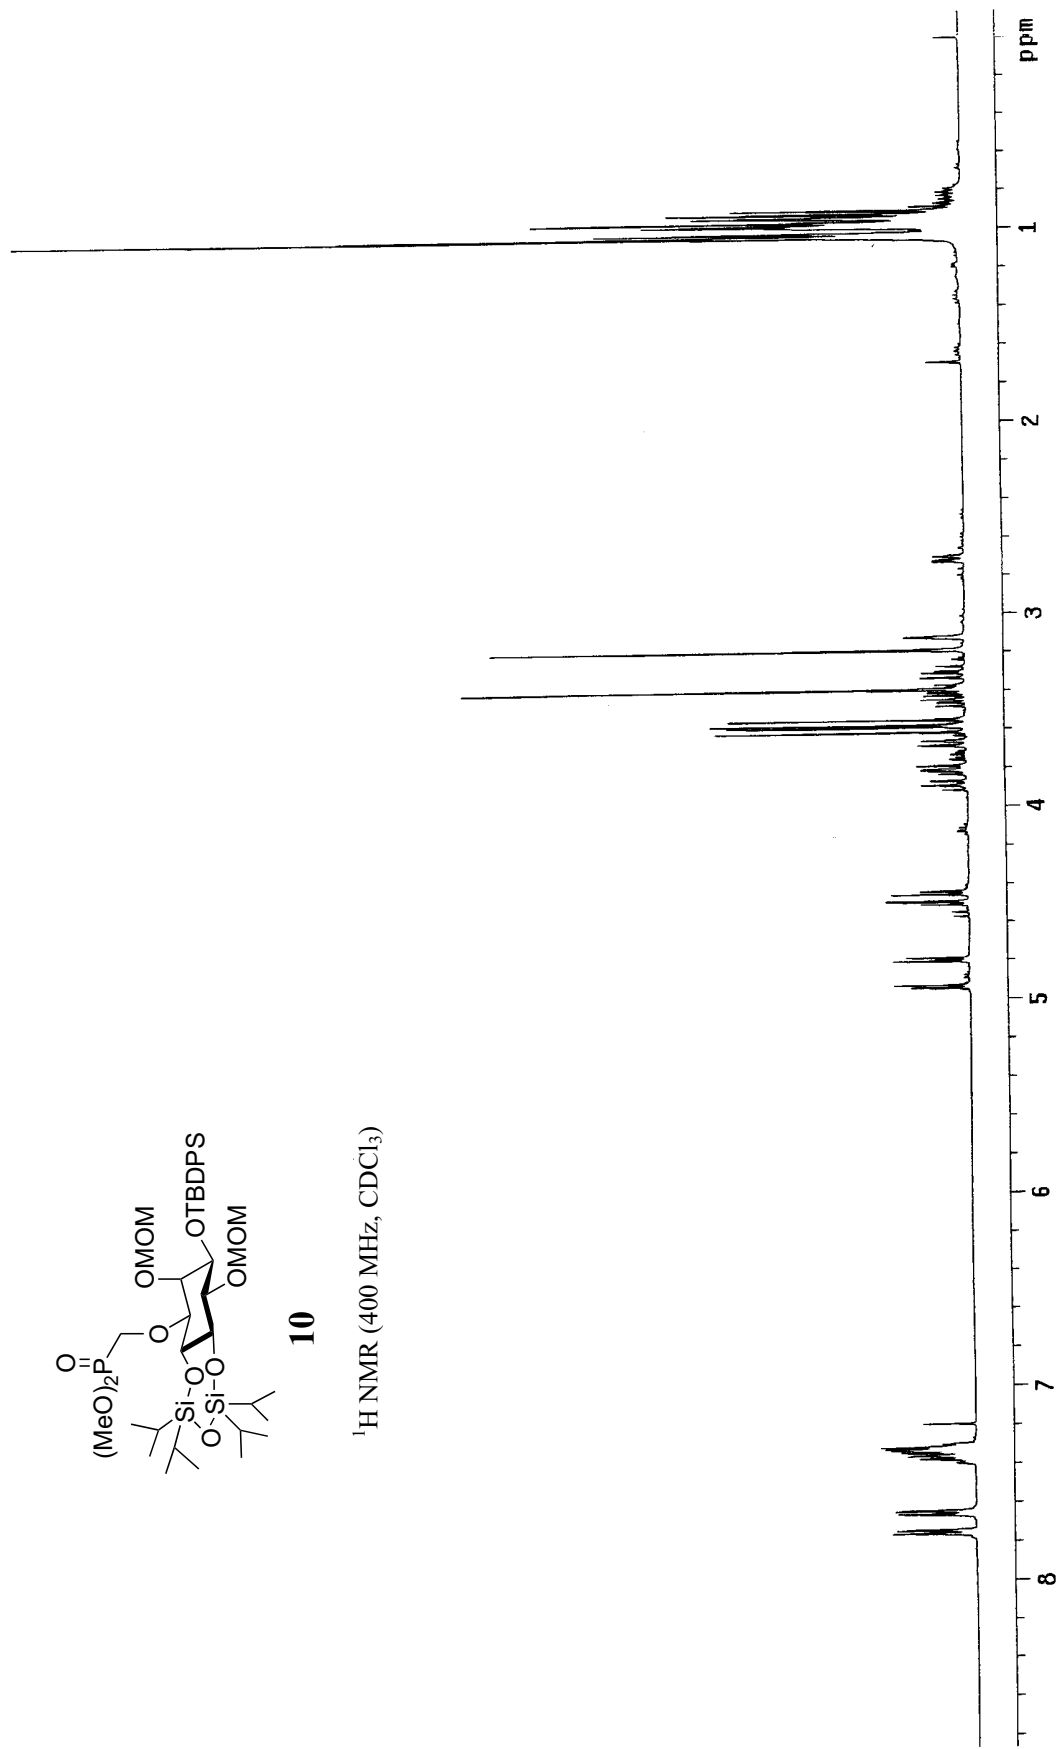



pp

zh22611P

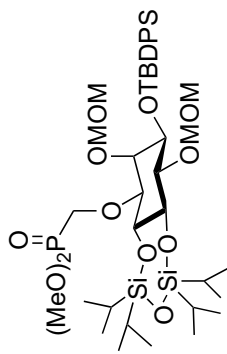

10

<sup>31</sup>P NMR (162 MHz, CDCl<sub>3</sub>)

24.728

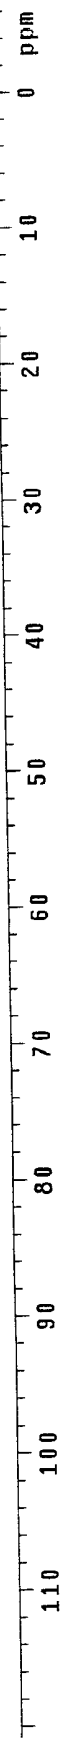

10c

ZH22611C

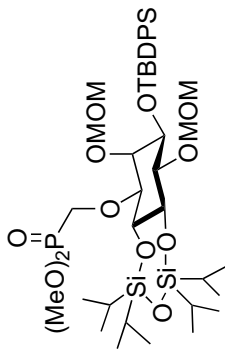

10

$^{13}\text{C}$  NMR (101 MHz,  $\text{CDCl}_3$ )

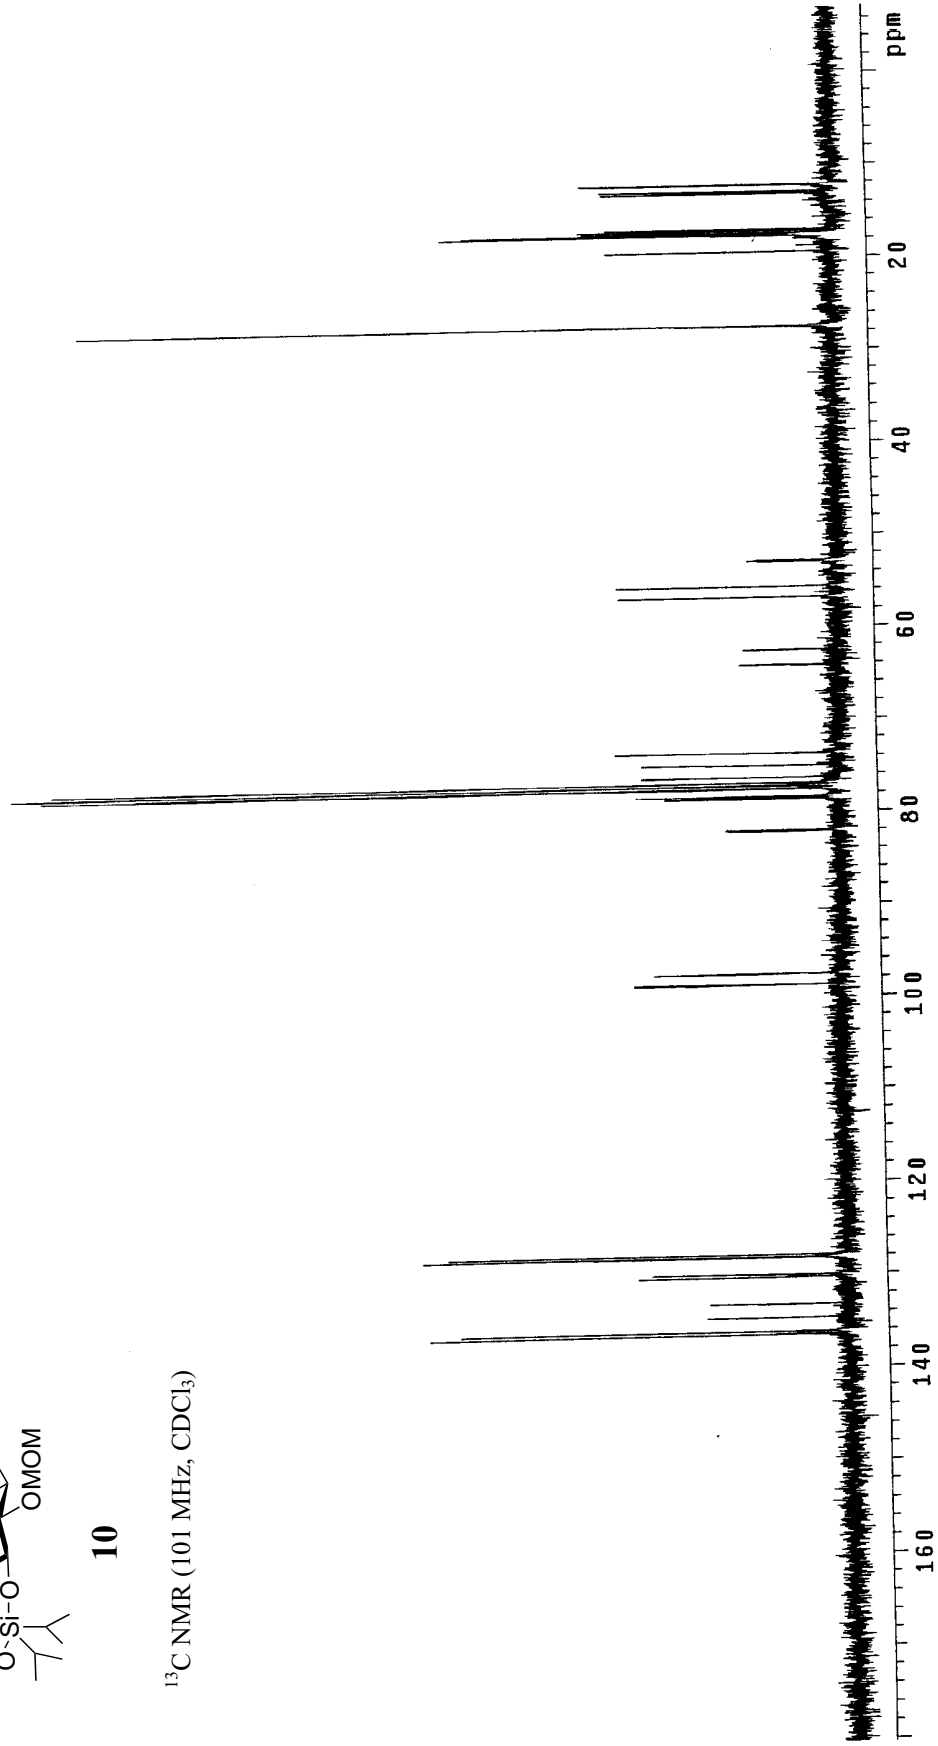

114  
ZH30191

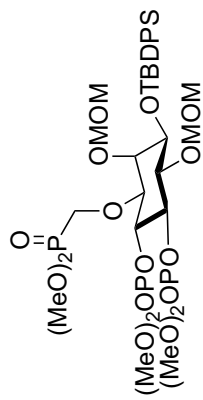

11

$^1\text{H}$  NMR (400 MHz,  $\text{CDCl}_3$ )

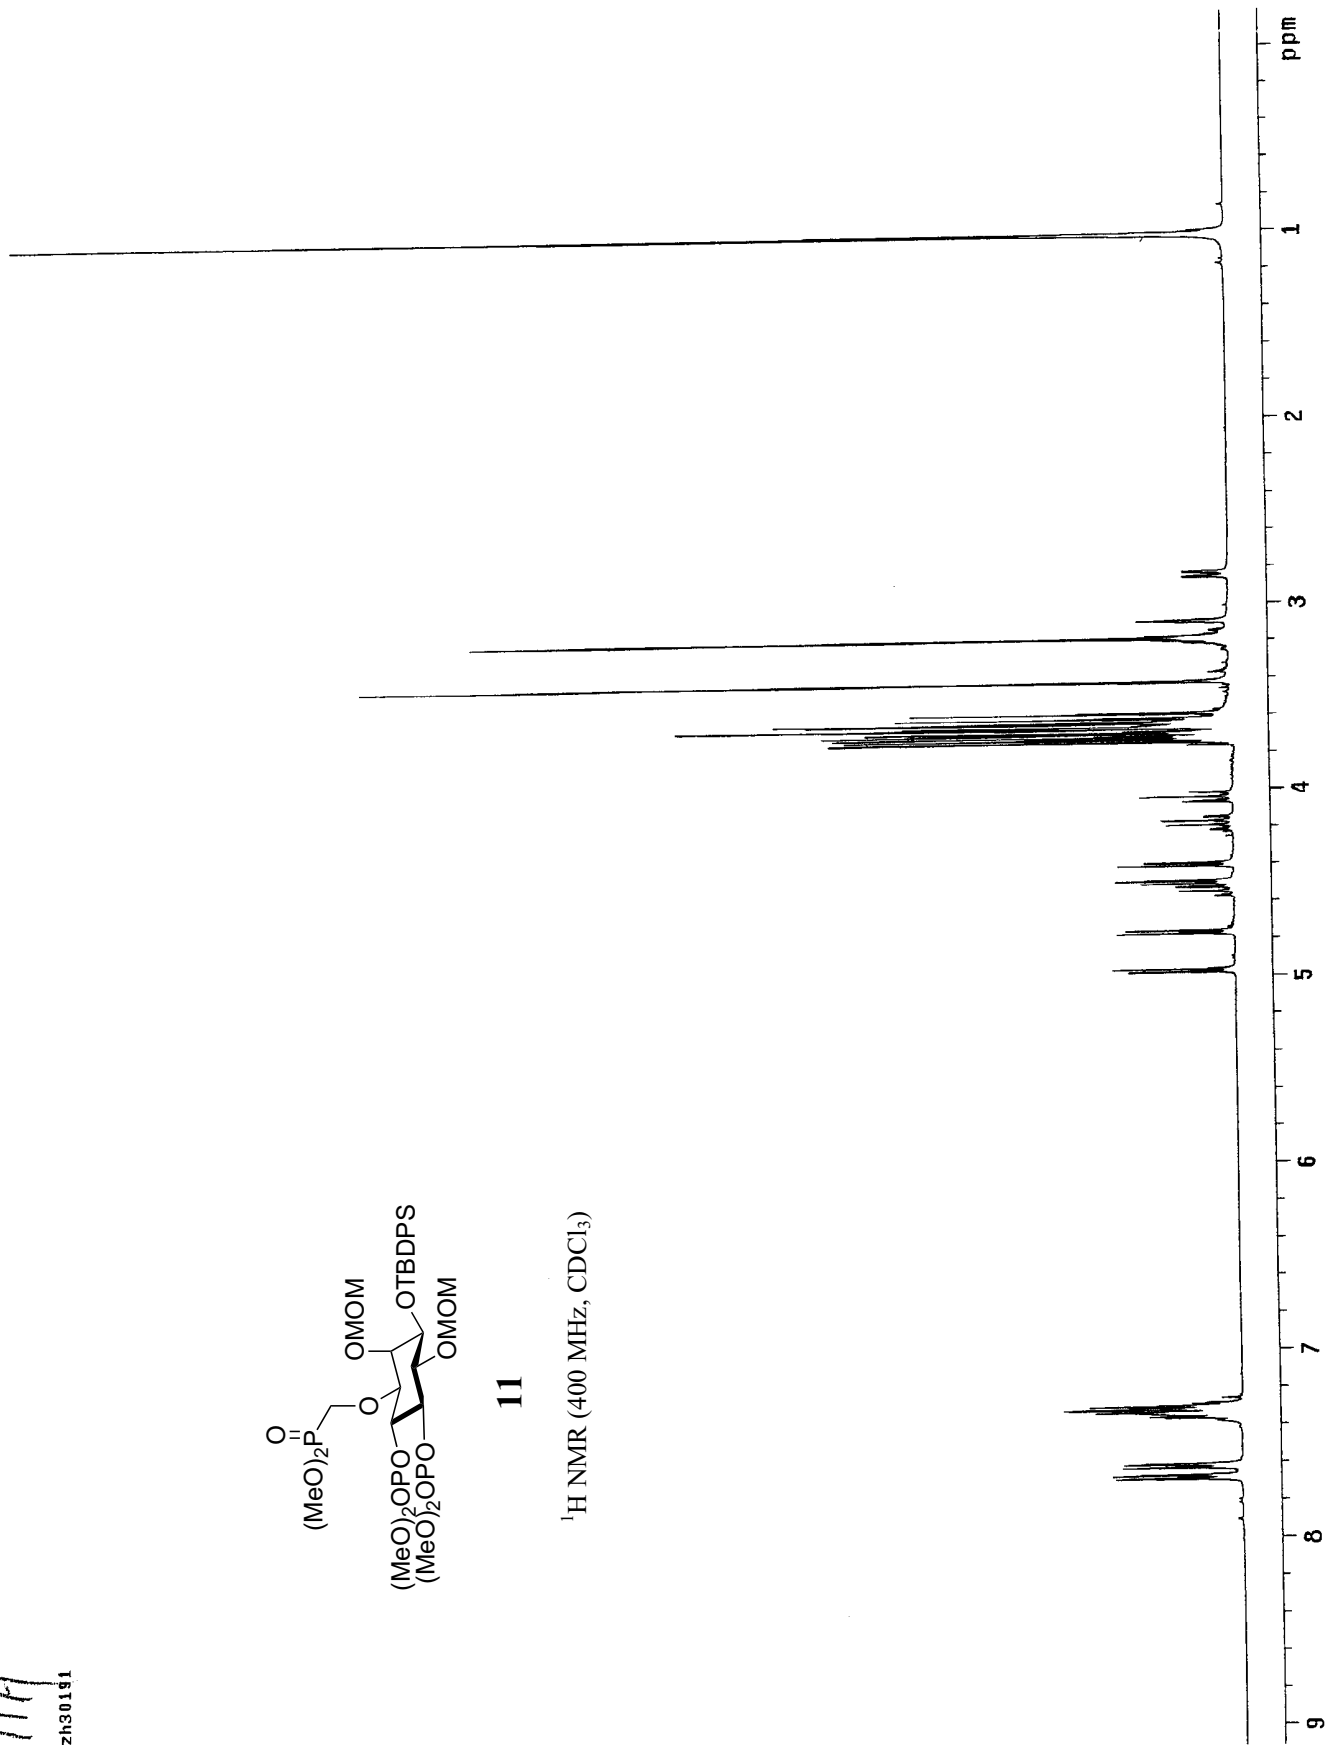

11P  
ZH30191P

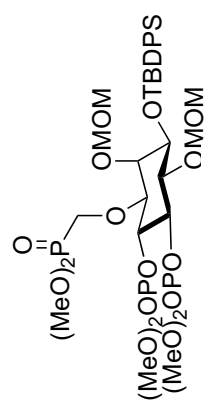

11

$^{31}\text{P}$  NMR (162 MHz,  $\text{CDCl}_3$ )

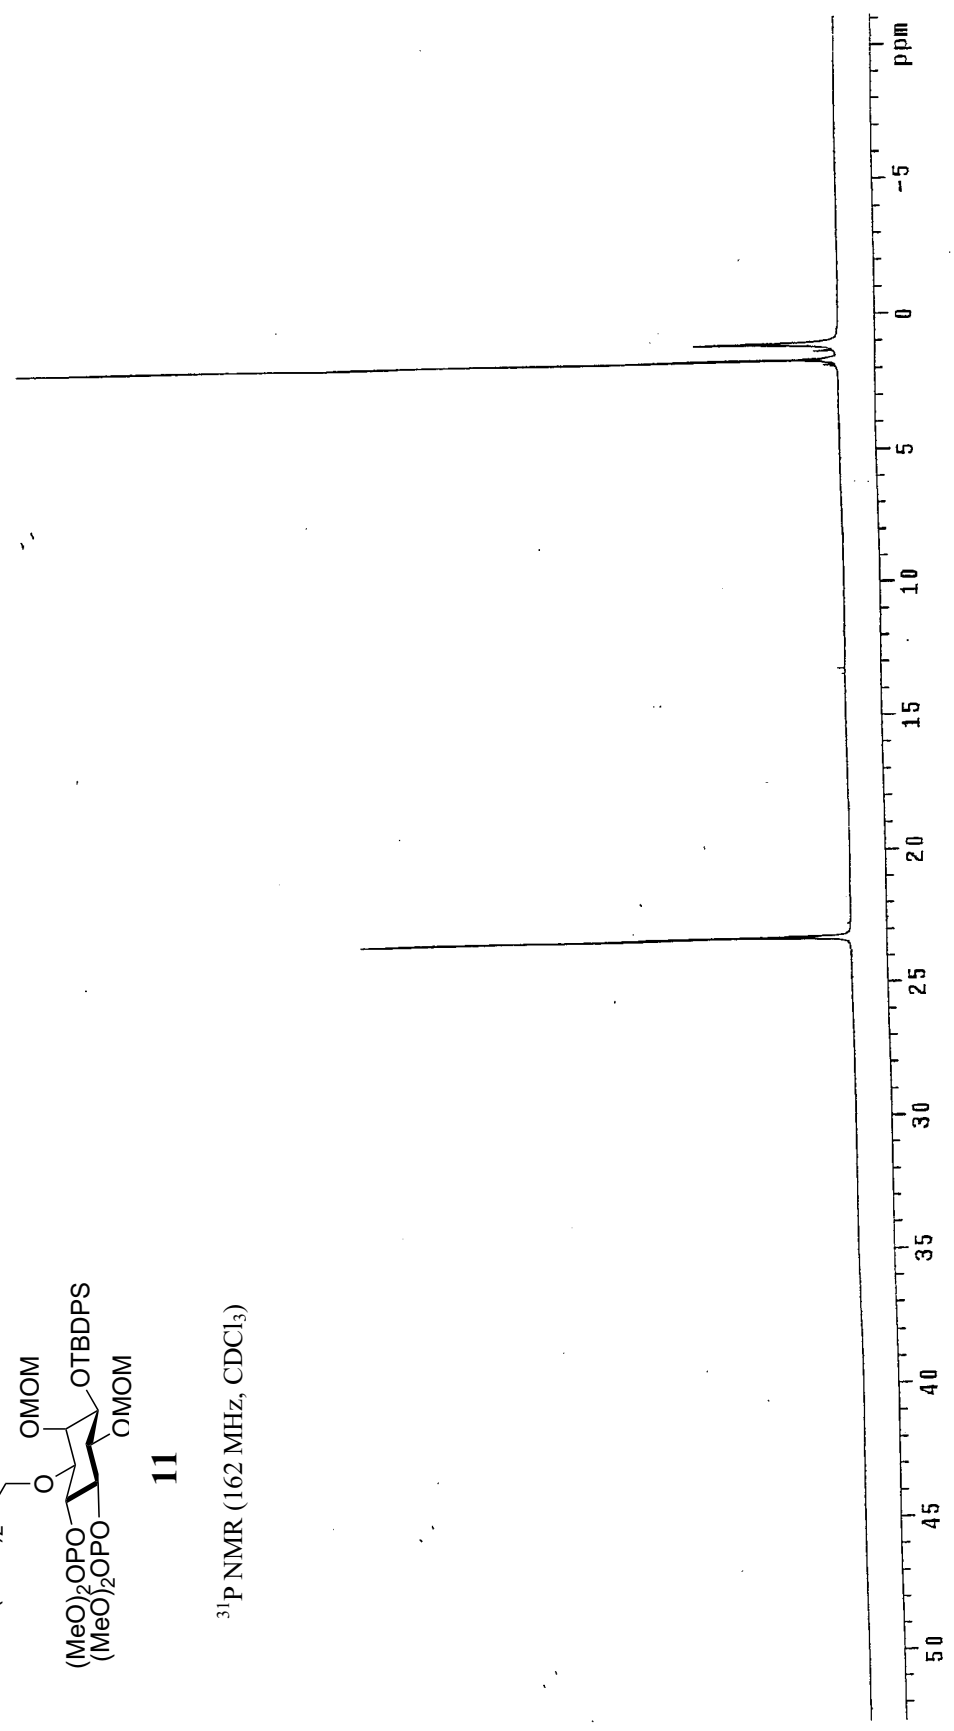

11c

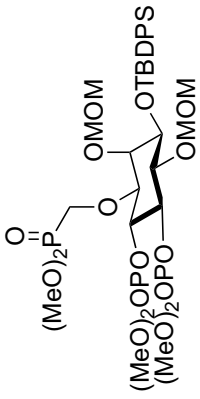

11

$^{13}\text{C}$  NMR (101 MHz,  $\text{CDCl}_3$ )

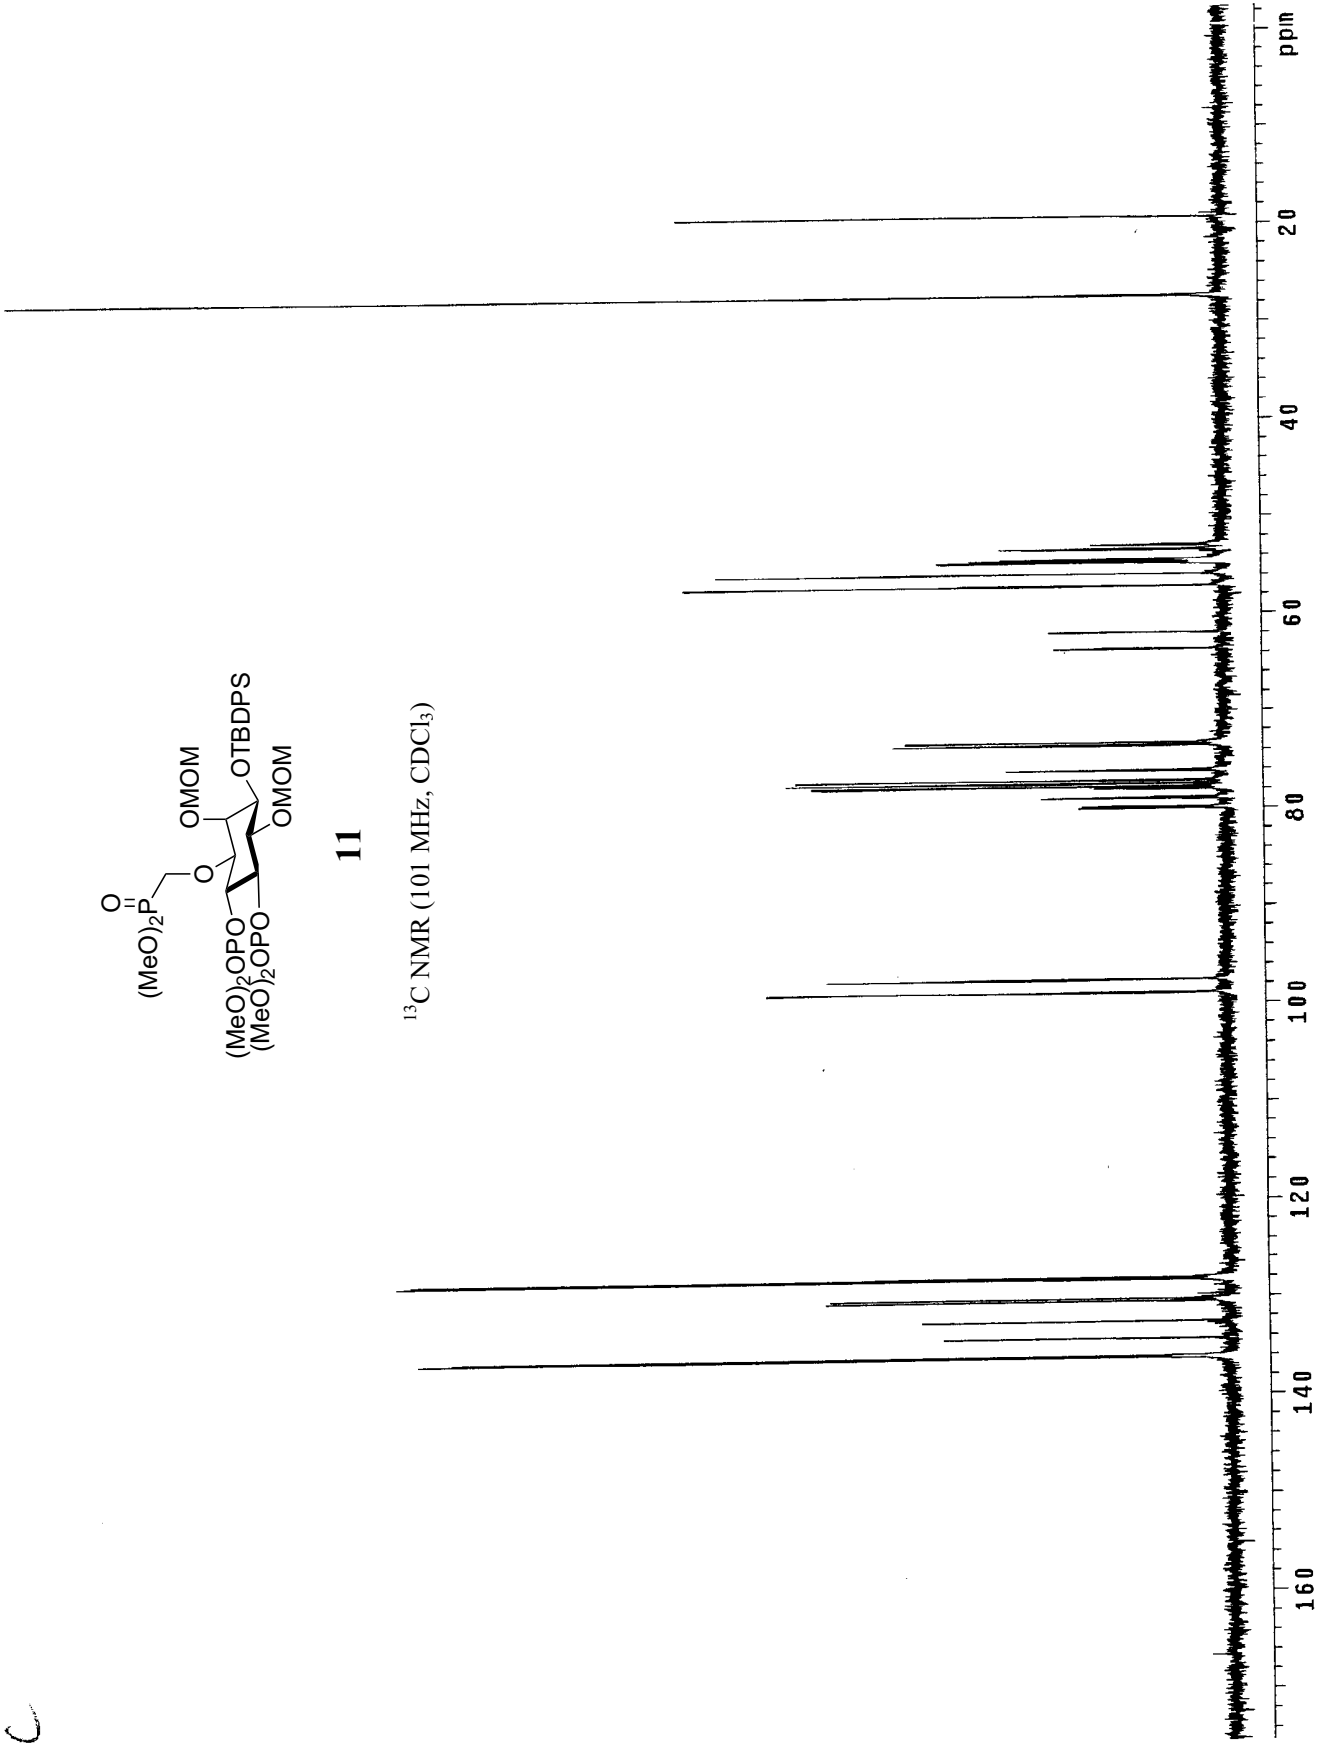

12aH

zh30231

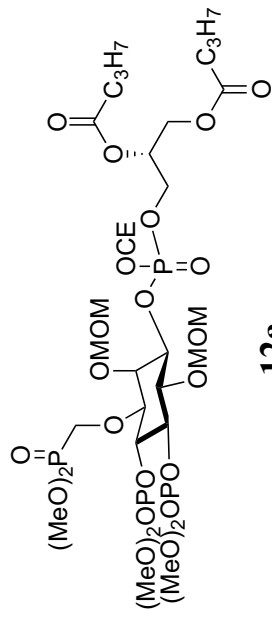

**12a**

$^1\text{H NMR}$  (400 MHz,  $\text{CDCl}_3$ )

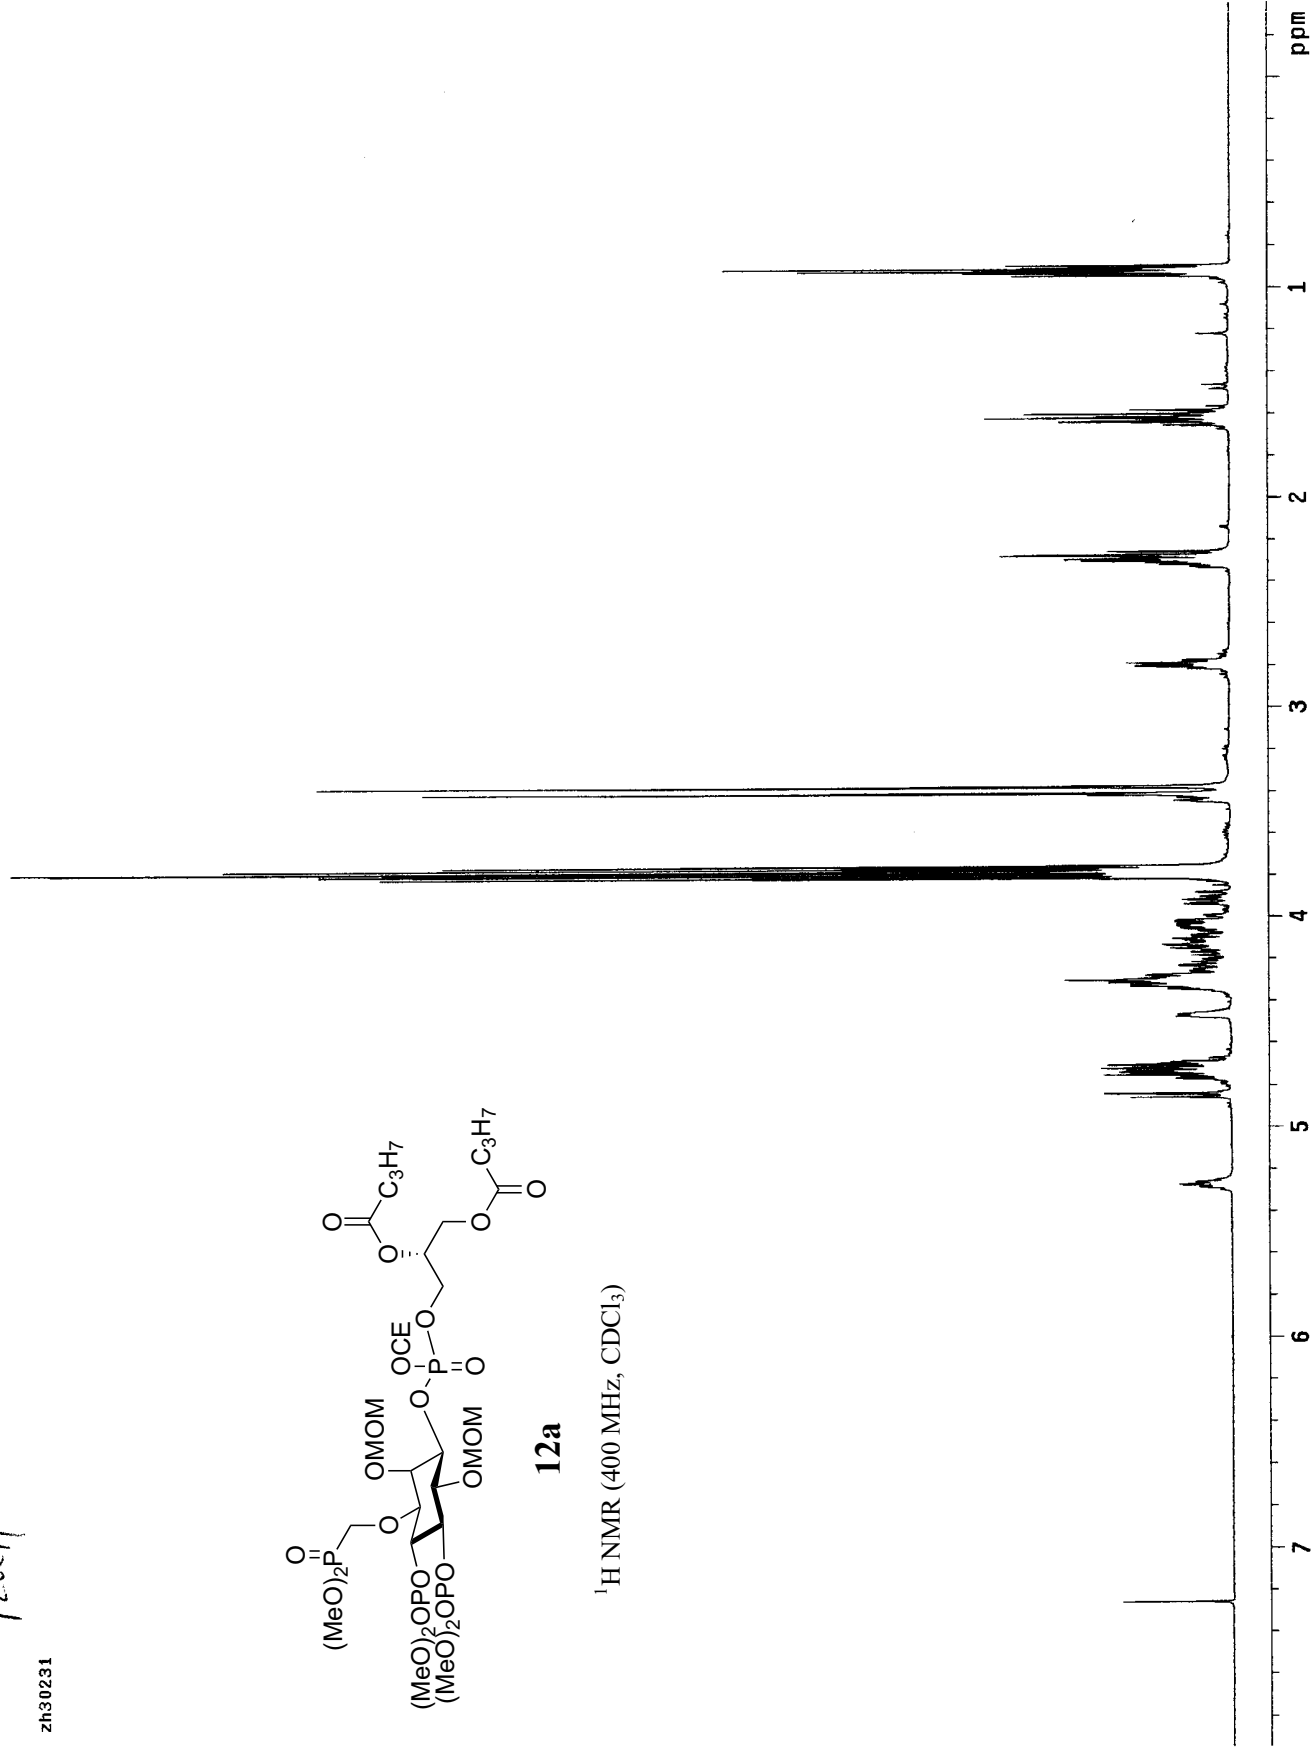

rap

zh30231P

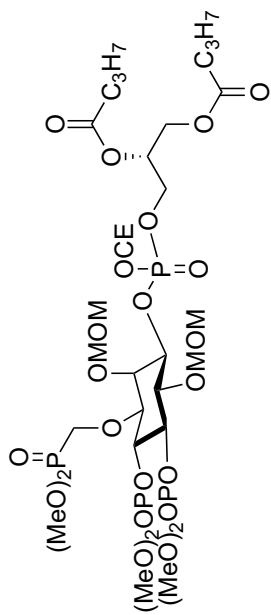

12a

$^3\text{P}$  NMR (162 MHz,  $\text{CDCl}_3$ )

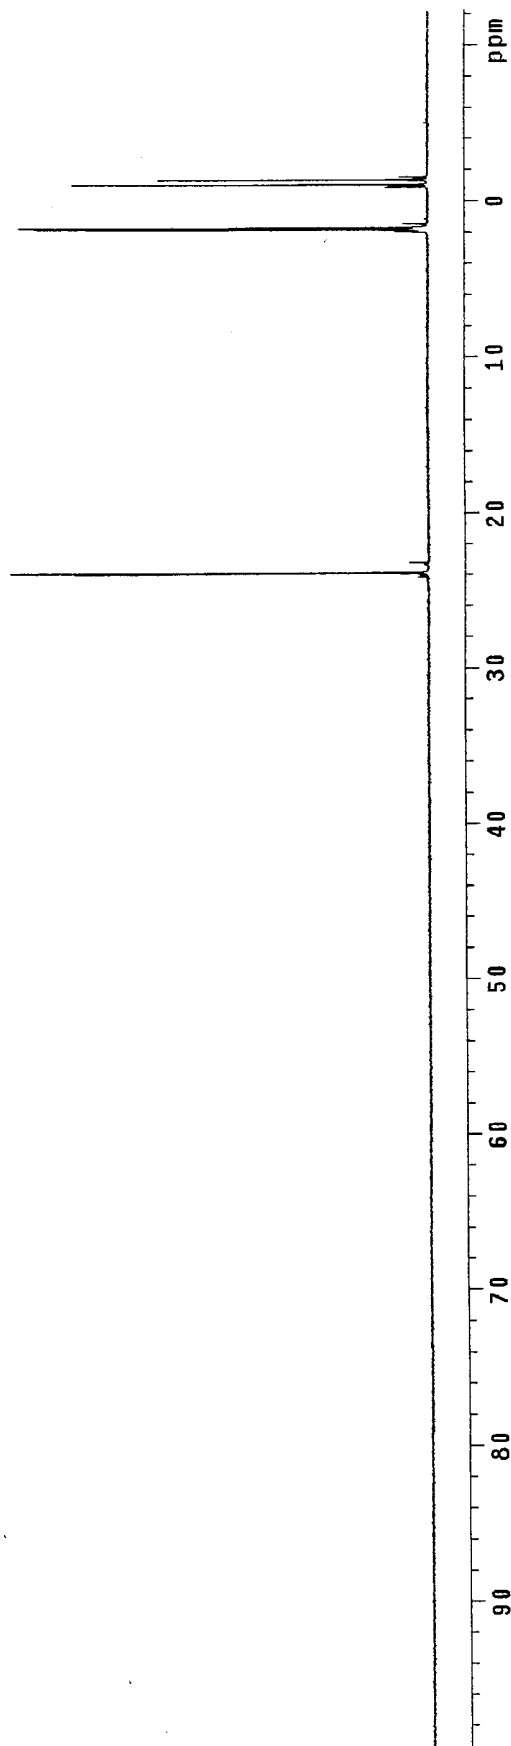

12ac

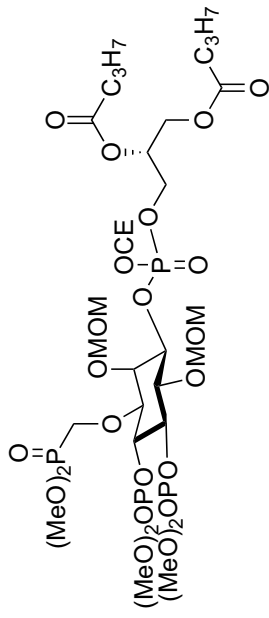

**12a**

<sup>13</sup>C NMR (101 MHz, CDCl<sub>3</sub>)

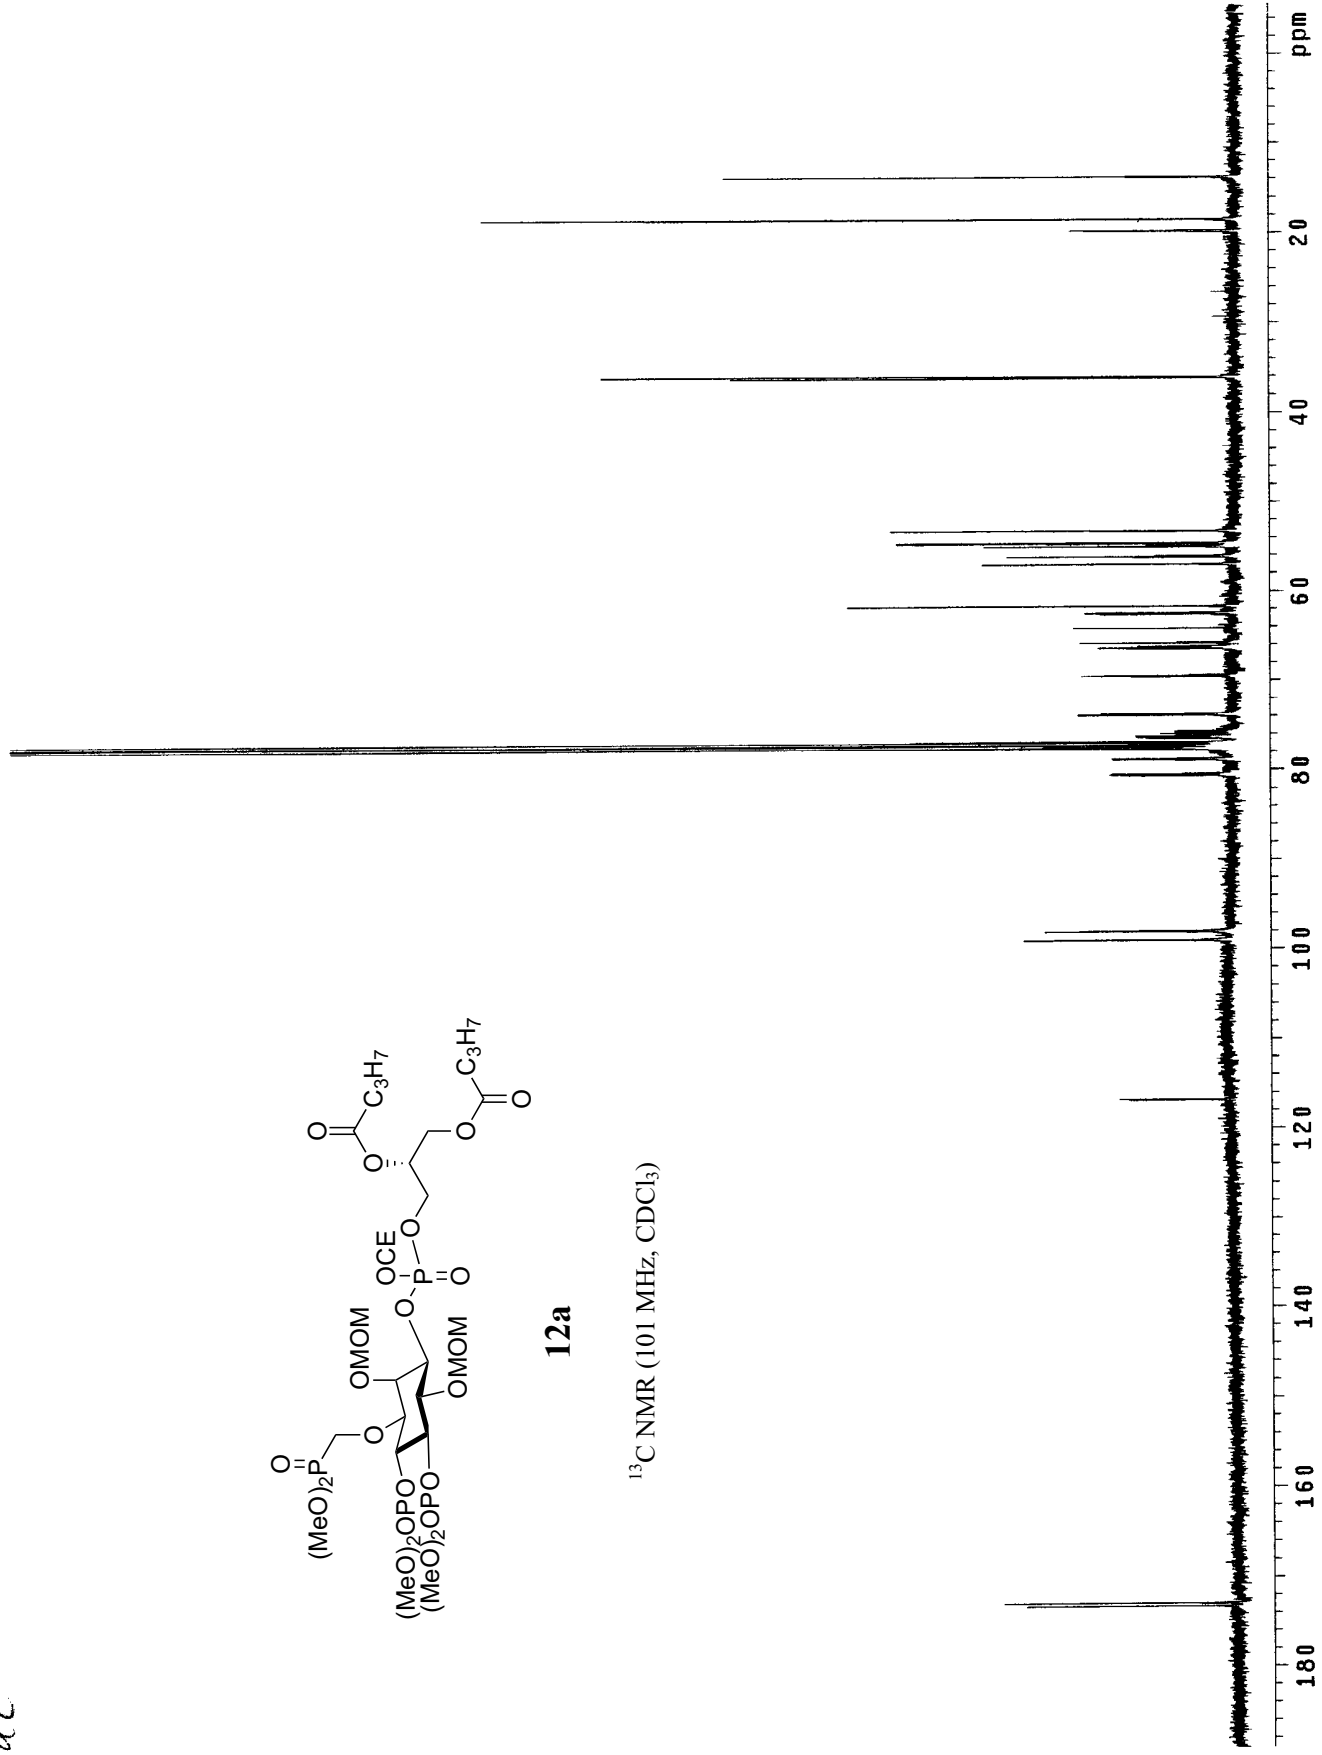



126H

zh30251

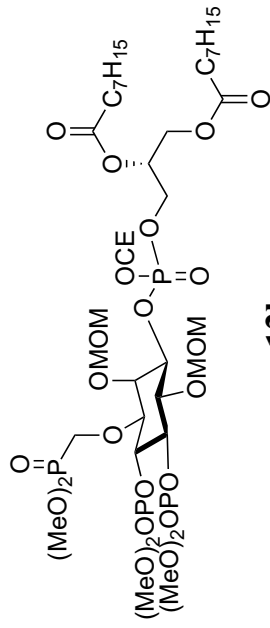

**12b**

<sup>1</sup>H NMR (400 MHz, CDCl<sub>3</sub>)

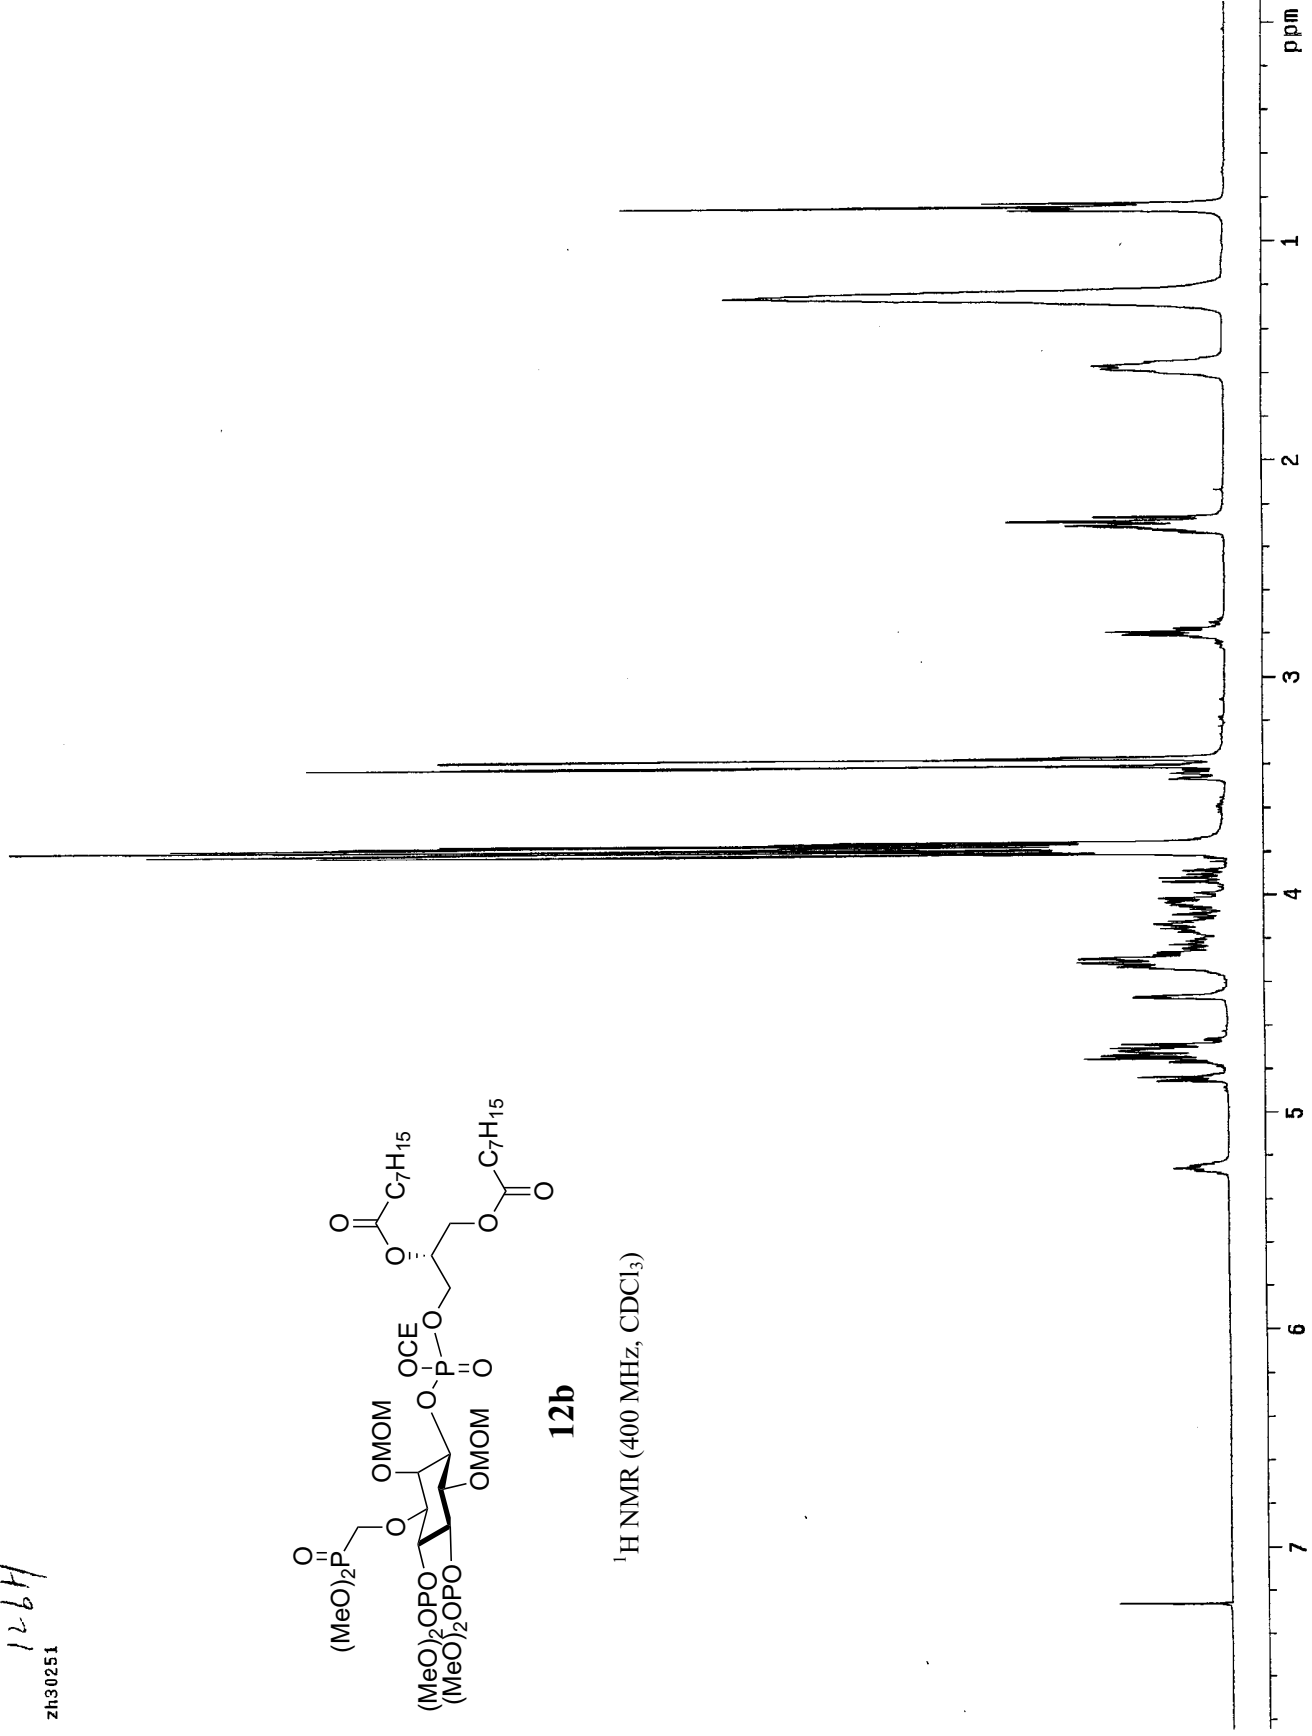

rbp

zh30251P

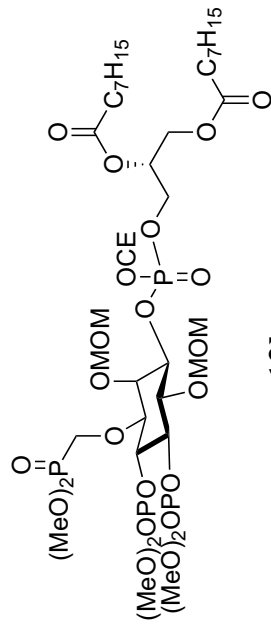

**12b**

$^3\text{P}$  NMR (162 MHz,  $\text{CDCl}_3$ )

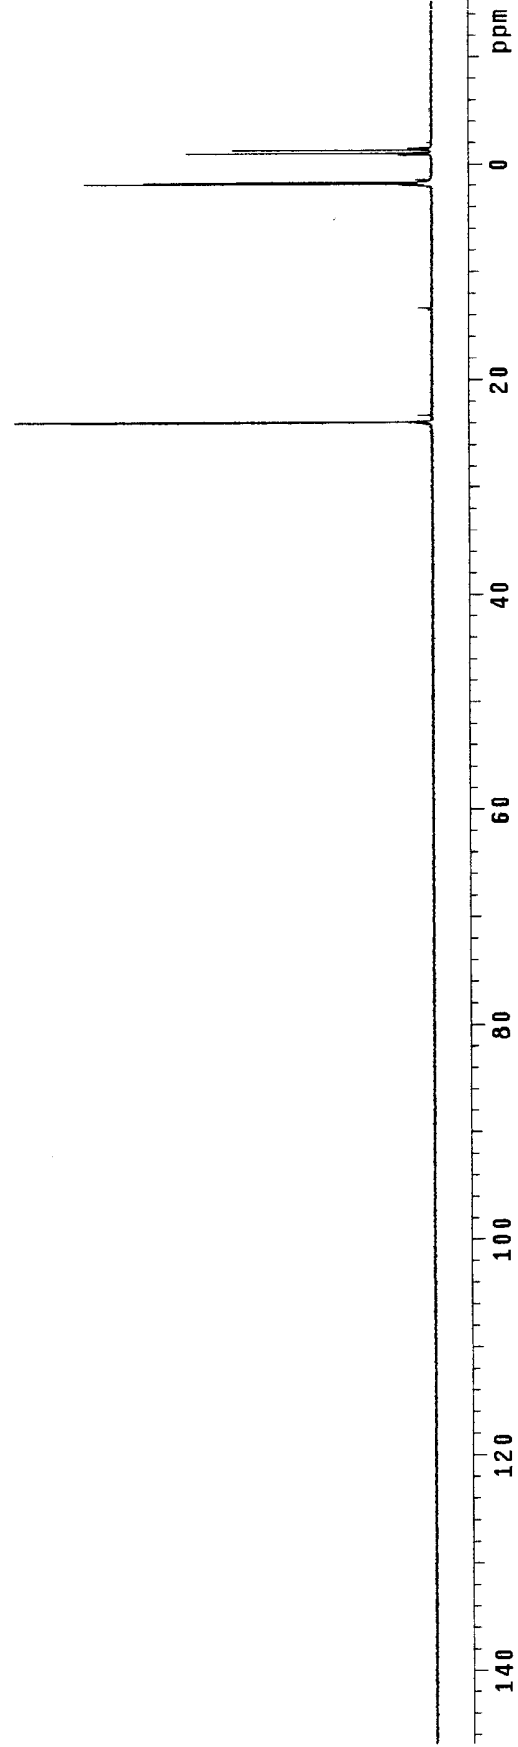

126c

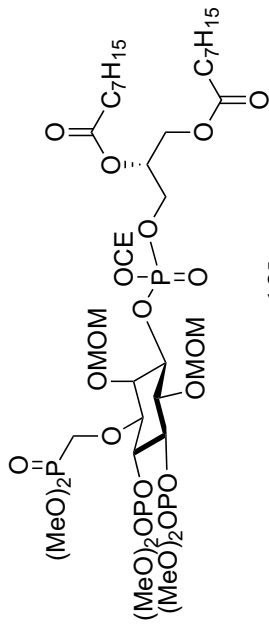

**12b**

<sup>13</sup>C NMR (101 MHz, CDCl<sub>3</sub>)

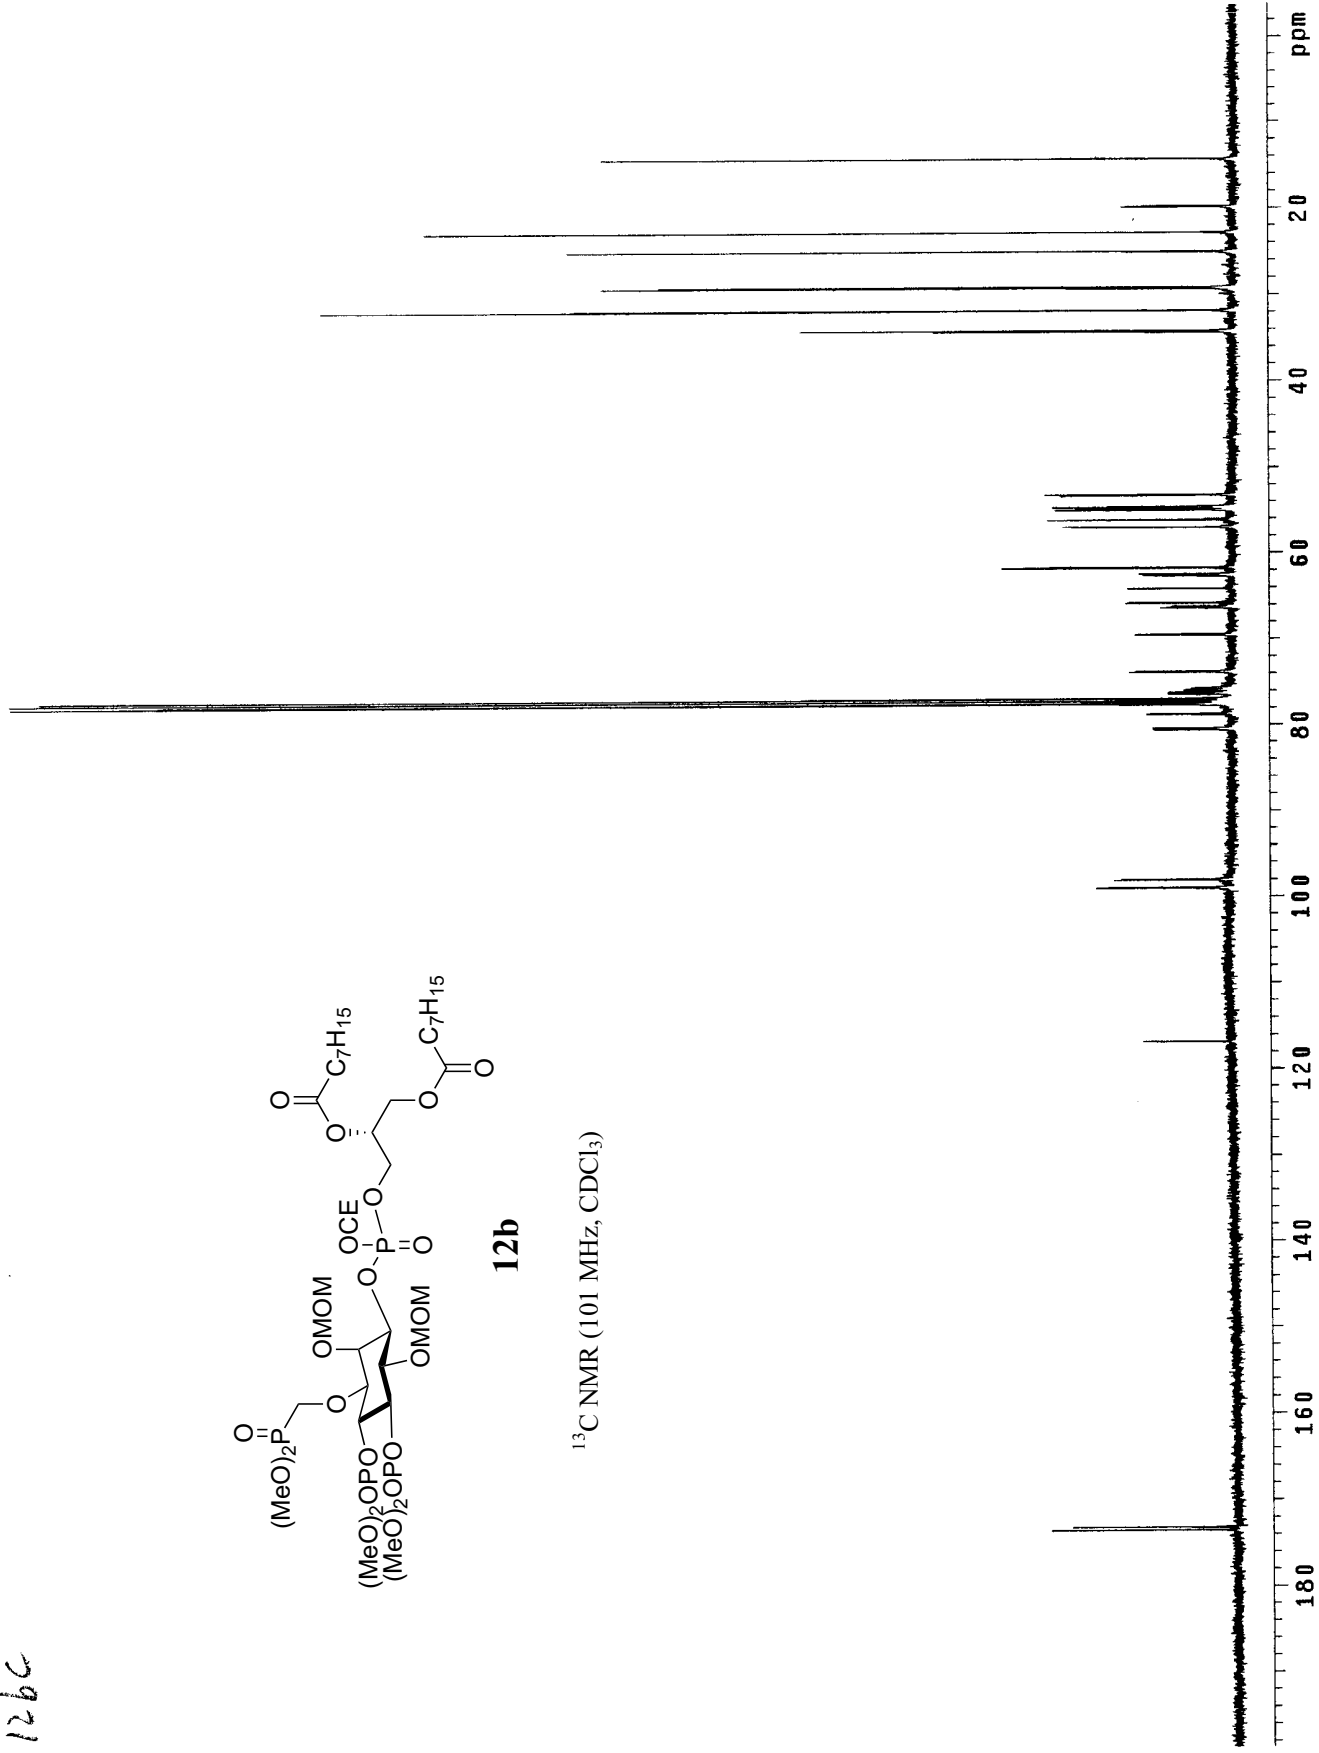



PCP

ZH3027 IP

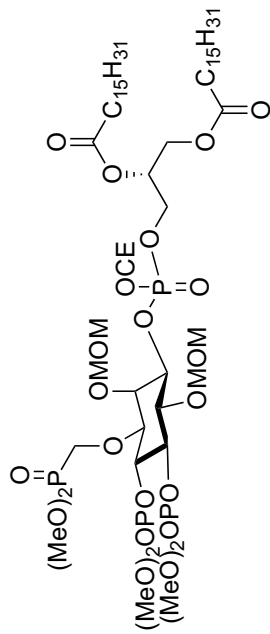

**12c**

$^{31}\text{P}$  NMR (162 MHz,  $\text{CDCl}_3$ )

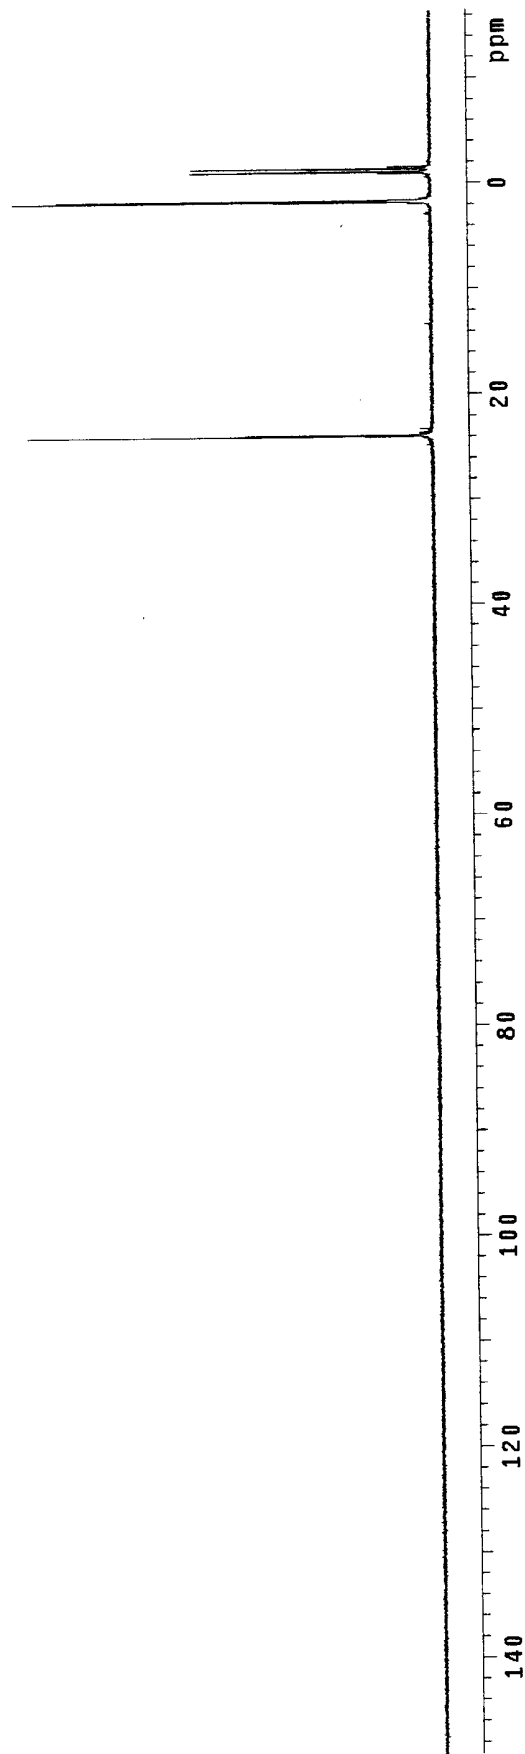

12c

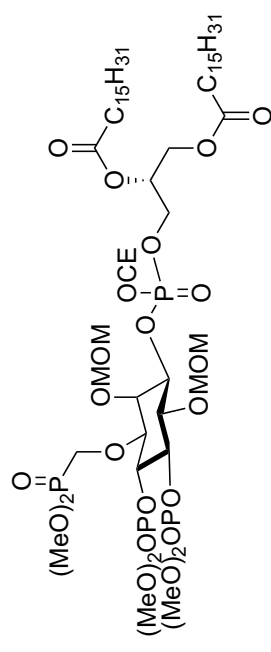

**12c**

<sup>13</sup>C NMR (101 MHz, CDCl<sub>3</sub>)

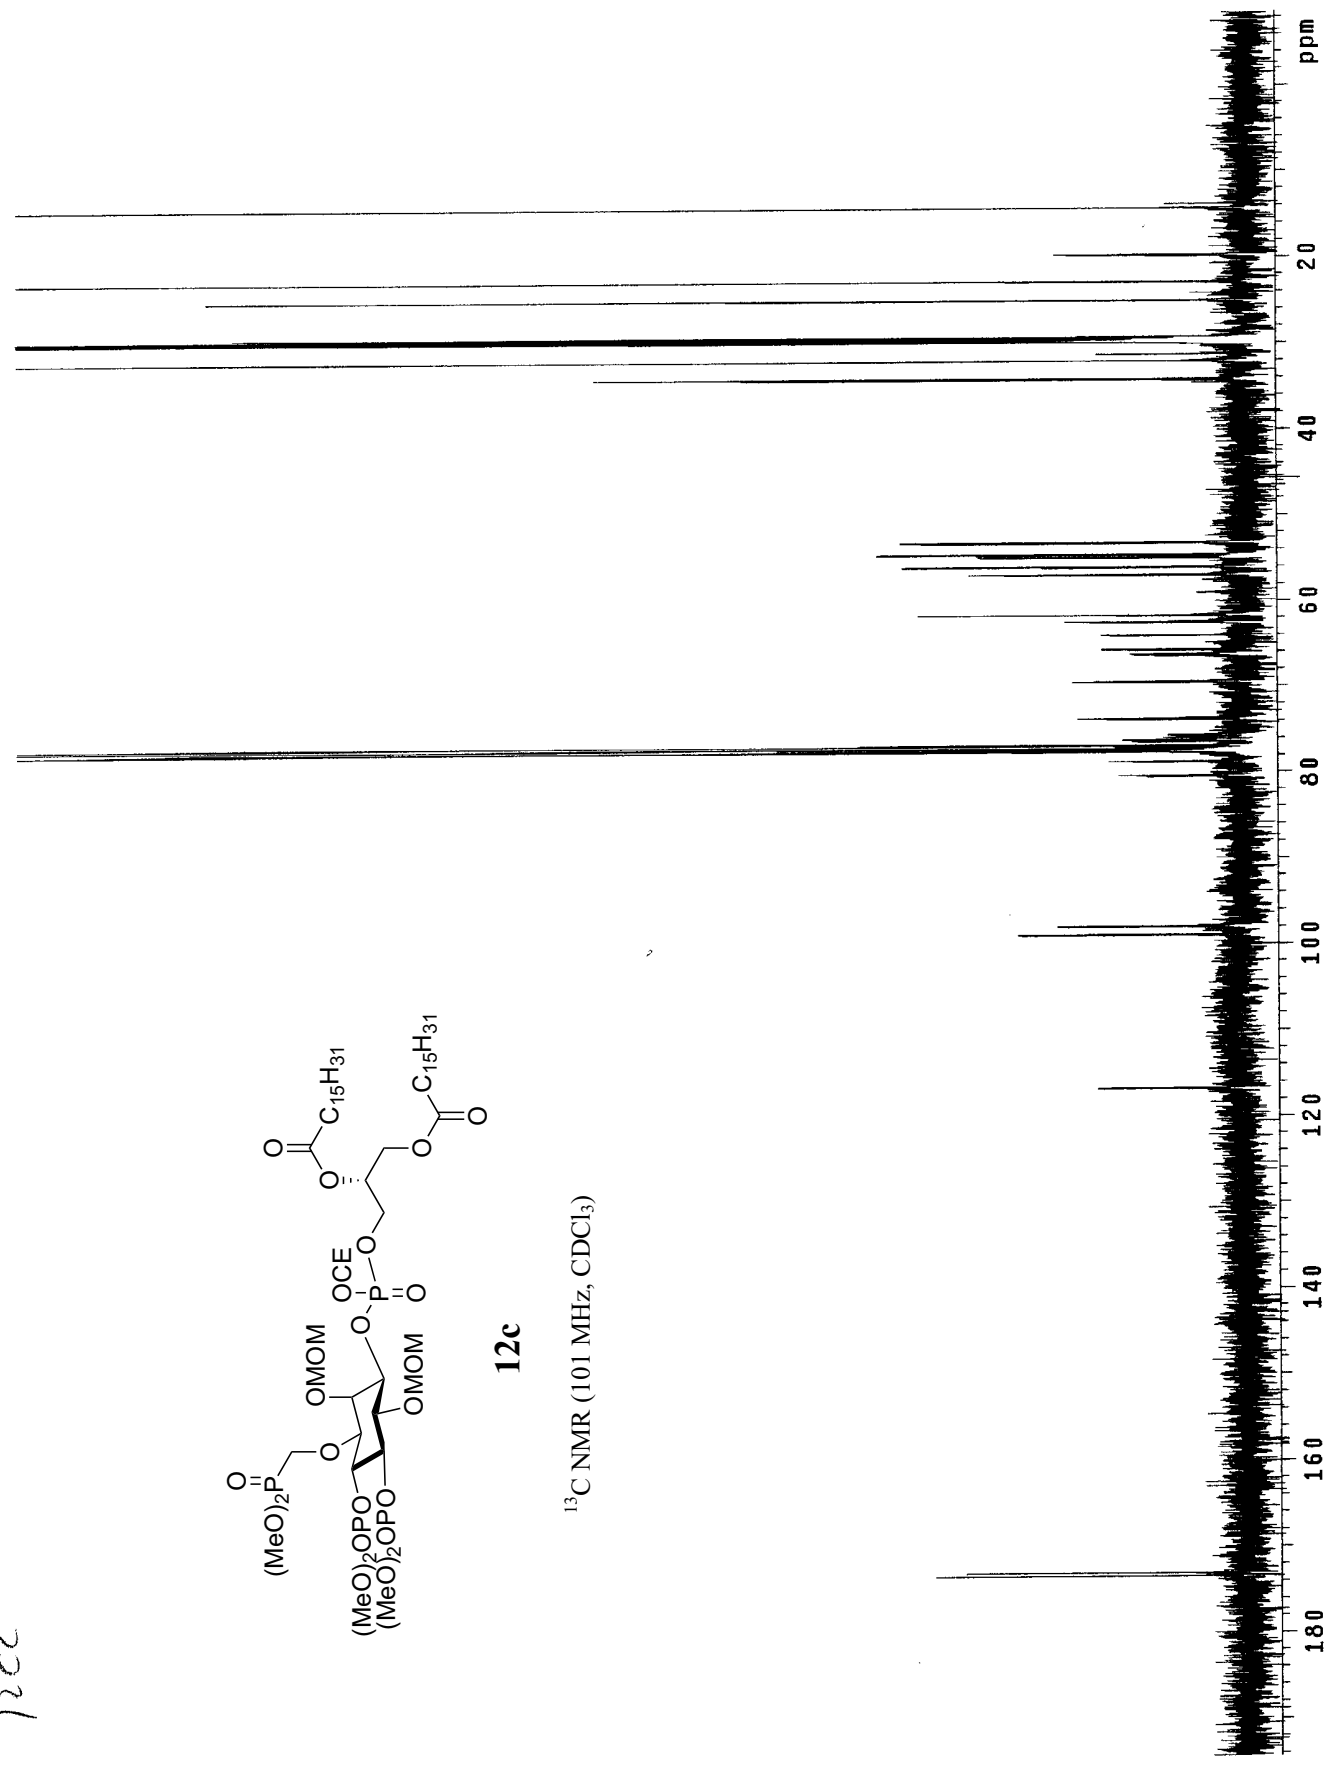

pdf

ZH30291

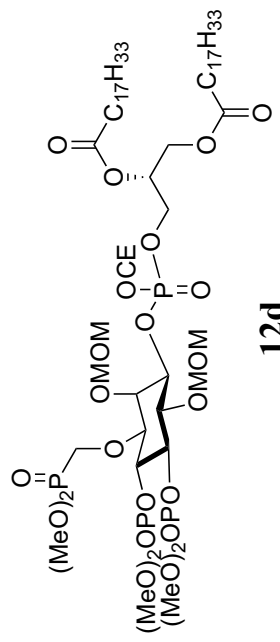

12d

<sup>1</sup>H NMR (400 MHz, CDCl<sub>3</sub>)

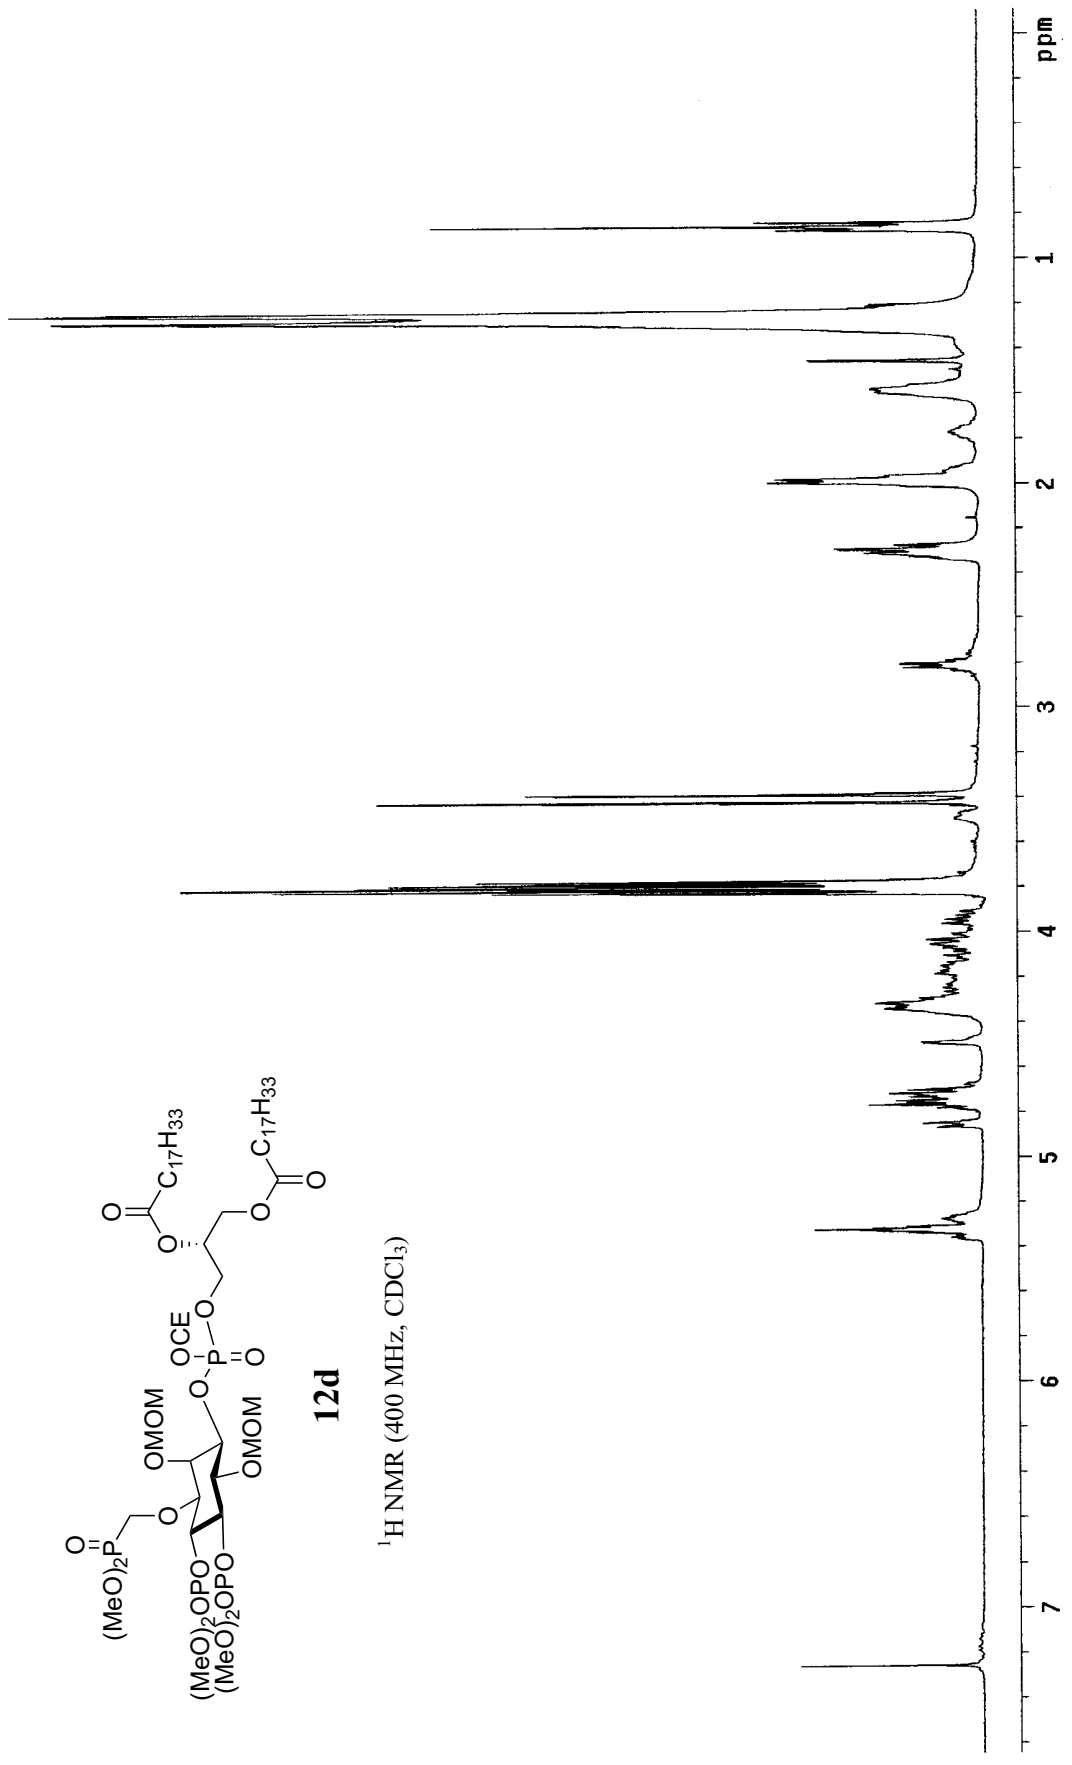

12d

ZH30291P

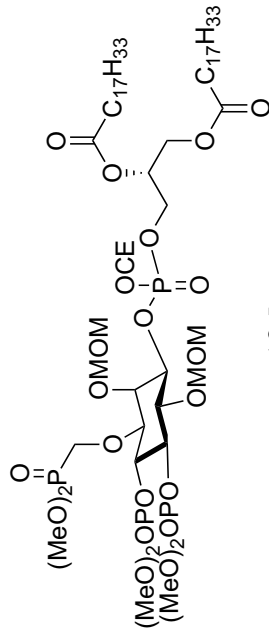

**12d**

<sup>31</sup>P NMR (162 MHz, CDCl<sub>3</sub>)

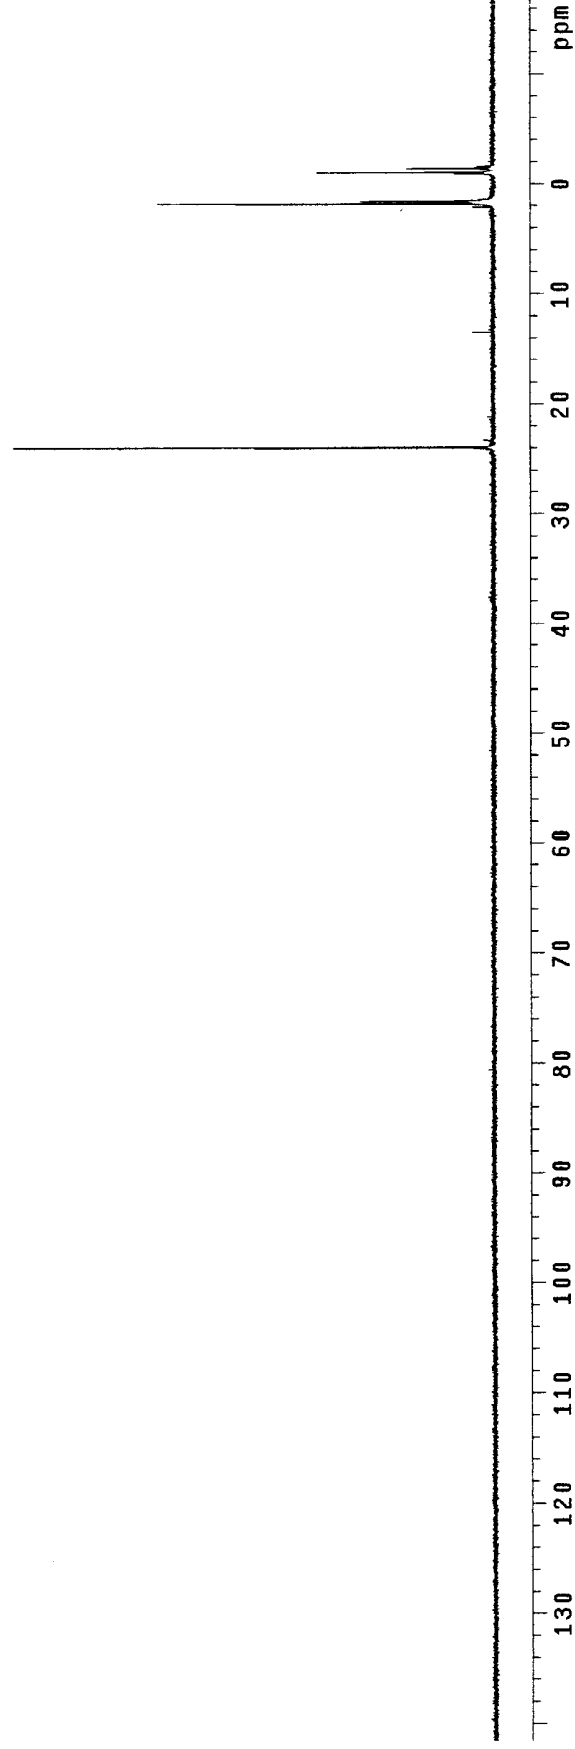



12dc

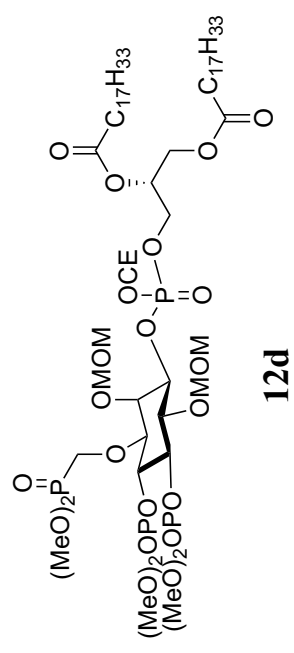

**12d**

<sup>13</sup>C NMR (101 MHz, CDCl<sub>3</sub>)

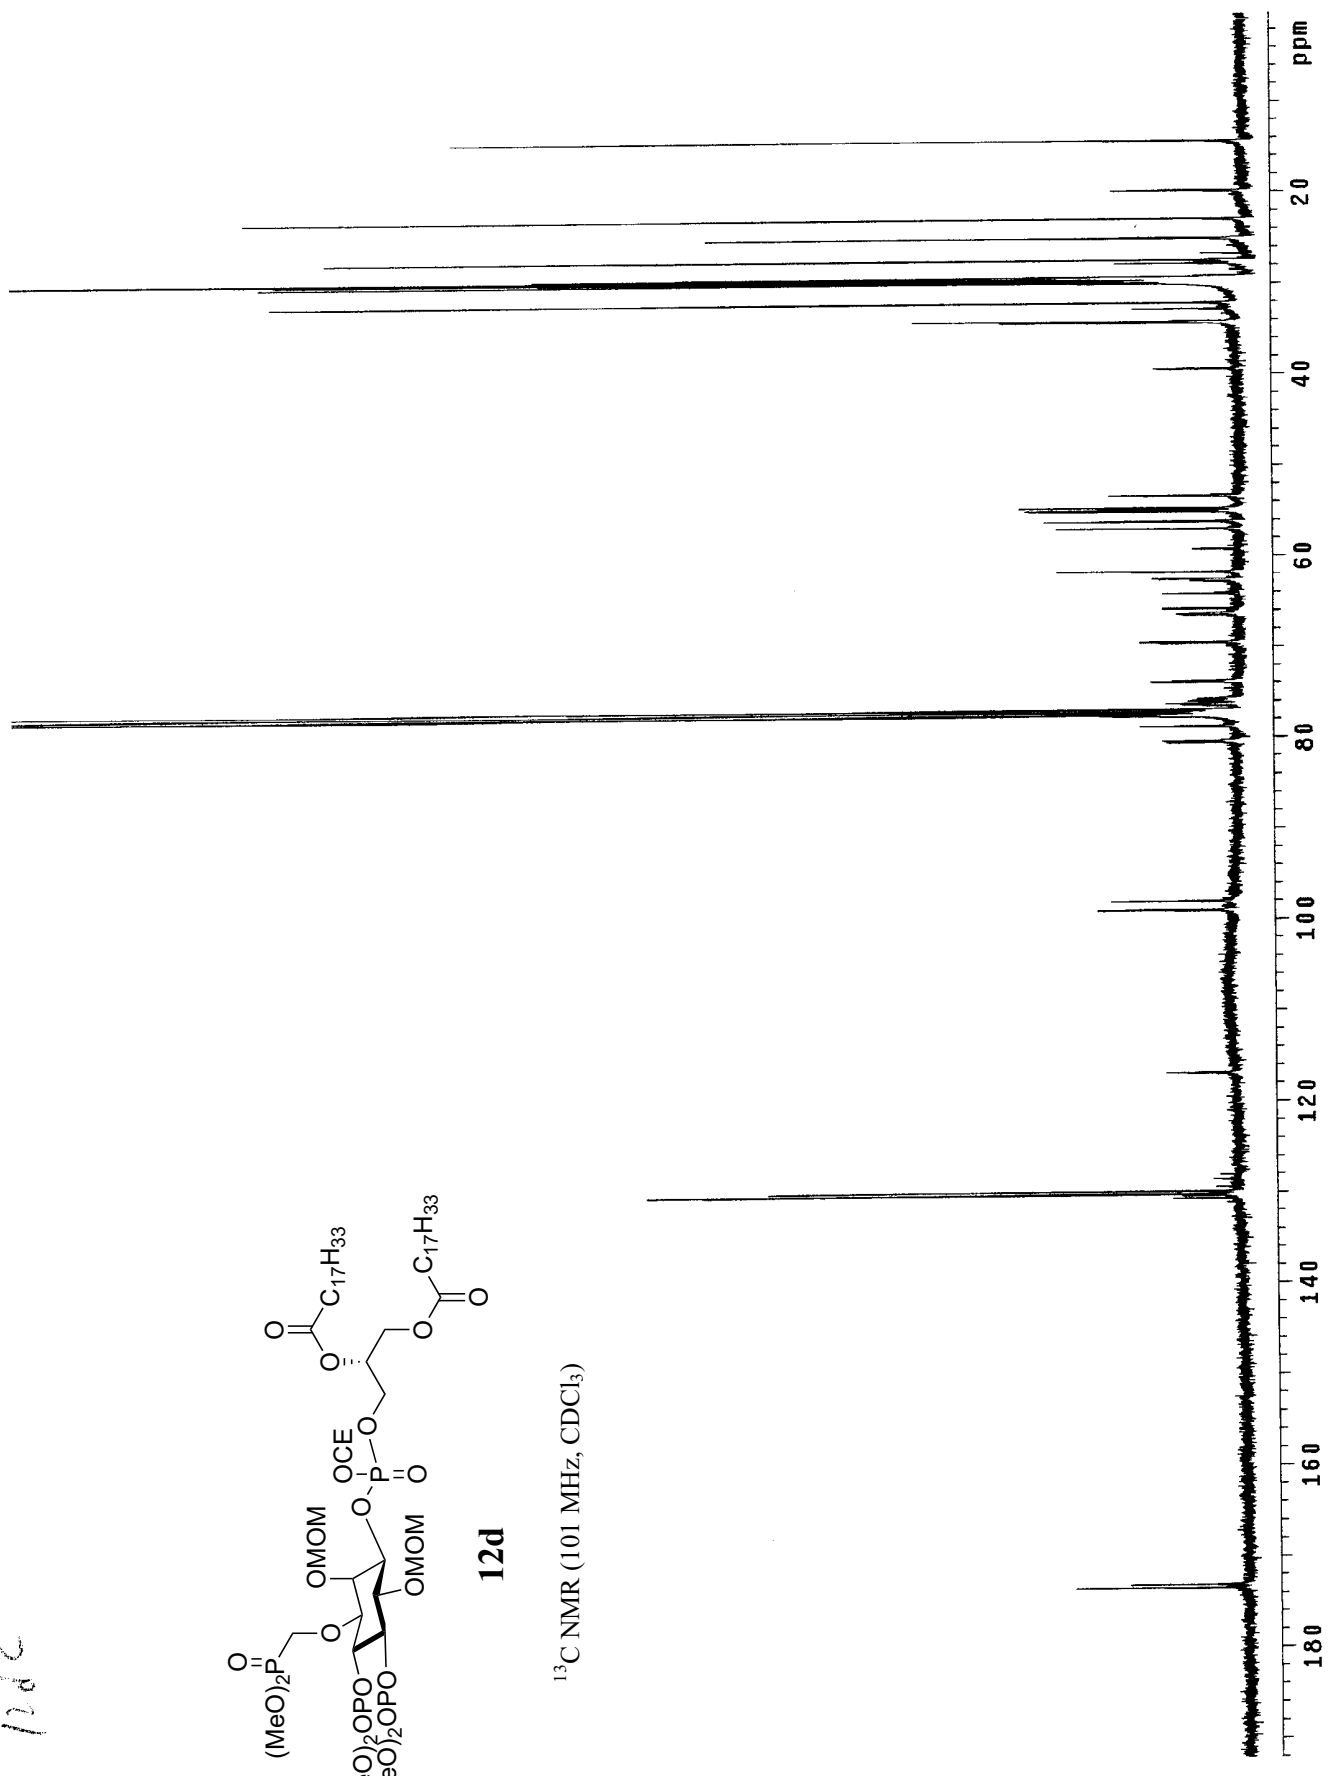

2aH

Zh30241  
CD300

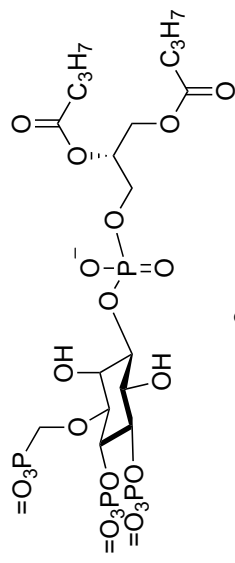

2a

<sup>1</sup>H NMR (400 MHz, CD<sub>3</sub>OD)

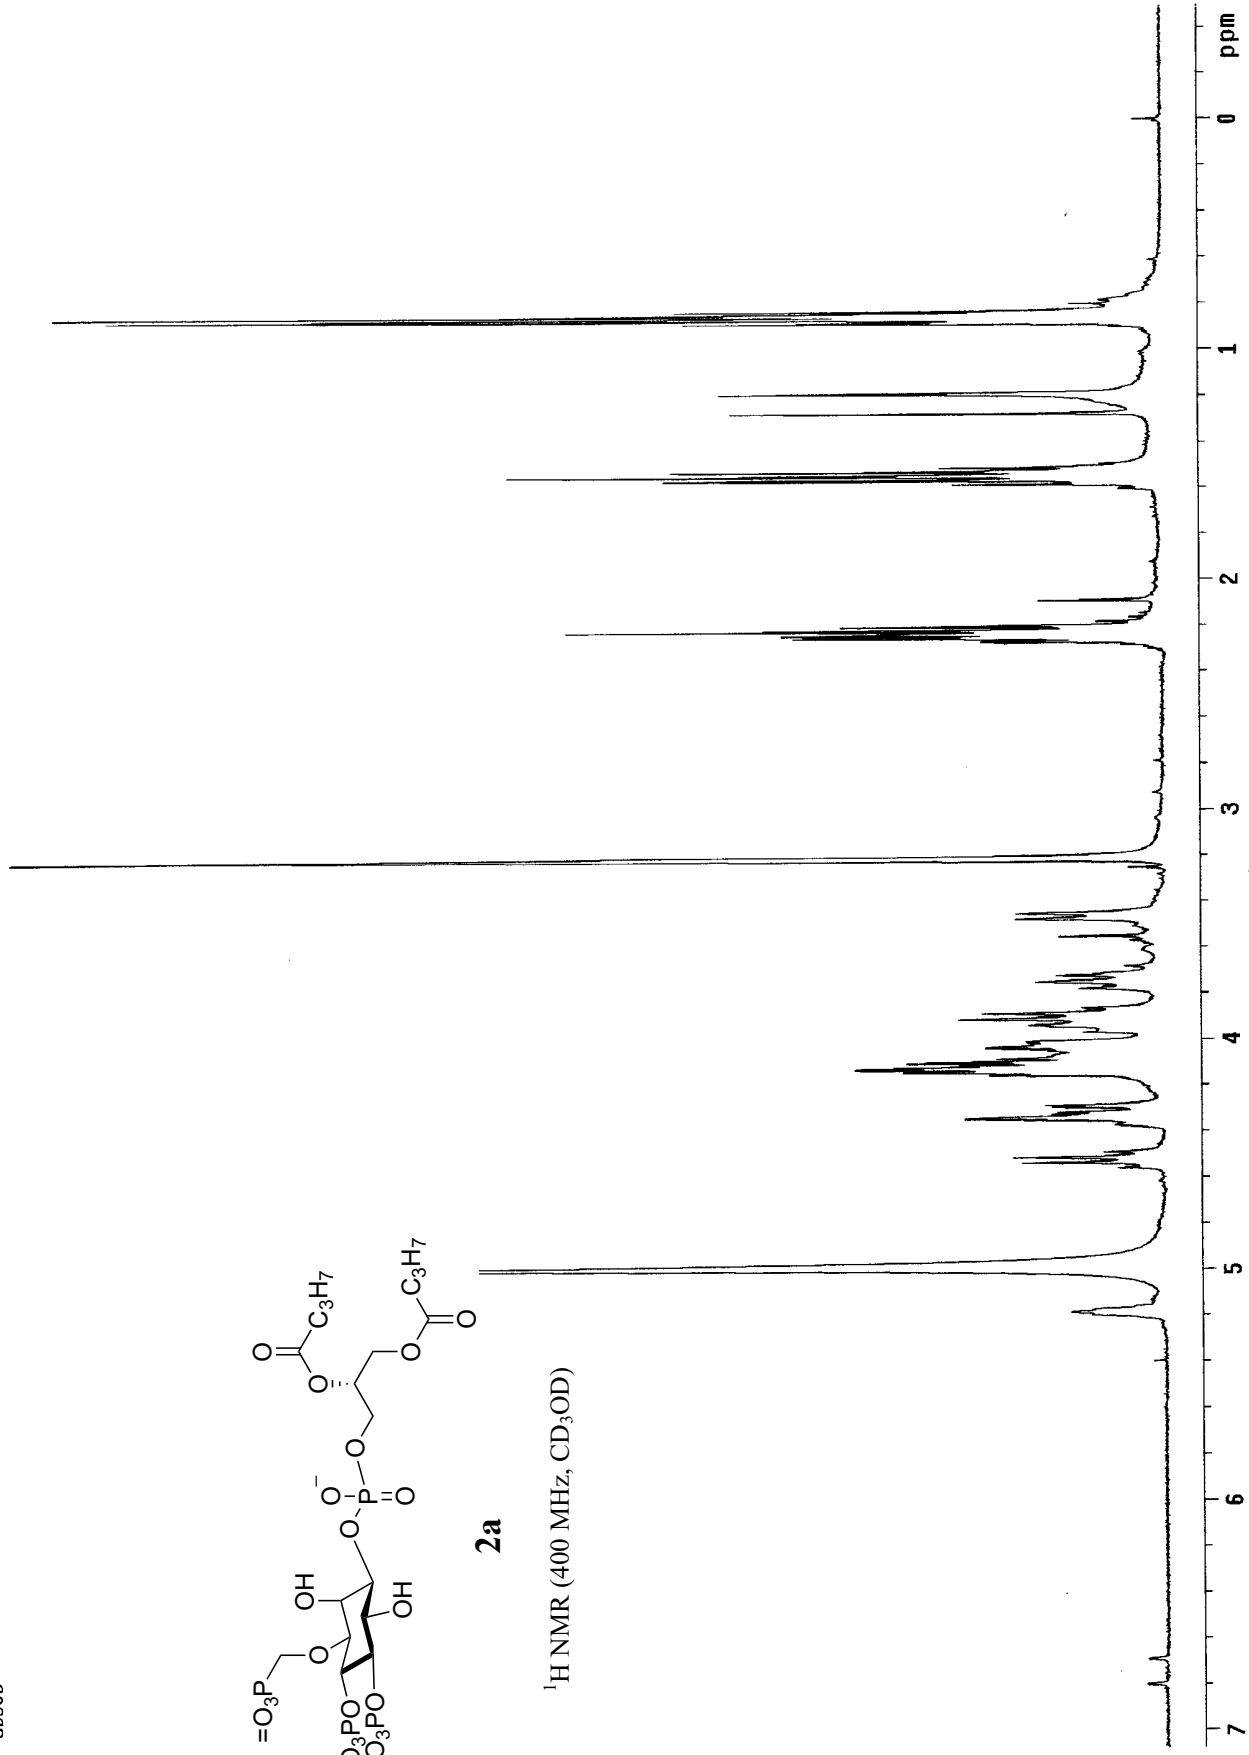

zap

Zh30241P  
CD300

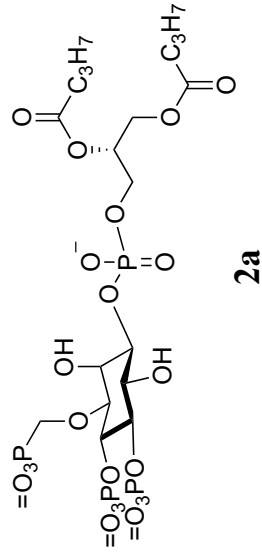

$^{31}\text{P}$  NMR (162 MHz,  $\text{CD}_3\text{OD}$ )

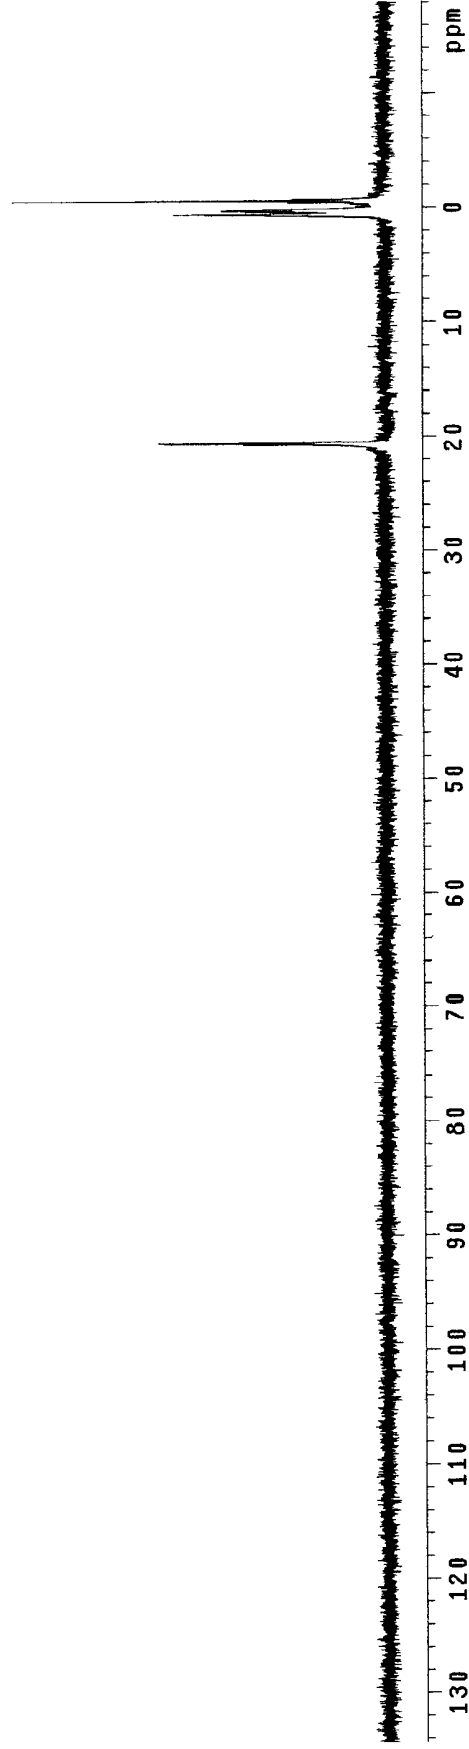

7aC

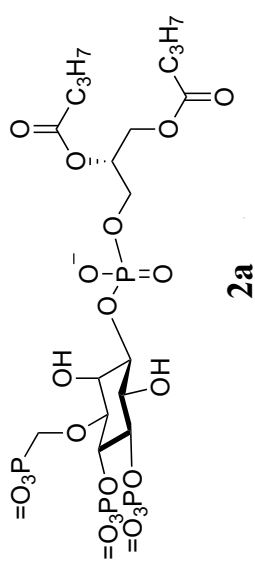

<sup>13</sup>C NMR (101 MHz, CD<sub>3</sub>OD)

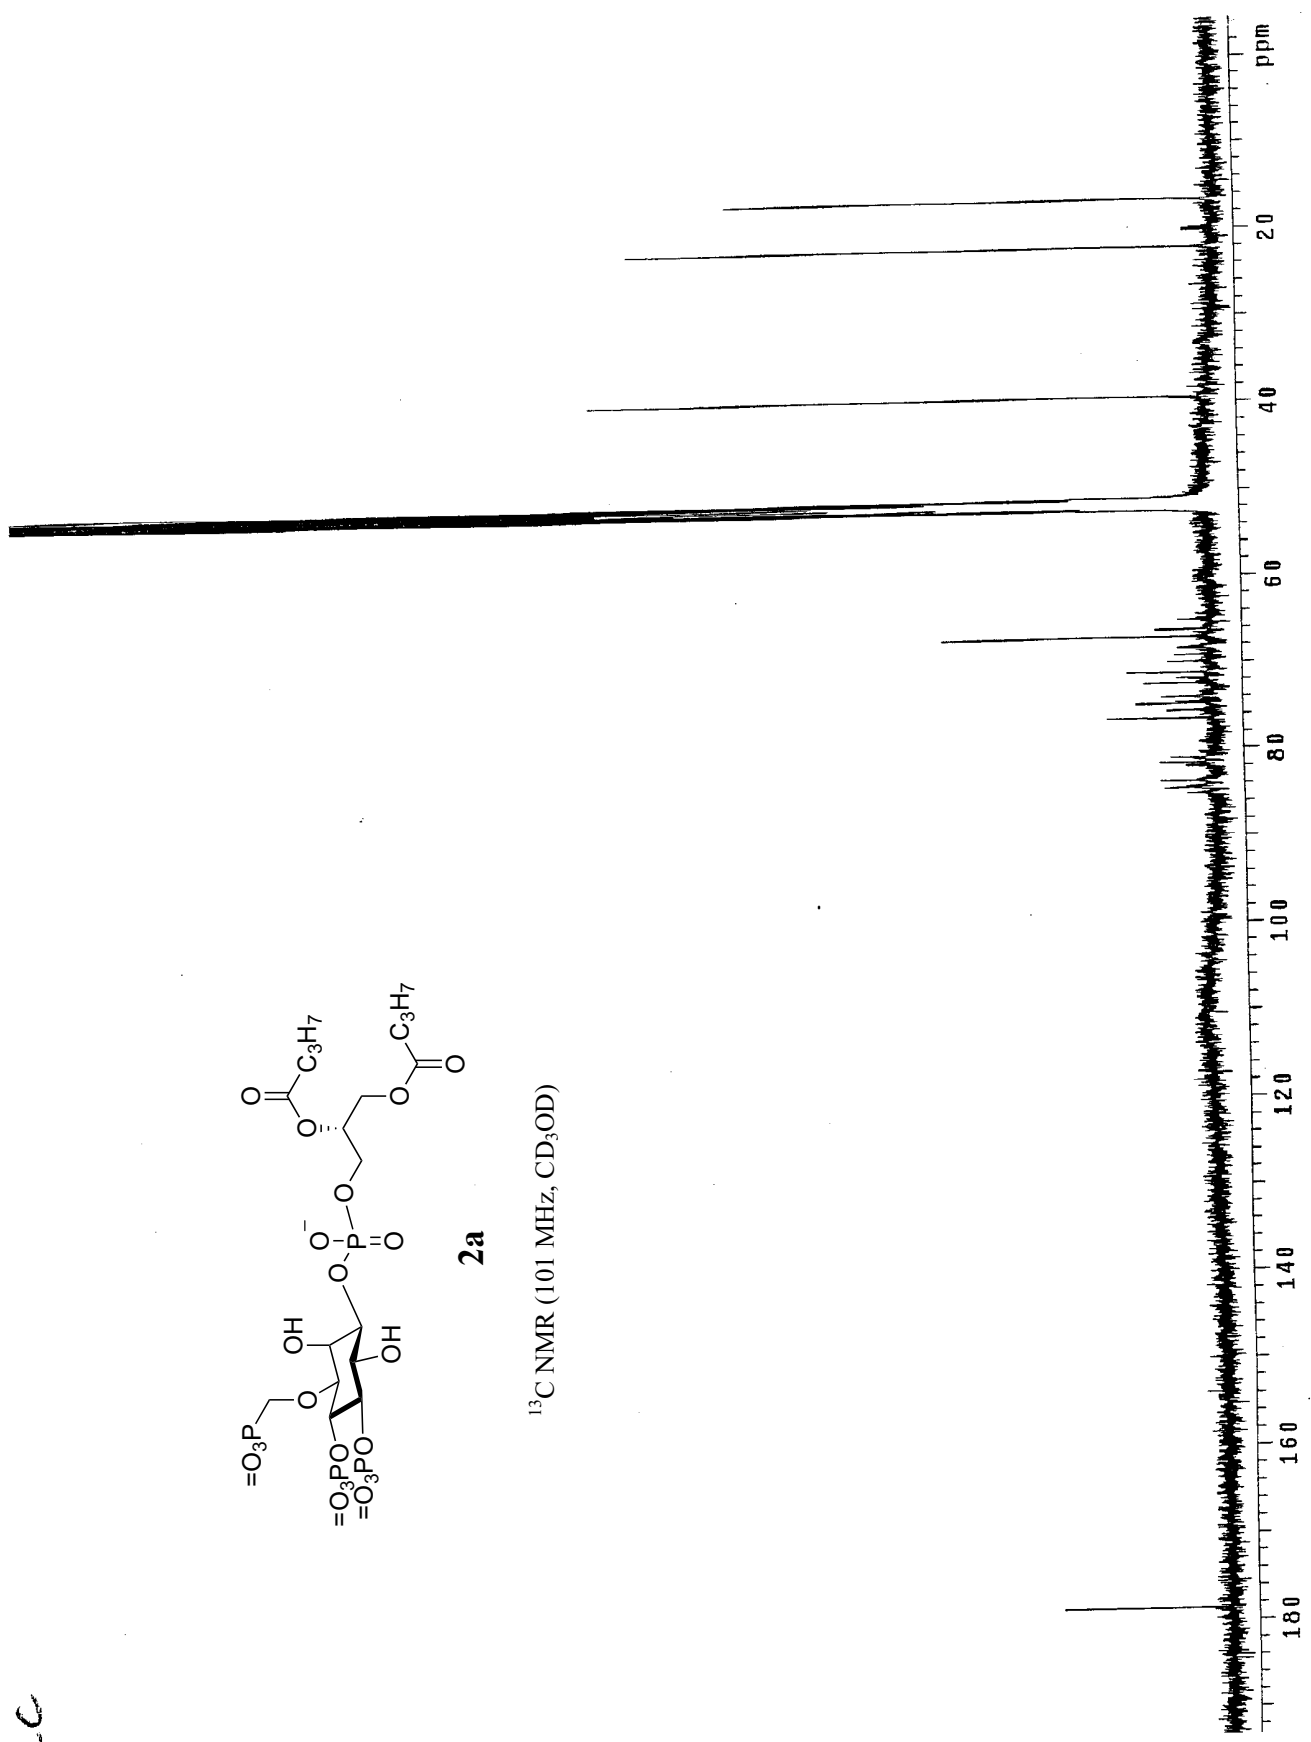

2bH

Zh30261  
CD300

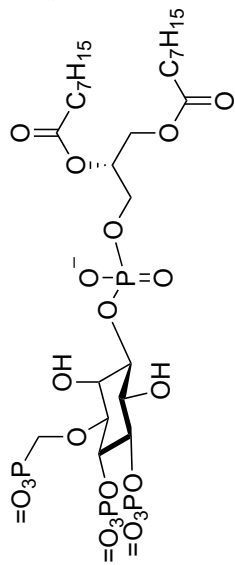

2b

<sup>1</sup>H NMR (400 MHz, CD<sub>3</sub>OD)

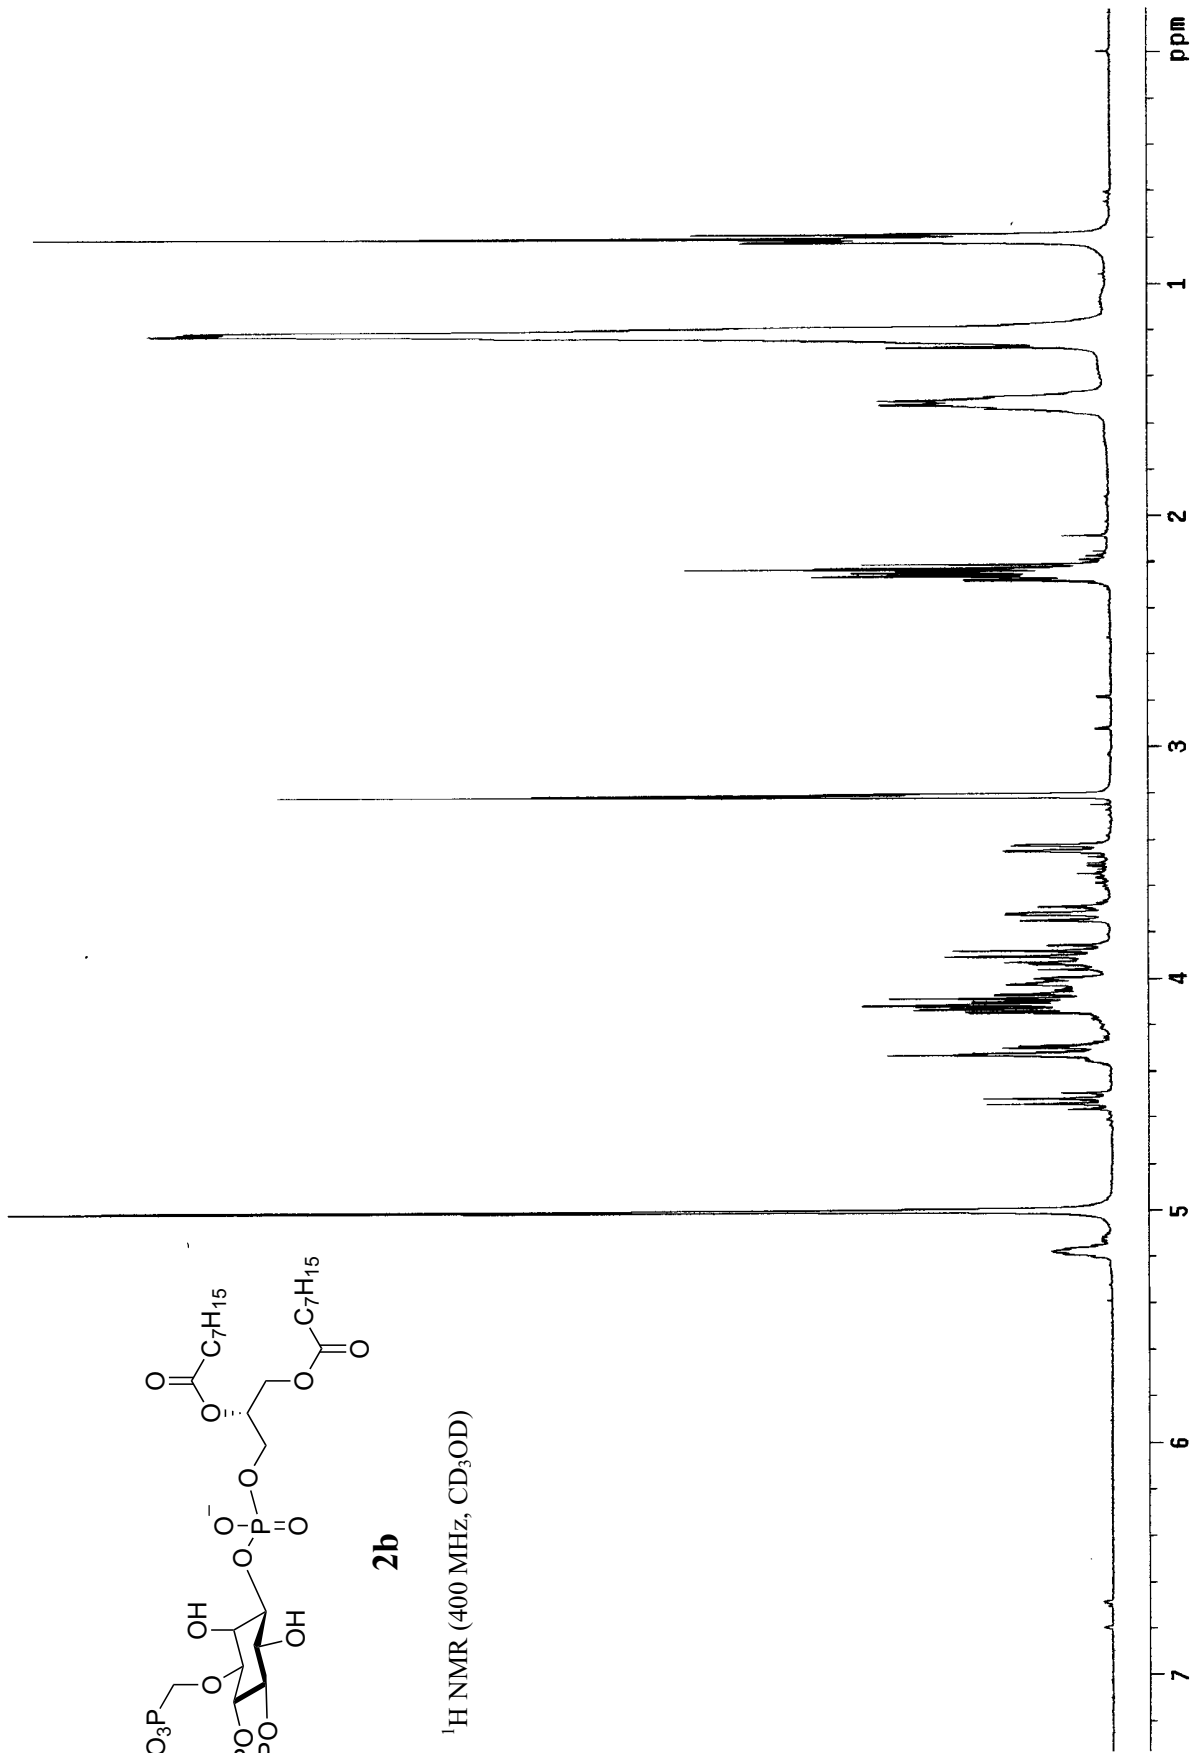

26P

ZH30261P

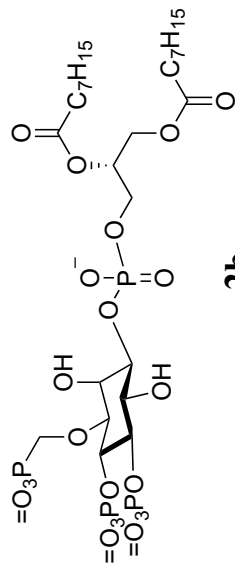

**2b**

<sup>31</sup>P NMR (162 MHz, CD<sub>3</sub>OD)

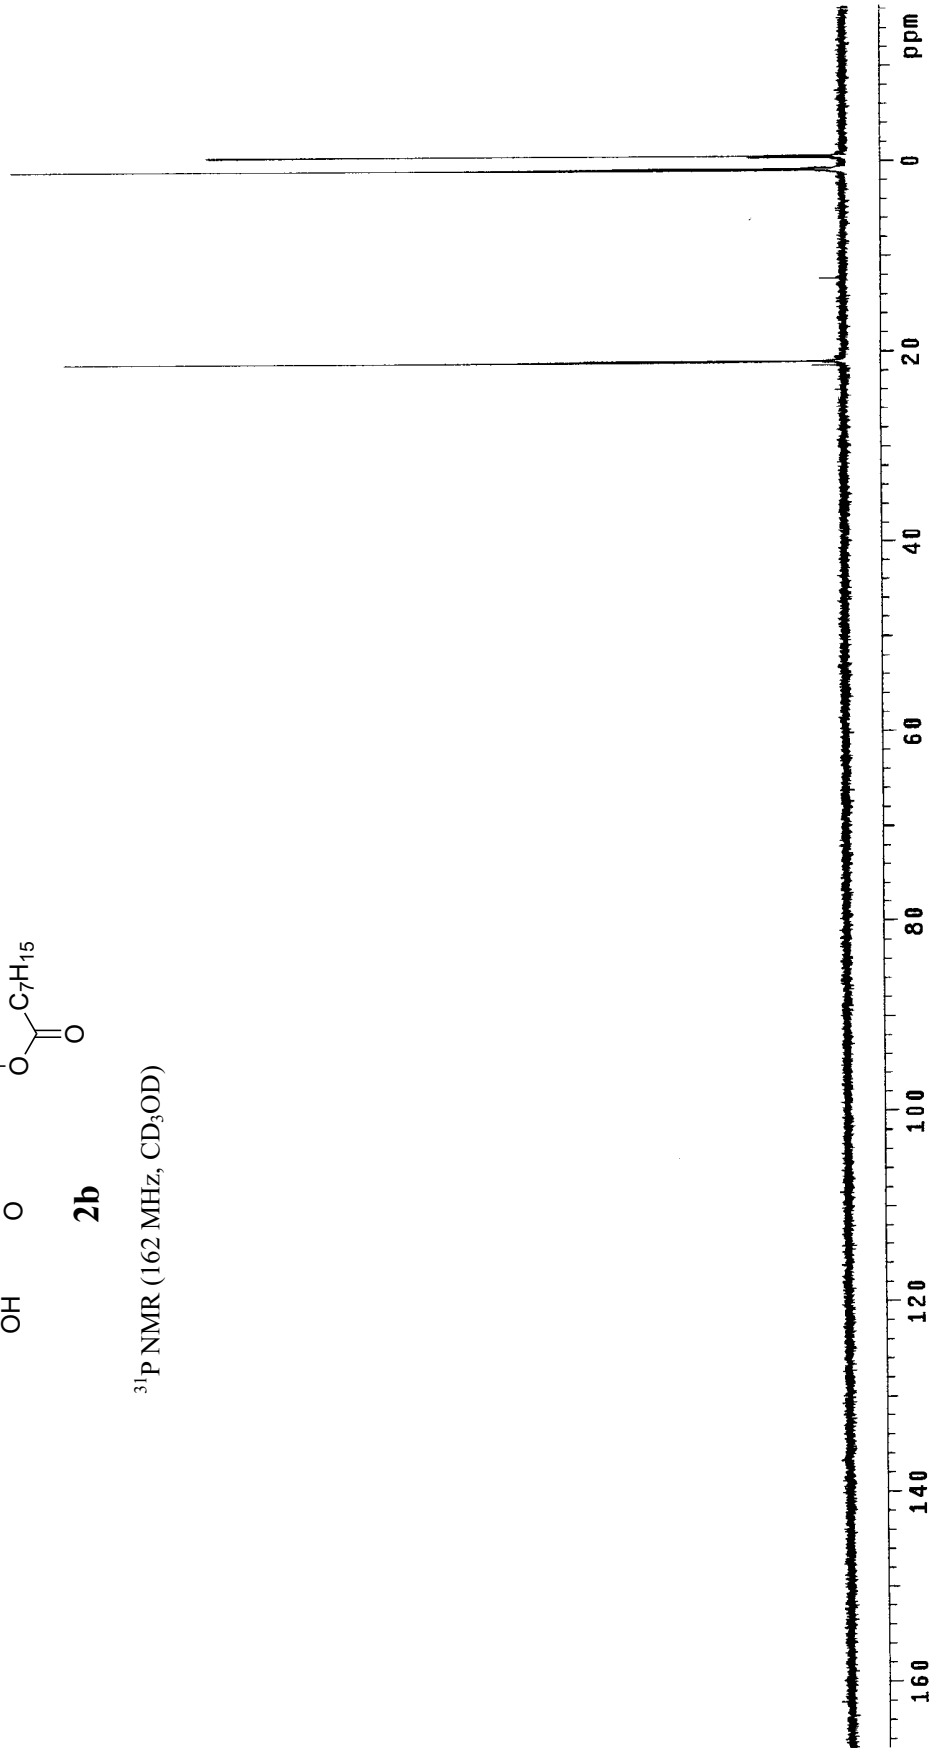

2b

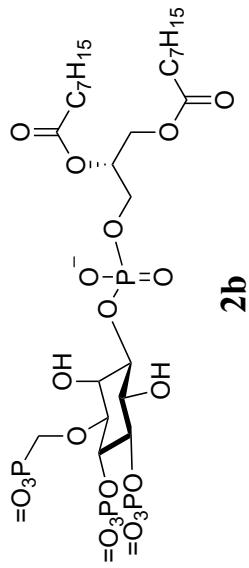

<sup>13</sup>C NMR (101 MHz, CD<sub>3</sub>OD)

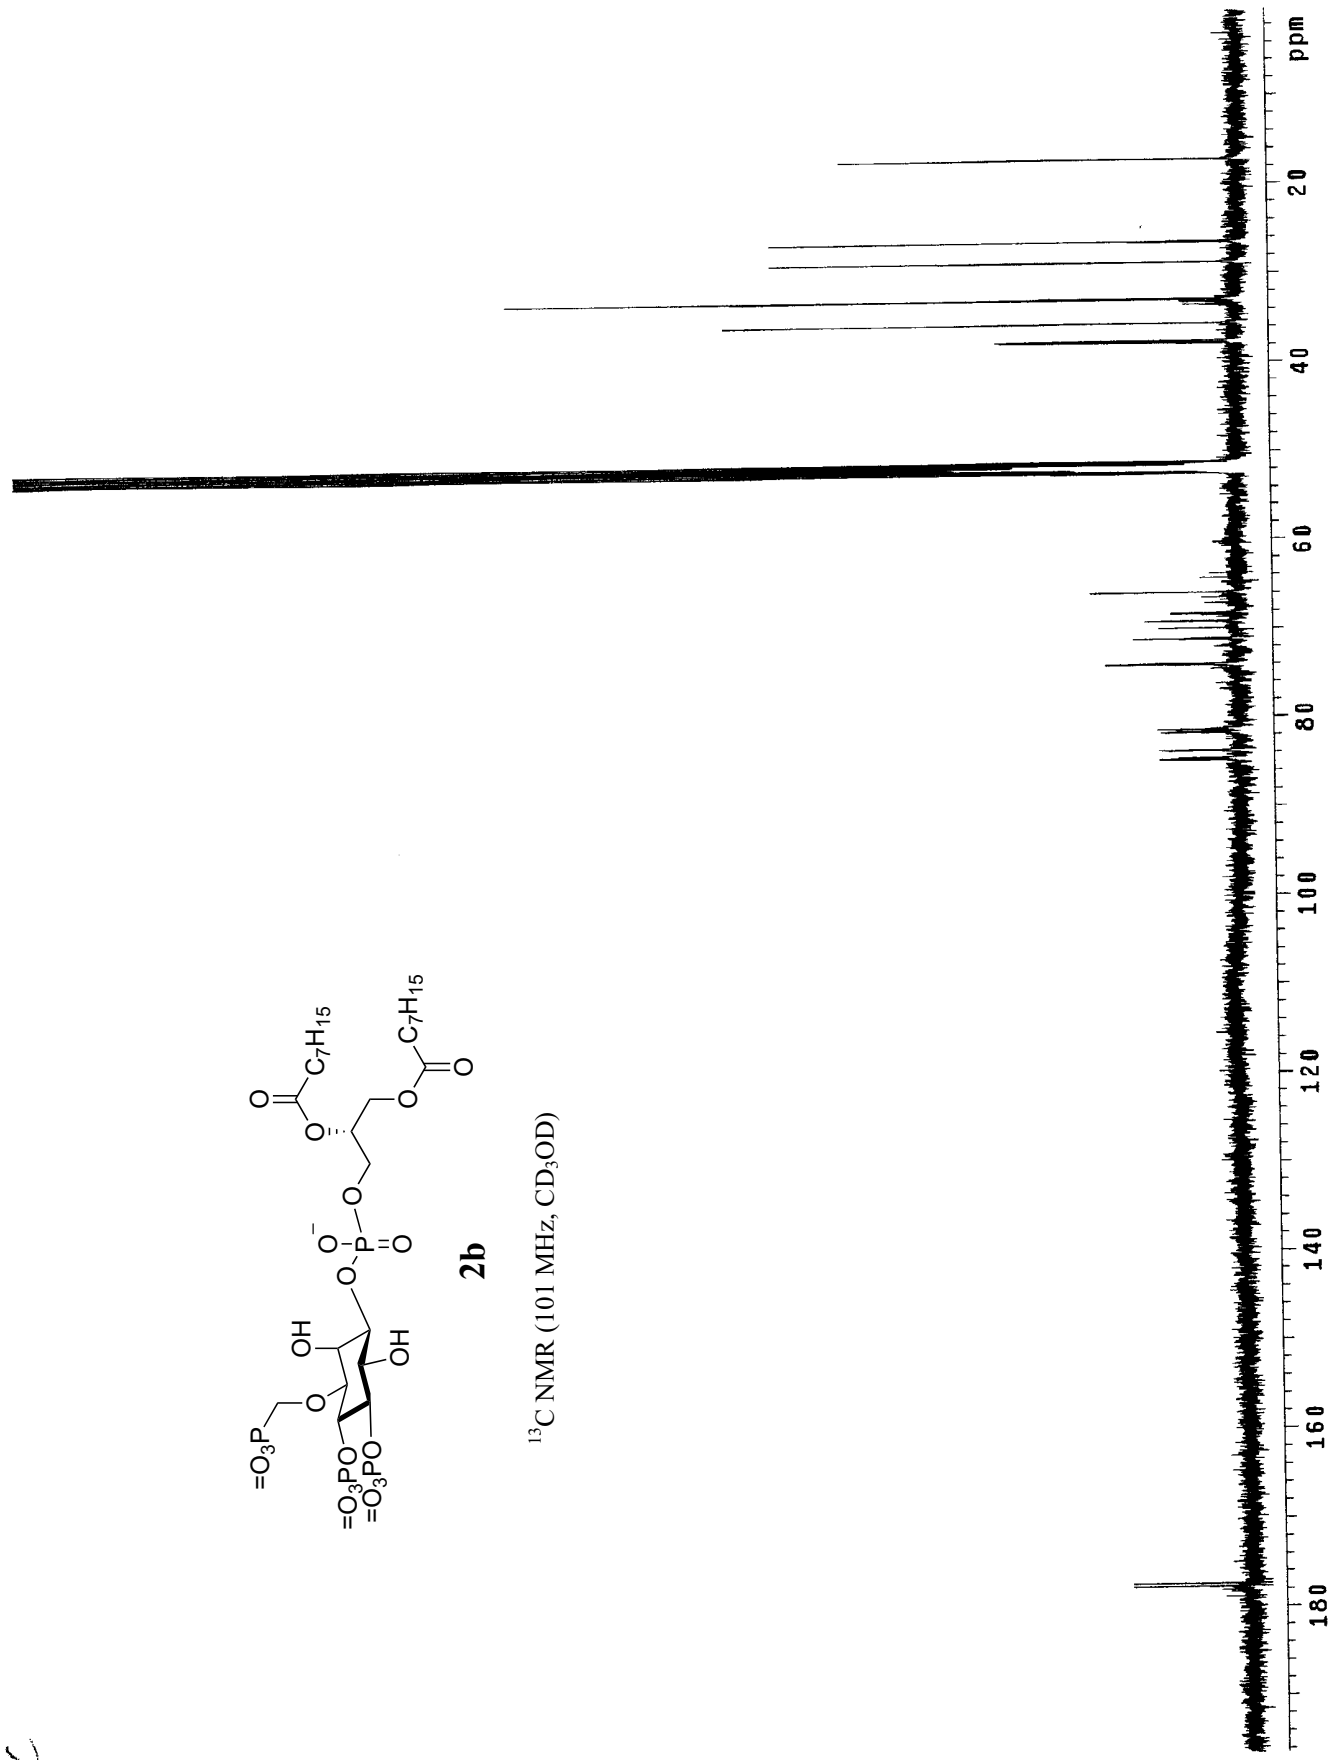

ZCH

Zh30281  
CD3OD/CDC13 3:1

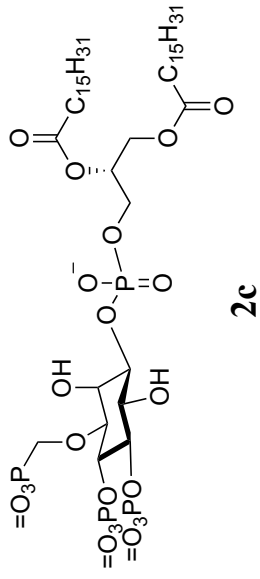

<sup>1</sup>H NMR (400 MHz, CD<sub>3</sub>OD/CDCl<sub>3</sub> = 3:1)

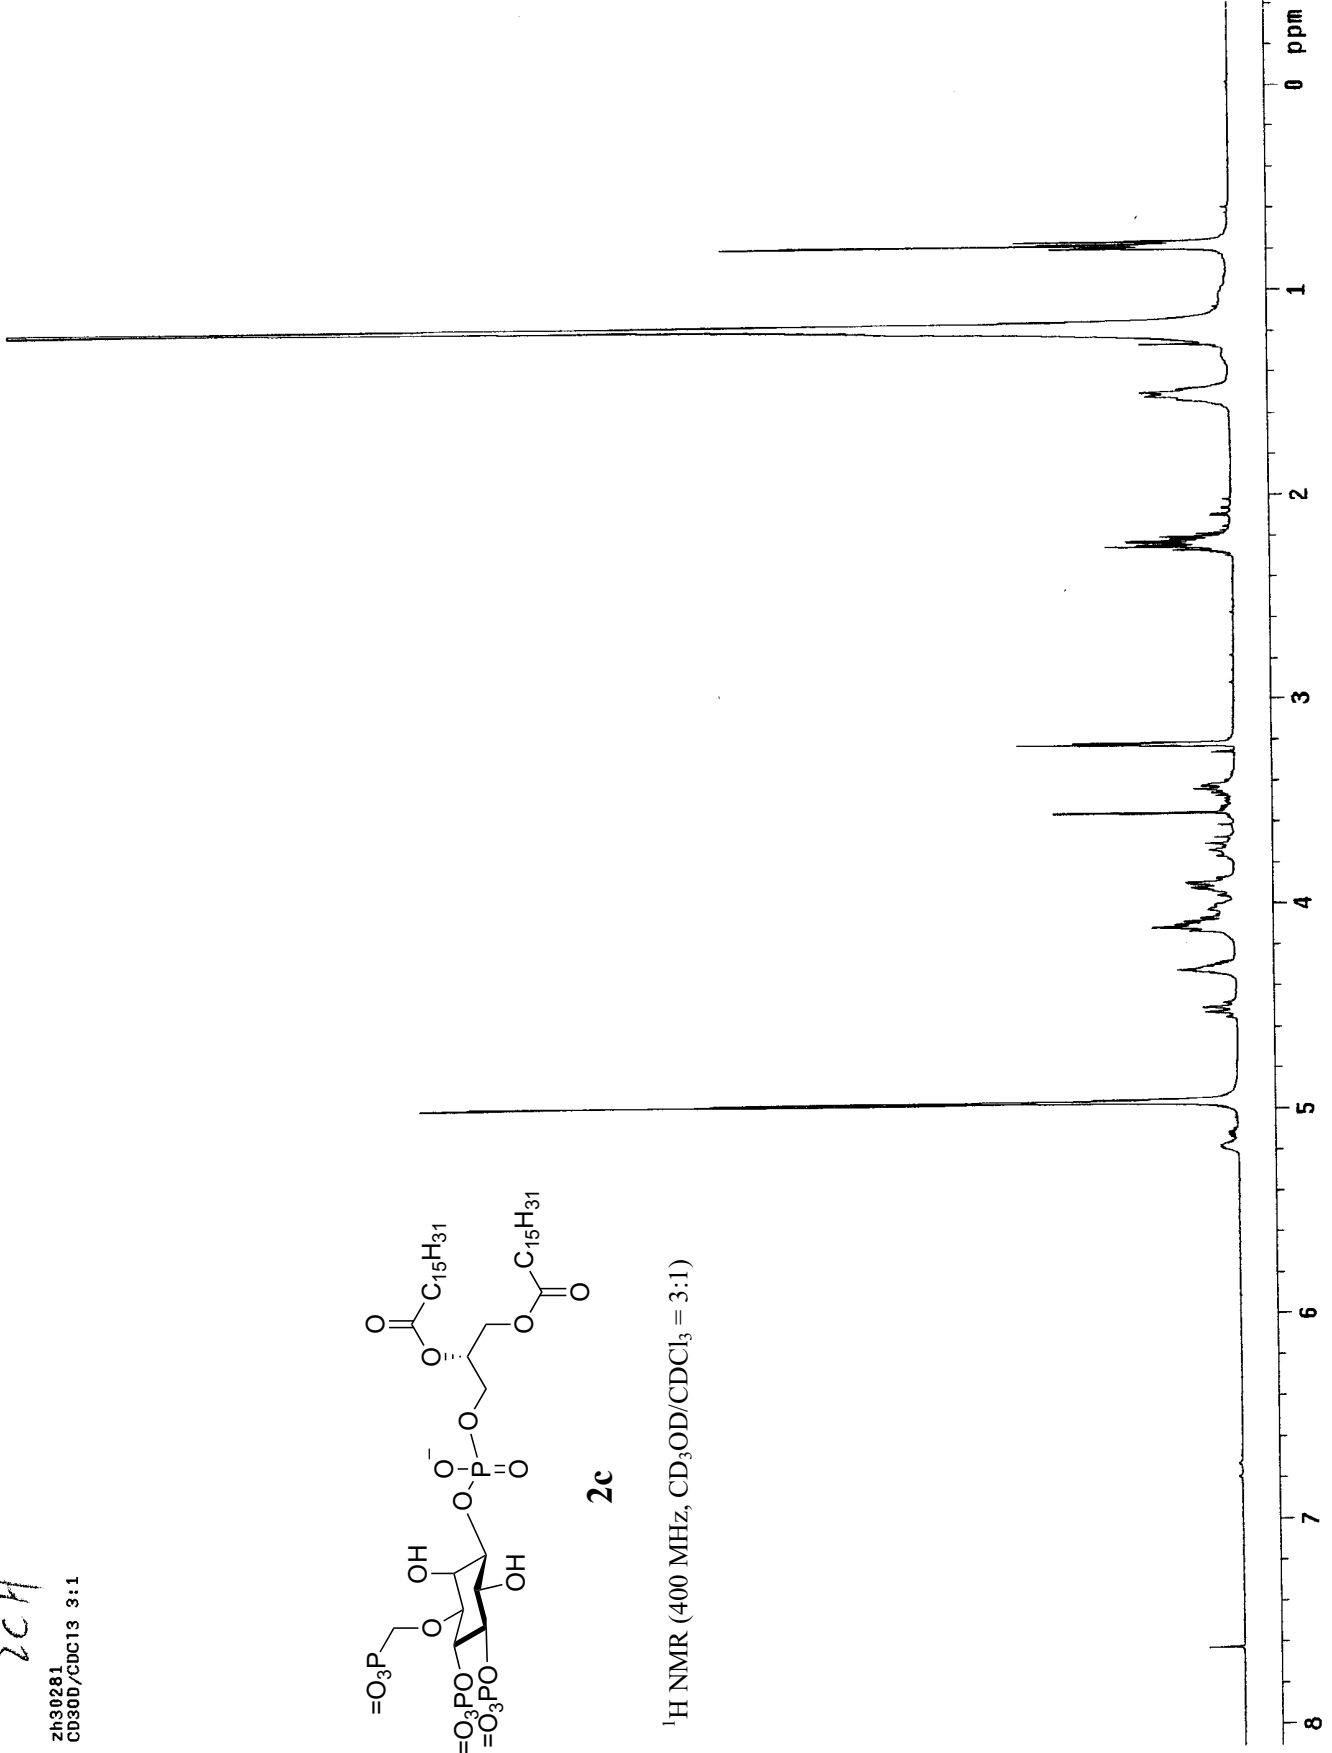



2cP

zh30281P  
CD300/CDC13 3:1

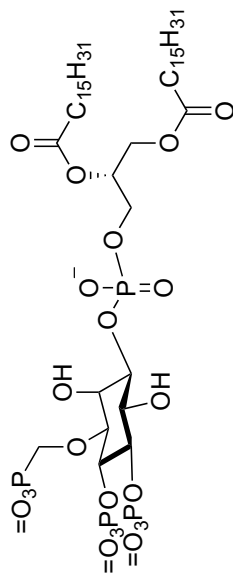

2c

$^{13}\text{C}$  NMR (101 MHz,  $\text{CD}_3\text{OD}/\text{CDCl}_3 = 3:1$ )

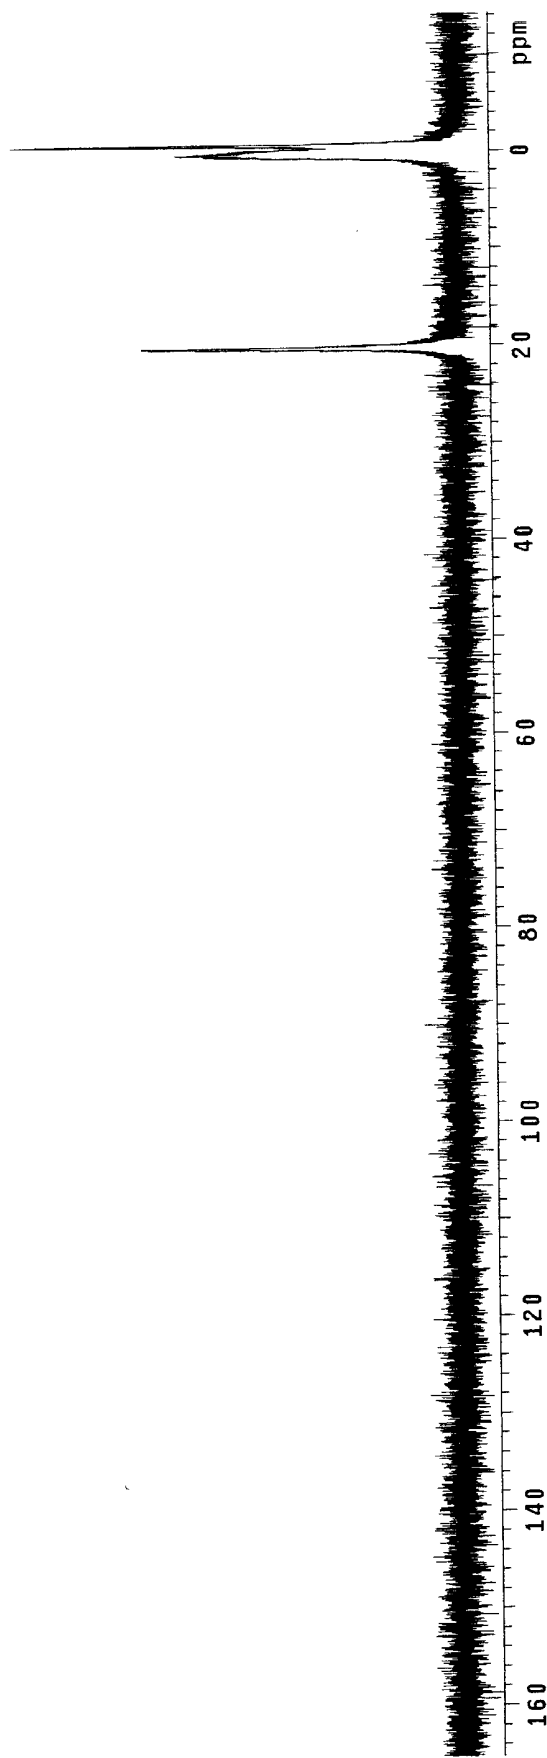



2dH  
zh30301  
CD30D

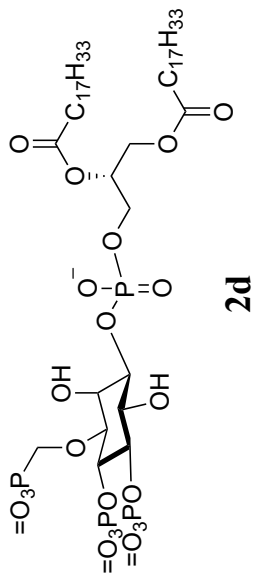

<sup>1</sup>H NMR (400 MHz, CD<sub>3</sub>OD)

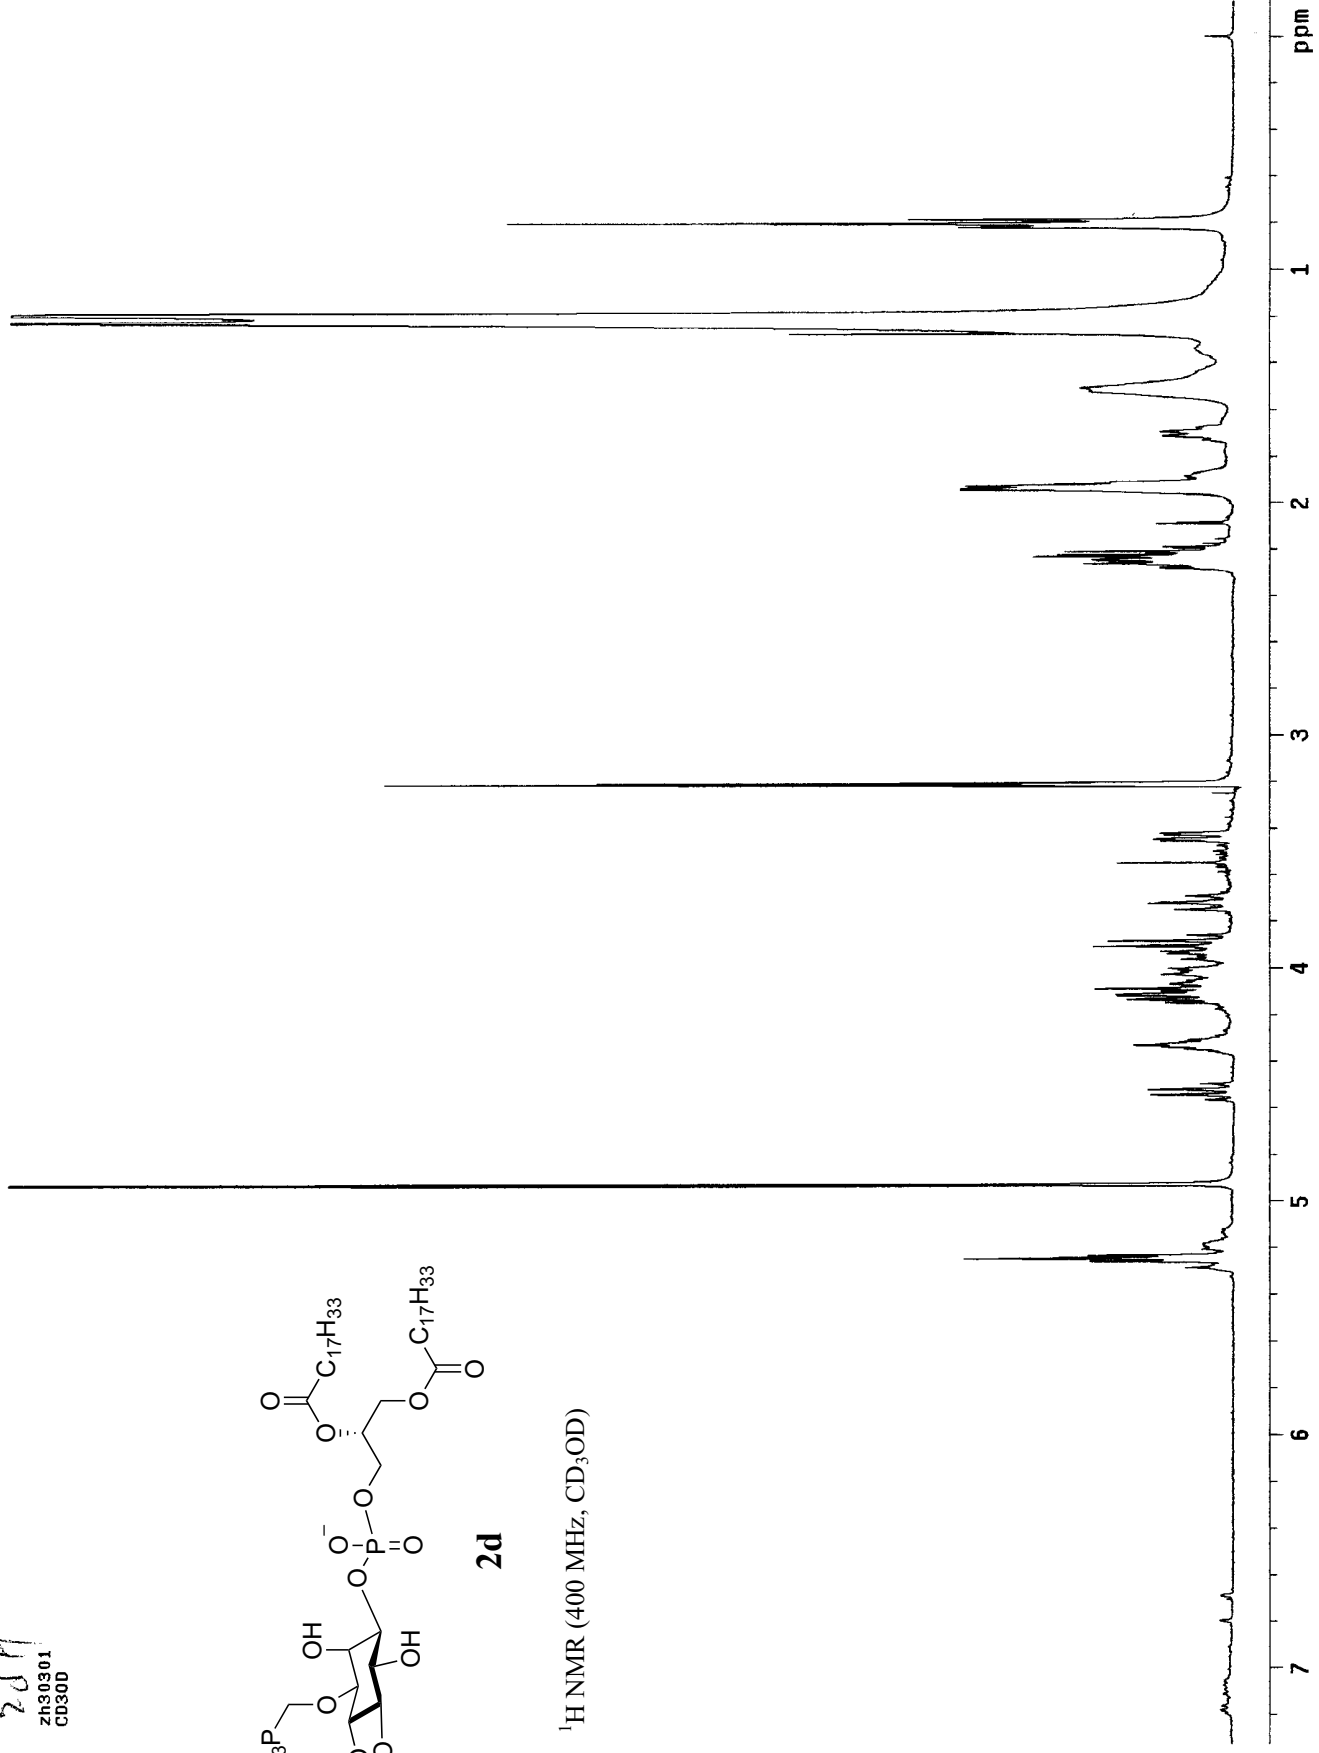

2d  
ZHS0301P  
CDS00

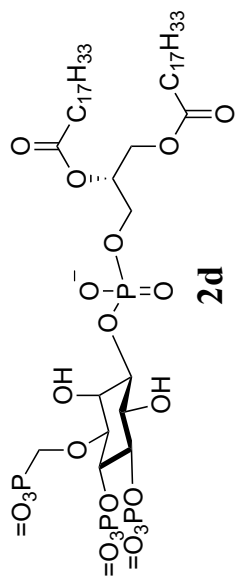

<sup>31</sup>P NMR (162 MHz, CD<sub>3</sub>OD)

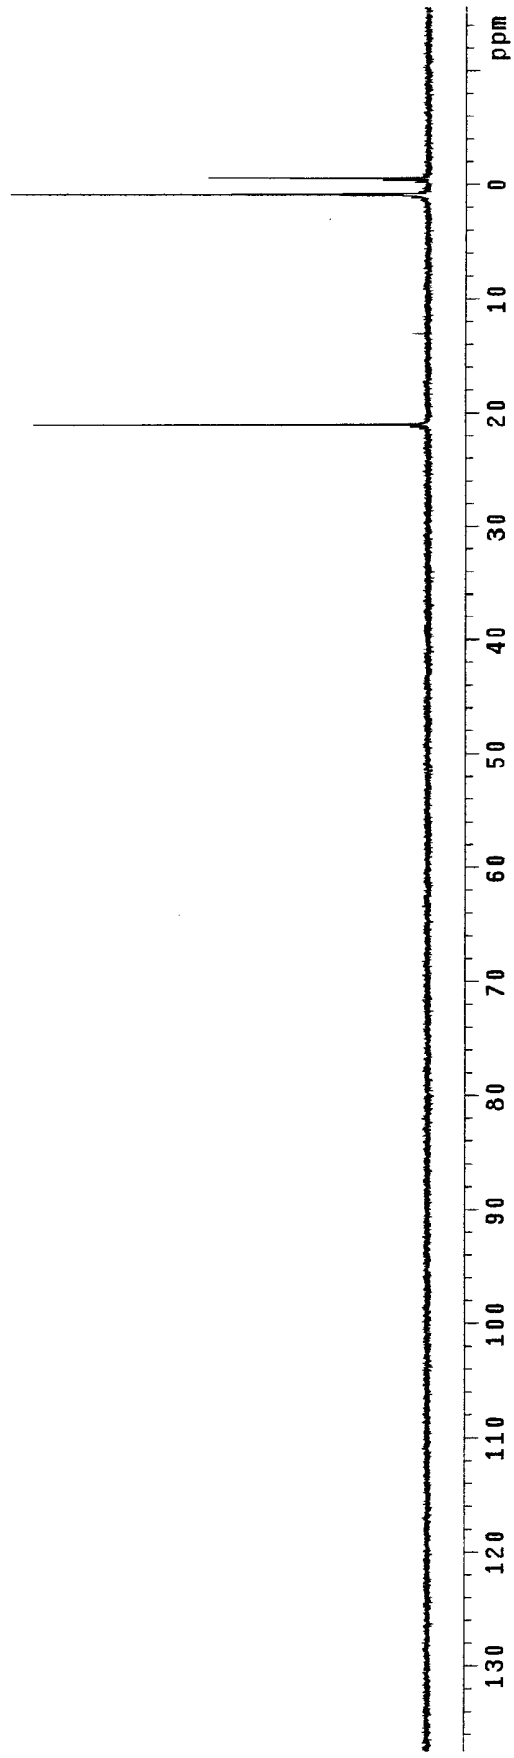

2dC

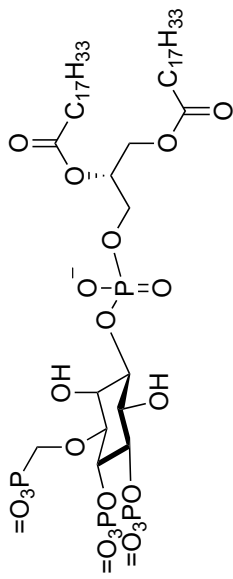

2d

<sup>13</sup>C NMR (101 MHz, CD<sub>3</sub>OD)

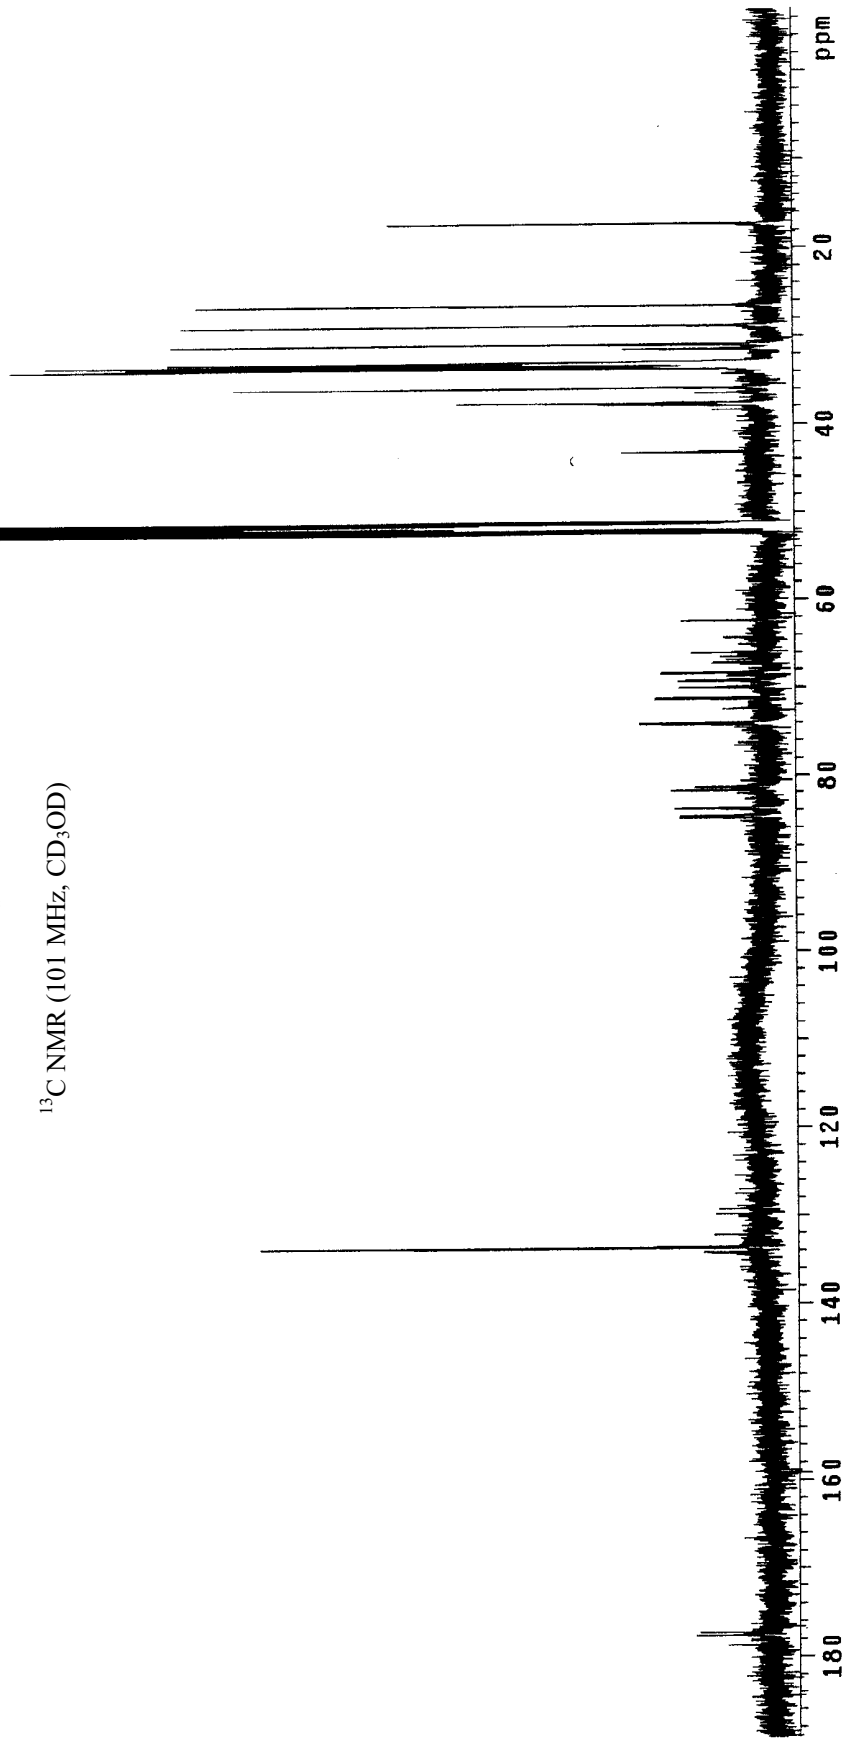

Supplement: NIHMS63702-supplement-1si20061115_04.pdf [file NIHMS63702-supplement-1si20061115_04.pdf]
